# Supplementary material for: Respiratory-associated deaths in people with intellectual disabilities: a systematic review and meta-analysis
Source: PubMed Central journal article supplement — BMJ Open. 2021 Jul 14;11(7):e043658. doi: 10.1136/bmjopen-2020-043658 (PMC8280912; doi:10.1136/bmjopen-2020-043658), 2021-07-14
Supplement: bmjopen-2020-043658.draft_revisions.pdf [file bmjopen-2020-043658.draft_revisions.pdf]

# BMJ Open

BMJ Open is committed to open peer review. As part of this commitment we make the peer review history of every article we publish publicly available.

When an article is published we post the peer reviewers' comments and the authors' responses online. We also post the versions of the paper that were used during peer review. These are the versions that the peer review comments apply to.

The versions of the paper that follow are the versions that were submitted during the peer review process. They are not the versions of record or the final published versions. They should not be cited or distributed as the published version of this manuscript.

BMJ Open is an open access journal and the full, final, typeset and author-corrected version of record of the manuscript is available on our site with no access controls, subscription charges or pay-per-view fees (<http://bmjopen.bmj.com>).

If you have any questions on BMJ Open's open peer review process please email [info.bmjopen@bmj.com](mailto:info.bmjopen@bmj.com)

# BMJ Open

## Respiratory-associated deaths in people with intellectual disabilities: a systematic review and meta-analysis

|                               |                                                                                                                                                                                                                                                                                                                                                                                                                                                                                                                                                                                                                                                                                                                                                                                                                                                                                                                                                                                                                                                                                                                                                                                                                                  |
|-------------------------------|----------------------------------------------------------------------------------------------------------------------------------------------------------------------------------------------------------------------------------------------------------------------------------------------------------------------------------------------------------------------------------------------------------------------------------------------------------------------------------------------------------------------------------------------------------------------------------------------------------------------------------------------------------------------------------------------------------------------------------------------------------------------------------------------------------------------------------------------------------------------------------------------------------------------------------------------------------------------------------------------------------------------------------------------------------------------------------------------------------------------------------------------------------------------------------------------------------------------------------|
| Journal:                      | <i>BMJ Open</i>                                                                                                                                                                                                                                                                                                                                                                                                                                                                                                                                                                                                                                                                                                                                                                                                                                                                                                                                                                                                                                                                                                                                                                                                                  |
| Manuscript ID                 | bmjopen-2020-043658                                                                                                                                                                                                                                                                                                                                                                                                                                                                                                                                                                                                                                                                                                                                                                                                                                                                                                                                                                                                                                                                                                                                                                                                              |
| Article Type:                 | Original research                                                                                                                                                                                                                                                                                                                                                                                                                                                                                                                                                                                                                                                                                                                                                                                                                                                                                                                                                                                                                                                                                                                                                                                                                |
| Date Submitted by the Author: | 11-Aug-2020                                                                                                                                                                                                                                                                                                                                                                                                                                                                                                                                                                                                                                                                                                                                                                                                                                                                                                                                                                                                                                                                                                                                                                                                                      |
| Complete List of Authors:     | <p>Truesdale, Maria; University of Glasgow College of Medical Veterinary and Life Sciences, Mental Health and Wellbeing<br/> Melville, Craig; Glasgow University, Institute of Health and Wellbeing<br/> Barlow, Fiona; University of Glasgow College of Medical Veterinary and Life Sciences, Mental Health and Wellbeing<br/> Dunn, Kirsty; University of Glasgow College of Medical Veterinary and Life Sciences, Mental Health and Wellbeing<br/> Henderson, Angela; University of Glasgow, Institute of Health and Wellbeing<br/> Hughes-McCormack, Laura; University of Glasgow, Institute of Health and Wellbeing<br/> McGarty, Arlene; University of Glasgow College of Medical Veterinary and Life Sciences, Mental Health and Wellbeing<br/> Rydzewska, Ewelina; University of Glasgow<br/> Smith, Gillian; University of Glasgow College of Medical Veterinary and Life Sciences, Mental Health and Wellbeing<br/> Symonds, Joseph; University of Glasgow College of Medical Veterinary and Life Sciences, Mental Health and Wellbeing<br/> Jani, Bhautesh; University of Glasgow College of Medical Veterinary and Life Sciences<br/> Kinnear, Deborah; University of Glasgow, Institute of Health and Wellbeing</p> |
| Keywords:                     | RESPIRATORY MEDICINE (see Thoracic Medicine), PUBLIC HEALTH, Respiratory infections < THORACIC MEDICINE                                                                                                                                                                                                                                                                                                                                                                                                                                                                                                                                                                                                                                                                                                                                                                                                                                                                                                                                                                                                                                                                                                                          |
|                               |                                                                                                                                                                                                                                                                                                                                                                                                                                                                                                                                                                                                                                                                                                                                                                                                                                                                                                                                                                                                                                                                                                                                                                                                                                  |

SCHOLARONE™  
Manuscripts

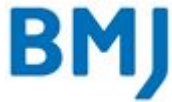

I, the Submitting Author has the right to grant and does grant on behalf of all authors of the Work (as defined in the below author licence), an exclusive licence and/or a non-exclusive licence for contributions from authors who are: i) UK Crown employees; ii) where BMJ has agreed a CC-BY licence shall apply, and/or iii) in accordance with the terms applicable for US Federal Government officers or employees acting as part of their official duties; on a worldwide, perpetual, irrevocable, royalty-free basis to BMJ Publishing Group Ltd ("BMJ") its licensees and where the relevant Journal is co-owned by BMJ to the co-owners of the Journal, to publish the Work in this journal and any other BMJ products and to exploit all rights, as set out in our [licence](#).

The Submitting Author accepts and understands that any supply made under these terms is made by BMJ to the Submitting Author unless you are acting as an employee on behalf of your employer or a postgraduate student of an affiliated institution which is paying any applicable article publishing charge ("APC") for Open Access articles. Where the Submitting Author wishes to make the Work available on an Open Access basis (and intends to pay the relevant APC), the terms of reuse of such Open Access shall be governed by a Creative Commons licence – details of these licences and which [Creative Commons](#) licence will apply to this Work are set out in our licence referred to above.

Other than as permitted in any relevant BMJ Author's Self Archiving Policies, I confirm this Work has not been accepted for publication elsewhere, is not being considered for publication elsewhere and does not duplicate material already published. I confirm all authors consent to publication of this Work and authorise the granting of this licence.

Title: "Respiratory-associated deaths in people with intellectual disabilities: a systematic review and meta-analysis"

#### Authors

Maria Truesdale<sup>1</sup> (Senior lecturer of Intellectual Disabilities)  
Craig Melville<sup>1</sup> (Professor of Intellectual Disabilities Psychiatry)  
Fiona Barlow<sup>1</sup> (Impact and Communications Officer, Scottish Learning Disabilities Observatory)  
Kirsty Dunn<sup>1</sup> (Postdoctoral Research Associate)  
Angela Henderson<sup>1</sup> (Director of Policy and Impact, Scottish Learning Disabilities Observatory)  
Laura Hughes-McCormack<sup>1</sup> (Research Associate)  
Arlene McGarty<sup>1</sup> (Postdoctoral Research Associate)  
Ewelina Rydzewska<sup>1</sup> (Postdoctoral Research Associate)  
Gillian Smith<sup>1</sup> (Research Assistant)  
Joseph Symonds<sup>1</sup> (Honorary Clinical Lecturer)  
Bhautesh Jani<sup>1</sup> (Clinical Senior Lecturer/Honorary Consultant)  
Deborah Kinnear<sup>1</sup> (Senior lecturer of Intellectual Disabilities)

#### Affiliations

<sup>1</sup> University of Glasgow, Institute of Health and Well-being, Glasgow, UK

#### Address for correspondence

Dr Maria Truesdale  
Senior lecturer in Intellectual Disabilities  
College of Medical Veterinary and Life Sciences  
University of Glasgow  
Institute of Health and Well-being  
Mental Health and Well-being  
2<sup>nd</sup> floor Administration Building  
Gartnavel Royal Hospital  
1055 Great Western Road  
Glasgow  
G12 0 XH

Email: [maria.truesdale@glasgow.ac.uk](mailto:maria.truesdale@glasgow.ac.uk)

Tel: +44(0) 141 232 3926

Fax: +44 (0) 141 211 0356

Keywords: Respiratory disease, mortality, intellectual disability, systematic review, meta-analysis

Wordcount: 3504

## ABSTRACT

**Objective** To review and synthesise evidence on rates of respiratory-associated deaths and associated risk factors in the ID population.

**Design** Systematic review with meta-analysis

**Data sources** MEDLINE, CINAHL, ISI Web of Science, and PsychINFO were searched for studies published between January 1985 to April 2020 and examined study and outcome quality. Reference lists and Google Scholar were also hand searched.

**Results** We identified 2,063 studies, 17 were included in the narrative synthesis and 10 in the meta-analysis. Data from 90,302 people with ID and 27,394 deaths were extracted.

Significantly higher rates of respiratory-associated deaths were found among people with ID (SMR 10·86 (95% CI 5·32, 22·18,  $p<0\cdot001$ ), lesser rates for adults (SMR 6·53 (95% CI 4·29, 9·96,  $p<0\cdot001$ ); and relatively high rates from pneumonia 26·65 (95% CI 5·63, 126·24,  $p<0\cdot001$ ). The overall statistical heterogeneity was  $I^2=99\cdot0\%$ .

**Conclusion** Premature deaths due to respiratory disorders are potentially avoidable with improved public health initiatives and equitable access to quality health care. Further research should focus on developing prognostic guidance and validated tools for clinical practice to mitigate risks of respiratory-associated deaths.

**PROSPERO registration number** CRD42020180479

### Article summary

#### Strengths and limitations of this study

- The meta-analysis included mortality ratios from ten observational studies covering 1,844 respiratory deaths in people with intellectual disabilities.
- A rigorous and systematic analysis process was undertaken which minimised the risk of bias, errors and omissions.
- Meta-regression was not performed on predictors or factors reported in studies which increase SMRs for respiratory deaths

### Introduction

People with intellectual disabilities account for approximately 1-3% of the global population.[1,2] The World Health Organisation (1992)[3] defines intellectual disabilities as impairments in adaptive functioning, social functioning, and intellectual functioning, ( $IQ<70$ ) requiring a need for daily support, with the onset in the developmental phase ( $<18$  years). Life

1  
2  
3  
4  
5  
6  
7  
8  
9  
10  
11  
12  
13  
14  
15  
16  
17  
18  
19  
20  
21  
22  
23  
24  
25  
26  
27  
28  
29  
30  
31  
32  
33  
34  
35  
36  
37  
38  
39  
40  
41  
42  
43  
44  
45  
46  
47  
48  
49  
50  
51  
52  
53  
54  
55  
56  
57  
58  
59  
60

expectancy and mortality rates are important indicators of health inequality.[4] People with intellectual disabilities die up to 20 years earlier than the general population.[5-8] Respiratory disorders are a leading cause of death among people with intellectual disabilities.[6,9] The range of standardised mortality ratios (SMRs) due to respiratory disorders for people with intellectual disabilities are very high in some studies,[10-12] and much lower in others.[13-15] This systematic review and meta-analysis aims to investigate and quantify the risk of, and factors associated with, respiratory-associated deaths in people with intellectual disabilities.

## Methods

This systematic review and meta-analysis were conducted in accordance with the Preferred Reporting Items for Systematic Reviews and Meta-Analyses guidelines.[16] This review was prospectively registered with the International Prospective Register of Systematic Reviews (PROSPERO, registration number: CRD42020180479).

## Eligibility

This systematic review included studies with individuals with intellectual disabilities and a comparison group of individuals in the general population, with respiratory disorders included as a separate cause of death. For studies that included multiple disabilities, at least 70% of participants had to have intellectual disabilities, if results were not reported separately. Studies also had to be full-text, peer-reviewed, and published in English. To be included in the meta-analysis, studies had to report SMRs with 95% confidence intervals for respiratory associated deaths or provide sufficient data to calculate SMRs. Studies were excluded if they focused on specific etiologies of intellectual disabilities, such as Down syndrome, were excluded as these are associated with a different health and mortality profiles compared to other people with intellectual disabilities. Studies focused on post-operative and post-treatment deaths were excluded as these are not representative of the wider population with intellectual disabilities. Studies with small samples (<20 participants) or case series designs were also excluded as these papers are less representative.

## Search strategy and selection criteria

We searched Embase, ISI Web of Science (all databases), CINAHL, and PsycINFO from 1<sup>st</sup> January 1985 to the 27<sup>th</sup> of April 2020, using comprehensive terms related to ‘intellectual disabilities’, ‘mortality’, and ‘respiratory disease’ (full search strategy in Appendix 1). In addition, a manual bibliography and citation search of included studies was conducted using

1  
2 Google Scholar and key researchers in the field of mortality in individuals with intellectual  
3 disabilities were emailed to identify any additional relevant papers. The aforementioned  
4 eligibility criteria was used. After duplicates were removed, all records were imported into  
5  
6 Covidence software ([www.covidence.org](http://www.covidence.org)) for title and abstract and full text screening. All  
7  
8 titles, abstracts (CM & AMcG) and full-texts (CM, AMcG, ER) were double-screened with  
9  
10 inter-rater reliability (Cohen's kappa) of  $\kappa = .57$  and  $\kappa = .58$ , respectively.  
11  
12  
13

### 14 **Data Extraction**

15  
16 Data extraction was conducted using a structured database created in Excel. Five researchers  
17 (GS, LHM, DK, KD, AMcG) each extracted data from 25% of the included studies and, to  
18 check reliability, one other researcher (CM) independently extracted data from 20% of included  
19 studies. Extracted data were compared in meetings and discrepancies resolved through  
20 consensus discussion. Researchers did not extract data on included papers where they were a  
21 listed author.  
22  
23  
24  
25  
26  
27

### 28 **Assessment of study and outcome quality**

29  
30 Study quality was appraised using the Standard Quality Assessment Criteria for Evaluating  
31 Primary Research Papers from a Variety of Fields.[17] Quality ratings were calculated in  
32 percentage form using the standard method[17] and categorised as weak (<55%), moderate (55-  
33 75%), or strong (>75%) quality. Each paper had quality appraisals completed by two  
34 researchers, who then agreed a consensus score for each item (Table 1).[17] Researchers did  
35 not evaluate quality of papers where they were a listed author. Risk of bias score was not used  
36 to exclude any studies from either the systematic review or meta-analysis. We evaluated the  
37 quality of our own systematic review using the Measurement Tool to Assess Systematic  
38 Reviews (AMSTAR) checklist.[18]  
39  
40  
41  
42  
43  
44  
45  
46  
47  
48  
49  
50  
51  
52  
53  
54  
55  
56  
57  
58  
59  
60

**Table 1: Characteristics of studies reporting mortality rates for respiratory disorders and pneumonia in people with intellectual disabilities**

| Author                               | Country   | Study design, setting and follow up                                                     | Data sources                                                                                                       | ID sample (N, % female, age, level of ID)                                                                                                     | Deaths in ID sample (N, % female, age at time of death, level of ID)                                                     | Comparison sample (N, % female, age,) and deaths (n, % female, age)                                          | Respiratory disorder definition                 | Quality Percentage (assessment) |
|--------------------------------------|-----------|-----------------------------------------------------------------------------------------|--------------------------------------------------------------------------------------------------------------------|-----------------------------------------------------------------------------------------------------------------------------------------------|--------------------------------------------------------------------------------------------------------------------------|--------------------------------------------------------------------------------------------------------------|-------------------------------------------------|---------------------------------|
| Brameld et al (2018) <sup>26</sup>   | Australia | Retrospective matched cohort study of adults 20 years old and over. Follow up 2009-2013 | Intellectual Disability Exploring Answers (IDEA) Database. Death certificate data                                  | Total sample characteristics not available                                                                                                    | N= 591; 43·8% female; mean age* and level of ID not available                                                            | Total sample characteristics not available. Number of deaths= 62, 917; 47·4% female; mean age not available  | ICD 10-chapter codes for respiratory disorders. | 95·45% (strong)                 |
| Cooper et al (2020) <sup>28</sup>    | UK        | Population-based cohort study. Follow up 2001-2018                                      | Primary care records and health check data; Death certificate data. Comparison data from Health Board statistics   | N= 962; 45·4% female; mean age= 44·1 years (range 16-83); ID Mild=382 (39·7%), Moderate=236 (24·5%), Severe=180 (18·7%), Profound=163 (17·0%) | N= 294/961 (30·6%); 47·5% female; mean age= 52·4 (SD 13·6)                                                               | Not available                                                                                                | ICD 10-chapter codes for respiratory disorders. | 86·36% (strong)                 |
| Dupont et al. (1987) <sup>40</sup>   | Denmark   | Population- based cohort study of adults with mild ID. Follow up 1976-1984              | Danish National Service for the Mentally Retarded. Death certificate data.                                         | N = 7134; gender, age and level of ID not available                                                                                           | N=446; 37·9% females; age and level of ID not available                                                                  | Not available                                                                                                | Not described                                   | 40·90% (weak)                   |
| Durvasula et al (2002) <sup>37</sup> | Australia | Population-based cohort study of children and adults. Follow up 1989 - 1999             | ID prevalence study. Death certificate data, medical records and post-mortem data. Australian Bureau of Statistics | N = 693; 44·6% female; mean age= N/A; ID 40% mild, 35% moderate, 25% severe/profound                                                          | N=40 (6%); 45% female; median age= 32 (range 10-59); level of ID not available                                           | N= 125,848; 51% female; mean age not available. Number of deaths= 2154; 37·8% female; mean age not available | Not described                                   | 90·91% (strong)                 |
| Forsgren et al (1996) <sup>15</sup>  | Sweden    | Population-based cohort study of adults with ID. Follow up 1986 – 1992                  | Board for Provision and Services to the Mentally Retarded. Death certificate data                                  | N = 1,478; 44·5% female; age and level of ID not available                                                                                    | N= 247; 42·1% female; Median age= 64 years (IQR 52-75 years); ID 39·7% Mild, 31·2%, Moderate, 21·5% Severe 7·7% Profound | Not available                                                                                                | ICD 9-chapter codes for respiratory disorders.  | 81·82% (strong)                 |



1  
2  
3  
4  
5  
6  
7  
8  
9  
10  
11  
12  
13  
14  
15  
16  
17  
18  
19  
20  
21  
22  
23  
24  
25  
26  
27  
28  
29  
30  
31  
32  
33  
34  
35  
36  
37  
38  
39  
40  
41  
42  
43  
44  
45  
46

|                                    |        |                                                                                                                                |                                                                                                              |                                                                                            |                                                                                                                         |                                                                                                                        |                                                 |                 |
|------------------------------------|--------|--------------------------------------------------------------------------------------------------------------------------------|--------------------------------------------------------------------------------------------------------------|--------------------------------------------------------------------------------------------|-------------------------------------------------------------------------------------------------------------------------|------------------------------------------------------------------------------------------------------------------------|-------------------------------------------------|-----------------|
|                                    |        |                                                                                                                                | from Swedish National Bureau of Statistics                                                                   |                                                                                            |                                                                                                                         |                                                                                                                        |                                                 |                 |
| Glover et al (2017) <sup>8</sup>   | UK     | Population-based case control study in primary care. Follow up 2010-2014                                                       | Primary care records (CPRD). Death certificate data                                                          | Total sample characteristics not available                                                 | N = 664 deaths; 44.1% female                                                                                            | Total sample characteristics not available. N of deaths= 97, 379; 52.3% female; mean age not available                 | ICD 10-chapter codes for respiratory disorders. | 81.82% (strong) |
| Heslop et al (2014) <sup>5</sup>   | UK     | Population based audit of deaths of children and adults with intellectual disabilities aged 4 and over. Audit period 2010-2012 | Medical records Death certificate data from UK Office of National Statistics                                 | Total sample characteristics not available                                                 | N=247; 42.1% female; median age= 64 years (IQR 52-75 years); ID 39.7% mild, 31.2% moderate, 21.5% severe, 7.7% profound | Total sample characteristics not available. Number of deaths= 480, 467; 51.6% female; median age not available         |                                                 | 81.82% (strong) |
| Hollins et al (1998) <sup>11</sup> | UK     | Cohort study of adults on an ID register. Follow up 1982-1990                                                                  | Learning disability register. Death certificate data.                                                        | N = 2,026; gender, age and ID level not available                                          | N= 268 deaths; gender and age not available; 51.5% mild-moderate, 48.5% severe-profound                                 | Not available                                                                                                          | Not described                                   | 81.82% (strong) |
| Hosking et al (2016) <sup>24</sup> | UK     | Population-based case control study in primary care. Follow up 2009-2013                                                       | Primary care records (Clinical Practice Research Data linkage; CPRD). Death certificate data                 | N = 16,666; 58.1% female; mean age 39.9 (SD 16.2). 19.6% of sample had high support needs. | N=656 (3.9%); 55.6% female; age and level of ID not available                                                           | N= 113, 562; 58.1% female; mean age not available. Number of deaths= 1358 (1.2%); 60.4% female; mean age not available | ICD 10-chapter codes for respiratory disorders. | 90.91% (strong) |
| Janicki et al (1999) <sup>22</sup> | USA    | Cohort of adults with intellectual disabilities 40 years old and over. Follow up 1984-1993                                     | Data from state agency with responsibility for reviewing deaths of disabled persons. Health department data. | Total sample characteristics not available.                                                | N= 2752, 48.1% female; mean age- 65.1; ID 18%, 68% Moderate – profound (68%), 4% unspecified, 10% unknown               | Total sample characteristics not available. Number of deaths= 149, 980; gender not available, mean age= 70.0           | ICD 9-chapter codes for respiratory disorders.  | 77.27% (strong) |
| Ng et al (2017) <sup>12</sup>      | Sweden | Population-based case control study of adults with ID 55 years old and over. Follow up 2002-2015                               | National database of hospital admissions and outpatient care. National disability register. Swedish          | N = 15, 289; 45.5% females; mean age not available; level of ID not available              | N= 4728; 44.9% female; age and ID level not available                                                                   | N= 74, 445; 45.5% females; mean age not available. Number of deaths= 8364                                              | ICD 10-chapter codes for respiratory disorders. | 95.45% (strong) |

1  
2  
3  
4  
5  
6  
7  
8  
9  
10  
11  
12  
13  
14  
15  
16  
17  
18  
19  
20  
21  
22  
23  
24  
25  
26  
27  
28  
29  
30  
31  
32  
33  
34  
35  
36  
37  
38  
39  
40  
41  
42  
43  
44  
45  
46

|                                     |             |                                                                                                                        | National Cause of Death register                                                                                                                   |                                                                                                                                                   |                                                                                                                                                                                            |                                                                                                                   |                                                 |                 |
|-------------------------------------|-------------|------------------------------------------------------------------------------------------------------------------------|----------------------------------------------------------------------------------------------------------------------------------------------------|---------------------------------------------------------------------------------------------------------------------------------------------------|--------------------------------------------------------------------------------------------------------------------------------------------------------------------------------------------|-------------------------------------------------------------------------------------------------------------------|-------------------------------------------------|-----------------|
| Oppewal et al (2018) <sup>27</sup>  | Netherlands | Cohort study of adults with ID 50 years old and over living in three care organisations. Follow up Nov 2013-March 2018 | Medical case notes of participants with ID who died during study period. Cause specific mortality statistics for 50+ population in the Netherlands | N = 1050; 48.7% female; mean age= 61.6 (SD 8.0, range 50-94); ID level= 2.9% borderline, 21.2% mild, 48.2% moderate, 16.4% severe, 8.7% profound; | N=207 deaths (19.7%) but only 159 with cause of death available. 60.7% female; mean age not available; ID level= 5.7% borderline, 18.9% mild, 54.7% moderate, 13.2% severe, 7.5% profound; | Not available                                                                                                     | ICD 10-chapter codes for respiratory disorders. | 50.0% (weak)    |
| Patja et al (2001) <sup>14</sup>    | Finland     | Population based, nationwide cohort study. Follow up 1963-1997                                                         | Original 1962 population-based study (Amnell et al. 1964). Death certificate data                                                                  | N = 2,369, gender, age and level of ID not available                                                                                              | 1111 deaths with death certificates available for 1,095- 51.0% female, mean age= 57.7; ID 40.3% mild, 29.4% moderate, 11.5% severe, 18.0% profound, 0.7% unknown                           | Not available                                                                                                     | ICD 9-chapter codes for respiratory disorders.  | 81.82% (strong) |
| Raitasuo et al (1997) <sup>13</sup> | Finland     | Cohort study of adults living in an institution. Follow up 1972-1993                                                   | Medical case notes and death certificate data. General population mortality statistics for population in Finland.                                  | N ≈ 2000; gender, age and level of ID not available                                                                                               | 216 deaths- 42.6% female; mean age 26.7 (1-86 years); ID level 2.0% borderline, 15.0% mild, 18.0% moderate, 20.0% severe, 45.0% profound, 20.0% unknown                                    | Not available                                                                                                     | ICD 9-chapter codes for respiratory disorders.  | 54.55% (weak)   |
| Smith et al (2020) <sup>10</sup>    | UK          | Nationwide, population based cohort study of children aged 4-19. Follow up 2008-2015.                                  | Scottish pupils census: Death certificates data                                                                                                    | N= 18, 278; 35% female; mean age not available                                                                                                    | N= 106; mean age= 14.3 (95% CI 13.4 to 15.1); level of ID not available                                                                                                                    | N= 777,912; 50% female; mean age not available. number of deaths= 458; mean age= 16.1 years (95% CI 15.8 to 16.5) | ICD 10-chapter codes for respiratory disorders. | 100% (strong)   |
| Trollor et al (2017) <sup>25</sup>  | Australia   | Population based cohort study of adults 20 years old and above registered with                                         | Disability Services Minimal Dataset. Australian Bureau                                                                                             | N= 19,362; 44% female, mean age= 37 (range 27-48); ID not available                                                                               | N= 732 (4%); 41% female; median age = 54 (42-64), level of ID not available                                                                                                                | Total sample characteristics not available. Number of deaths= 305, 050; 49%                                       | ICD 10-chapter codes for respiratory disorders. | 95.45% (strong) |

1  
2  
3  
4  
5  
6  
7  
8  
9  
10  
11  
12  
13  
14  
15  
16  
17  
18  
19  
20  
21  
22  
23  
24  
25  
26  
27  
28  
29  
30  
31  
32  
33  
34  
35  
36  
37  
38  
39  
40  
41  
42  
43  
44  
45  
46

For peer review only

|                                          |    |                                                                                                           |                                                                                                     |                                                            |                                                  |                                                                       |                                                            |                   |
|------------------------------------------|----|-----------------------------------------------------------------------------------------------------------|-----------------------------------------------------------------------------------------------------|------------------------------------------------------------|--------------------------------------------------|-----------------------------------------------------------------------|------------------------------------------------------------|-------------------|
|                                          |    | disability services. Follow up 2005-2011                                                                  | of Statistics. Death records                                                                        |                                                            |                                                  | female; median age= 81 (70–92).                                       |                                                            |                   |
| Tyrer and McGrother (2009) <sup>23</sup> | UK | Population-based cohort study of individuals with moderate-profound ID on a register. Follow up 1993-2006 | Leicestershire learning disability register. Death certificate data. National Statistics 1993-2006. | N = 2,995; 41·9% female; Age and level of ID not available | N=503; gender, age and level of ID not available | Total sample characteristics not available. Number of deaths≈126, 000 | ICD 9 and ICD 10- chapter codes for respiratory disorders. | 72·73% (moderate) |

\*Individuals in the ID cohort died at a significantly younger age than the comparison cohort

## Summary of outcomes and statistical analysis

Findings of all included studies were combined in a narrative synthesis. The primary goal of the meta-analysis was to investigate if the SMRs of respiratory-associated deaths differ for individuals with and without intellectual disabilities. Meta-analysis was undertaken using RevMan. Included studies reported either:

- a SMR or hazard ratio (HR)

OR

- the observed number of deaths or expected deaths necessary to calculate a SMR. These were calculated using STATA (version 14) by dividing the observed number of deaths in a cohort study group by the expected mortality based on age and gender-specific death rates in the general population comparison group.

Random effects meta-analysis (inverse of the variance method) was used to calculate the weighted mean all cause SMR across studies. As the SMR is a ratio, log transformation was needed to maintain symmetry in the analysis.[19] All values were transformed to log values for computations and back transformed for presentation of the results. Weighted mean log-SMRs and their 95% confidence intervals were reported separately for individuals with and without intellectual disabilities with the  $Q$  value and associated  $p$  value being used to assess the statistical significance of any difference in means. The magnitude of the difference and associated confidence interval (CI) were also reported. Where data permitted, further subgroup analyses were conducted to examine sources of heterogeneity. Potential factors for consideration included sex, age group, level of intellectual disabilities, socio-economic status and ethnicity. Random effects models were used for subgroup analyses.

The Chi-squared statistic  $I^2$  was chosen to measure level of heterogeneity across the studies, as it allows for interpretation of results regardless of the number of studies included in the meta-analysis, the type of outcome data, or effect measurement.[20] Heterogeneity was interpreted as not observed when  $I^2=0\%$ , low when  $I^2=25\%$ , medium when  $I^2=50\%$ , and high when  $I^2=75\%$ .[20] Random effects models were selected for this analysis due to the different populations and measures in the included studies.

## Sensitivity analysis

Sensitivity analysis was used to assess the impact of risk of bias for each study on the weighted mean SMR. Data were removed one-by-one from the meta-analysis for each study, beginning with the lowest ranked papers, to determine their effect and re-estimate the weighted mean

1  
2 SMR. Cumulative analysis, starting with larger studies and sequentially adding smaller studies,  
3 was used to investigate how the weighted mean SMR estimate changes as small studies are  
4 added.[21]  
5  
6  
7

### 8 9 **Patient and public involvement**

10 No patient and public involved.  
11  
12

### 13 14 **Results**

15  
16 Figure 1 summarises the systematic search, selection and reasons for exclusion. All 17 studies  
17 were included in the narrative synthesis and 10 were included in the meta-analysis. A full list  
18 of studies excluded from full-text screening is available in Appendix 3.  
19  
20  
21

22  
23 **[Insert Figure 1: PRISMA flow diagram of systematic search and selection]**  
24  
25

26 Table 1 illustrates the characteristics of studies reporting mortality rates for respiratory  
27 disorders and pneumonia in people with intellectual disabilities and table 2 presents all-cause  
28 mortality and deaths from respiratory disorders in people with intellectual disabilities.  
29  
30  
31  
32  
33  
34  
35  
36  
37  
38  
39  
40  
41  
42  
43  
44  
45  
46  
47  
48  
49  
50  
51  
52  
53  
54  
55  
56  
57  
58  
59  
60

**Table 2: All-cause mortality and deaths from respiratory disorders in people with intellectual disabilities**

| Author                             | All-cause mortality                          | Deaths from respiratory disorders | Between group comparison of deaths from respiratory disorders | Deaths from individual respiratory disorders                                                                                                                                                                                                                                                                                                                                                                                                                                                                                                                                                                                                                                                                                                                                                  | Between group comparison of deaths from individual respiratory disorders                                                                                                                                                                                                                                                                                                                                            | Variables associated with risk of death from respiratory disorders                                                                                                                                                                                     |
|------------------------------------|----------------------------------------------|-----------------------------------|---------------------------------------------------------------|-----------------------------------------------------------------------------------------------------------------------------------------------------------------------------------------------------------------------------------------------------------------------------------------------------------------------------------------------------------------------------------------------------------------------------------------------------------------------------------------------------------------------------------------------------------------------------------------------------------------------------------------------------------------------------------------------------------------------------------------------------------------------------------------------|---------------------------------------------------------------------------------------------------------------------------------------------------------------------------------------------------------------------------------------------------------------------------------------------------------------------------------------------------------------------------------------------------------------------|--------------------------------------------------------------------------------------------------------------------------------------------------------------------------------------------------------------------------------------------------------|
| Brameld et al (2018) <sup>26</sup> | 591 had ID /63,508 out of all deaths (0.93%) | 62/591 (10.5%) deaths             | Not available                                                 | <p>Emergency Department presentations in the last year of life:</p> <p>Influenza and pneumonia RR=2.6 (95% CI 2.0-3.4 p&lt;0.001)</p> <p>Chronic obstructive pulmonary disease (COPD) RR=0.8 (95%CI 0.5-1.6, p=0.596)</p> <p>Asthma RR=4.7 (95%CI 2.1-10.4, p&lt;0.001)</p> <p>Ear, nose and throat infections RR=1.9 (95%CI 0.8-4.0, p=0.122)</p> <p>Pneumonitis due to solids/liquids RR=17.9 (95%CI 11.3-28.3 p&lt;0.001)</p> <p>Hospital admissions in the last year of life:</p> <p>Influenza and pneumonia RR=2.3 (1.0-5.3, p=0.044)</p> <p>COPD RR=1.4 (95%CI 0.9-2.4, p=0.164)</p> <p>Asthma RR=4.6 (95%CI 1.4-15.0, p=0.011)</p> <p>Ear, nose and throat infections RR=0.0 (95%CI 0.0-., p=0.972)</p> <p>Pneumonitis due to solids/liquids RR=17.6 (95%CI 11.7-26.5, p&lt;0.001)</p> | <p>Decedents with intellectual disability had increased odds of dying of (relative odds of having condition listed as underlying cause of death), adjusted for comorbidity:</p> <p>Influenza/pneumonia (OR=5.3, 95% CI 2.4-11.8)</p> <p>Pneumonitis due to solids or liquids (OR=9.9, 95% CI 5.1-19.3)</p> <p>Asthma (OR=2.3, 95% CI 1.0=5.2) (not significant)</p> <p>No difference for COPD as cause of death</p> | Decedents with intellectual disability had increased A&E attendance but received less hospital-based specialist palliative care. For those in hospitals, they were more likely to have hospital stays involving intensive care and ventilator support. |

1  
2  
3  
4  
5  
6  
7  
8  
9  
10  
11  
12  
13  
14  
15  
16  
17  
18  
19  
20  
21  
22  
23  
24  
25  
26  
27  
28  
29  
30  
31  
32  
33  
34  
35  
36  
37  
38  
39  
40  
41  
42  
43  
44  
45  
46

For peer review only

|                                         |                                                                           |                                                                                                    |                                                                                                                         |                                                                                                                                        |                                                                                                                                                                                                                                                                                                                                                                                                                                                                                                                                                                                                                                                                                                                                                                                                                                                                |                      |
|-----------------------------------------|---------------------------------------------------------------------------|----------------------------------------------------------------------------------------------------|-------------------------------------------------------------------------------------------------------------------------|----------------------------------------------------------------------------------------------------------------------------------------|----------------------------------------------------------------------------------------------------------------------------------------------------------------------------------------------------------------------------------------------------------------------------------------------------------------------------------------------------------------------------------------------------------------------------------------------------------------------------------------------------------------------------------------------------------------------------------------------------------------------------------------------------------------------------------------------------------------------------------------------------------------------------------------------------------------------------------------------------------------|----------------------|
| <p>Cooper et al (2020)<sup>28</sup></p> | <p>294/ 961 (30.6%) deaths<br/><b>SMR = 2.24 (95% CI; 1.98, 2.49)</b></p> | <p>Underlying cause of death: 57/ 262 (21.8%) deaths<br/><b>SMR= 6.78 (95% CI; 5.02, 8.54)</b></p> | <p>Underlying cause of death: Down syndrome: 8/ 57 (14.0%) deaths<br/>Without Down syndrome: 49/ 205 (23.9%) deaths</p> | <p>All-contributing factors in death:<br/><br/>Respiratory infection = 27.1% deaths<br/>Aspiration/ reflux/ choking = 19.8% deaths</p> | <p>Underlying cause of death:<br/>Down syndrome:<br/>Aspiration/ reflux/ choking = &lt;5/ 57 deaths<br/>Respiratory infection = &lt;5/ 57 deaths<br/>Other respiratory conditions = &lt;5/ 57 deaths<br/><br/>Without Down syndrome:<br/><br/>Aspiration/ reflux/ choking = 22/ 205 (10.8%) deaths<br/>Respiratory infection = 21/ 205 (10.3%) deaths<br/>Other respiratory conditions = 9/ 205 (4.4%) deaths<br/><br/>All-contributing factors in death:<br/><br/>Down syndrome:<br/>Respiratory infection = 22/ 57 (38.6%) deaths<br/>Aspiration/ reflux/ choking = 11/ 57 (19.3%) deaths<br/>Other respiratory conditions = &lt;5/ 57 deaths<br/><br/>Without Down syndrome:<br/><br/>Respiratory infection = 49/ 205 (23.9%) deaths<br/>Aspiration/ reflux/ choking = 41/ 205 (20.2%) deaths<br/>Other respiratory conditions = 31/ 205 (15.1%) deaths</p> | <p>Not available</p> |
|-----------------------------------------|---------------------------------------------------------------------------|----------------------------------------------------------------------------------------------------|-------------------------------------------------------------------------------------------------------------------------|----------------------------------------------------------------------------------------------------------------------------------------|----------------------------------------------------------------------------------------------------------------------------------------------------------------------------------------------------------------------------------------------------------------------------------------------------------------------------------------------------------------------------------------------------------------------------------------------------------------------------------------------------------------------------------------------------------------------------------------------------------------------------------------------------------------------------------------------------------------------------------------------------------------------------------------------------------------------------------------------------------------|----------------------|

1  
2

|                                                                                        |                                        |                                                                                                  |                                                                                                                                                                                                                                                                               |                                                                                                                                                                                                                                                                                                                                                                                             |                                                                                                                                                  |               |                                                         |
|----------------------------------------------------------------------------------------|----------------------------------------|--------------------------------------------------------------------------------------------------|-------------------------------------------------------------------------------------------------------------------------------------------------------------------------------------------------------------------------------------------------------------------------------|---------------------------------------------------------------------------------------------------------------------------------------------------------------------------------------------------------------------------------------------------------------------------------------------------------------------------------------------------------------------------------------------|--------------------------------------------------------------------------------------------------------------------------------------------------|---------------|---------------------------------------------------------|
| 3<br>4<br>5<br>6<br>7<br>8<br>9<br>10<br>11<br>12<br>13<br>14<br>15<br>16<br>17<br>18  | Dupont et al<br>(1987) <sup>40</sup>   | N=446<br>deaths /<br>7134 (5.9%)<br>people with<br>mild ID<br>N=277<br>males<br>N=169<br>females | Respiratory<br>deaths common<br>cause of death<br>in people with<br>ID (all ages)<br>Tests of<br>significance<br>only; respiratory<br>deaths were<br>more common<br>for males with<br>ID (all ages),<br>and females<br>aged 35-64,<br>versus<br>population of<br>Denmark 1977 | Not available                                                                                                                                                                                                                                                                                                                                                                               | Not available                                                                                                                                    | Not available | Not available                                           |
| 19<br>20<br>21<br>22<br>23<br>24<br>25<br>26<br>27<br>28<br>29<br>30<br>31<br>32<br>33 | Durvasula<br>(2002) <sup>30</sup>      | 40/693 (6%)<br>deaths                                                                            | 14/40 (35%)<br>deaths                                                                                                                                                                                                                                                         | For people under 40,<br>respiratory and external<br>deaths were most common,<br>for people over 40, cancer<br>and respiratory deaths<br>were most common<br>Age: 7/14 deaths in under<br>25-year-olds and 6/14<br>deaths in 40+ year olds<br>Sex: 11/14 deaths in males<br>Conditions: 2/14 had<br>Down syndrome &<br>dementia, 1/14 had<br>myelodysplastic syndrome,<br>1x Battens disease | Not available                                                                                                                                    | Not available | Age, gender, Down syndrome,<br>myelodysplastic syndrome |
| 34<br>35<br>36<br>37<br>38<br>39<br>40                                                 | Forsgren et<br>al (1996) <sup>15</sup> | N=124 /<br>1478 (8.4%)<br>people with<br>ID (all ages),<br>over 9,992<br>person-years            | N=13 /124<br>(10%) deaths<br>were respiratory<br>disease for<br>people with ID<br>vs n=3.9<br>expected,                                                                                                                                                                       | Respiratory disease was<br>common cause of death for<br>people with ID and<br>epilepsy but SMR was not<br>possible due to small<br>sample size                                                                                                                                                                                                                                              | Pneumonia was most<br>common cause of death, but<br>rarely reported as underlying<br>cause<br><br>Pneumonia was most<br>common cause of death in | Not available | Epilepsy (active seizures)                              |

41  
42  
43  
44  
45  
46



1  
2

|                                        |                                                                                                                                                                                                                                          |                                                                                                               |                      |                                                                                                                                                                                                                                                                                                                                                                                                                                                                                                                                              |                      |                      |
|----------------------------------------|------------------------------------------------------------------------------------------------------------------------------------------------------------------------------------------------------------------------------------------|---------------------------------------------------------------------------------------------------------------|----------------------|----------------------------------------------------------------------------------------------------------------------------------------------------------------------------------------------------------------------------------------------------------------------------------------------------------------------------------------------------------------------------------------------------------------------------------------------------------------------------------------------------------------------------------------------|----------------------|----------------------|
|                                        | <p><b>SMR 2.0 (95% CI 1.7, 2.3)</b><br/>Males 1.6 (95% CI 1.2, 2.0),<br/>Females 2.6 (95% CI 2.0, 3.3)<br/><i>Additional: SMRs for severity of ID, epilepsy and cerebral palsy are available in appendix</i></p>                         | <p><b>SMR 3.3 (95% CI 2.0, 5.5)</b></p>                                                                       |                      | <p>people with both epilepsy and ID</p>                                                                                                                                                                                                                                                                                                                                                                                                                                                                                                      |                      |                      |
| <p>Glover et al (2017)<sup>8</sup></p> | <p>N=664 deaths for people with ID (all ages) over 59,279.7 person-years<br/>Crude rate 11.2 (10.4, 12.1) per 1000 person-years<br/><b>SMR 3.18 (2.94, 3.43)</b><br/><b>Women 3.40 (3.02, 3.81)</b><br/><b>Men 3.03 (2.73, 3.35)</b></p> | <p>N=114 deaths from respiratory causes for people with ID vs 23.3 expected<br/><b>SMR 4.9 (4.0, 5.9)</b></p> | <p>Not available</p> | <p>N=57 / 114 (50%) of respiratory deaths (and 8.6% of all deaths) were from influenza and pneumonia, vs expected 7.4 deaths<br/><b>SMR 7.7 (5.8, 9.9)</b><br/>Vast majority of pneumonia were unspecified (organism) n=24 / 114 (21%) respiratory deaths (3.6% of all deaths) were due to pneumonitis due to solids / liquids vs expected 1.1 deaths<br/><b>SMR 21.8 (13.9, 32.4)</b><br/><br/>N=12 (1.8%) of all deaths were due to respiratory and intrathoracic cancers vs expected 16.6 deaths<br/><b>SMR 0.7, 95% CI 0.4–1.3).</b></p> | <p>Not available</p> | <p>Not available</p> |

39  
40  
41  
42  
43  
44  
45  
46

1  
2

|                                                                                                                                                            |                                                                                                                                                                                                                                                                                                                                           |                                                                                                                                         |               |                                                                                                                                                                                                                                                                                                                |               |                                       |
|------------------------------------------------------------------------------------------------------------------------------------------------------------|-------------------------------------------------------------------------------------------------------------------------------------------------------------------------------------------------------------------------------------------------------------------------------------------------------------------------------------------|-----------------------------------------------------------------------------------------------------------------------------------------|---------------|----------------------------------------------------------------------------------------------------------------------------------------------------------------------------------------------------------------------------------------------------------------------------------------------------------------|---------------|---------------------------------------|
| 3 Heslop et al<br>4 (2014) <sup>6</sup><br>5<br>6<br>7<br>8<br>9<br>10<br>11<br>12<br>13<br>14<br>15<br>16<br>17<br>18<br>19<br>20<br>21<br>22<br>23<br>24 | N= 247<br>deaths in<br>people with<br>ID aged 4+<br>Rate of<br>death 16·2<br>per 1000<br>person years<br>Median age<br>of death: 64<br>(52, 75).<br><i>Additional;<br/>all-cause<br/>mortality for<br/>sex, ID<br/>severity,<br/>amenable<br/>mortality,<br/>patient care,<br/>&amp;<br/>accommodat<br/>ion available<br/>in appendix</i> | n=37 (15%)<br>deaths had<br>underlying<br>cause due to<br>respiratory<br>diseases,<br>vs 14·0%<br>England &<br>Wales deaths<br>(p=0·66) | Not available | Not available                                                                                                                                                                                                                                                                                                  | Not available | Reduced smoking in ID group<br>p=0·02 |
| 25 Hollins et al<br>26 (1998) <sup>11</sup><br>27<br>28<br>29<br>30<br>31<br>32<br>33<br>34<br>35<br>36<br>37<br>38<br>39                                  | 270/2,026<br>(13·3%)<br>deaths<br>116/1,081<br>(10·7%)<br>deaths on<br>Wandsworth<br>register<br>154/945<br>(16·3%)<br>deaths on<br>Kensington<br>register                                                                                                                                                                                | Not available                                                                                                                           | Not available | Bronchopneumonia: N=56<br>(48%) (Wandsworth)<br>N=69 (45%) (Kensington)<br>COPD Emphysema:<br>N=1 (Wandsworth)<br>N=1 (Kensington)<br>Asphyxia:<br>N=4 (Wandsworth)<br>N=1 (Kensington)<br>Respiratory other:<br>N=4 (Wandsworth)<br>N=4 (Kensington)<br><br>52% of all deaths had a<br>diagnosis of pneumonia | Not available | Not available                         |

43  
44  
45  
46

1  
2

|                                      |                                                                   |                                                                                |                                                                                                                                                                                                                                                                                                                                                                                                                                                                                                                                                                                                                                                                         |                                                                                                                                                                                                                                                          |                                                                                                              |               |
|--------------------------------------|-------------------------------------------------------------------|--------------------------------------------------------------------------------|-------------------------------------------------------------------------------------------------------------------------------------------------------------------------------------------------------------------------------------------------------------------------------------------------------------------------------------------------------------------------------------------------------------------------------------------------------------------------------------------------------------------------------------------------------------------------------------------------------------------------------------------------------------------------|----------------------------------------------------------------------------------------------------------------------------------------------------------------------------------------------------------------------------------------------------------|--------------------------------------------------------------------------------------------------------------|---------------|
| 3 Hosking et al (2016) <sup>24</sup> | 656/ 16666 (3·9%) deaths<br><b>HR = 3·62 (95% CI; 3·33, 3·93)</b> | 123/ 16666 (18·8%, rate= 24·8) deaths<br><b>HR = 6·68 (95% CI; 5·38, 8·29)</b> | Down syndrome = 24/ 1793 (20·3%) deaths.<br>General population: 135/ 113562 (rate= 3·9) deaths.                                                                                                                                                                                                                                                                                                                                                                                                                                                                                                                                                                         | Pneumonia; n = 67/ 16666 (rate = 13·5)<br>Aspiration pneumonitis; n = 21/ 16666 (rate = 4·2)                                                                                                                                                             | General population: Pneumonia; 39/ 113562 (rate = 1·1)<br>Aspiration pneumonitis; n = 6/ 113562 (rate = 0·2) | Not available |
| 9 Janicki et al (1999) <sup>22</sup> | 2,752 deaths in the group aged 40+/4,183 all-age deaths (66%)     | 40+ year olds: N=548 (20%), rate: 201 per 100,000                              | Increasing by age decade: aged 40s: 343 per 100,000 (16% of those who died) aged 50s: 793 per 100,000 (20%) aged 60s 1660 per 100,000 (25%) aged 70+: 3441 per 100,000<br>Males with ID rate of death: 257 per 100,000<br>Females with ID rate of death: 331 per 100,000<br>Respiratory causes did not vary over the 10-year study period. Deaths due to respiratory diseases increased, with increasing age.<br>Gender: breathing obstructions were more prevalent among males.<br>Gender x age: respiratory disease was increased in the oldest groups, for males particularly while respiratory disease remained static as a cause of death for females across ages. | Breathing obstructions – 2·7% average deaths per year across 10 years, N=75, rate=27·5 per 100,000<br>Respiratory disease types: pneumonia was the most prevalent type of respiratory cause of death, with 43% of respiratory disease deaths in ID group | Not available                                                                                                | Age, gender   |
| 38 Ng et al. (2017) <sup>12</sup>    | 4,738/15,289 deaths in                                            | 807/4,738 (17%) respiratory                                                    | ID rate: 423 per 100,000<br>DS rate: 3,187 per 1,000                                                                                                                                                                                                                                                                                                                                                                                                                                                                                                                                                                                                                    | ID group (excludes DS)                                                                                                                                                                                                                                   | Not available                                                                                                | Not available |

41  
42  
43  
44  
45  
46

1  
2  
3  
4  
5  
6  
7  
8  
9  
10  
11  
12  
13  
14  
15  
16  
17  
18  
19  
20  
21  
22  
23  
24  
25  
26  
27  
28  
29  
30  
31  
32  
33  
34  
35  
36  
37  
38  
39  
40  
41  
42  
43  
44  
45  
46

|                                    |                                     |                                                                  |                                                                                                                                                                                                                                                               |                                                                                                                                                                                                                                                                                                                                                                                                                                                  |               |               |
|------------------------------------|-------------------------------------|------------------------------------------------------------------|---------------------------------------------------------------------------------------------------------------------------------------------------------------------------------------------------------------------------------------------------------------|--------------------------------------------------------------------------------------------------------------------------------------------------------------------------------------------------------------------------------------------------------------------------------------------------------------------------------------------------------------------------------------------------------------------------------------------------|---------------|---------------|
|                                    | people aged 55+ (31%)               | deaths for those with ID<br><b>HR =12.5 (10.9, 14.2)</b>         |                                                                                                                                                                                                                                                               | <p>Pneumonitis due to solids and liquids: 10%, rate 25 per 100,000</p> <p>Pneumonia: 50%, rate 129 per 100,000</p> <p>Other chronic obstructive pulmonary disease: 20%, 49 per 100,000</p> <p>DS group</p> <p>Pneumonitis due to solids and liquids 31.4%, 181 per 100,000</p> <p>Pneumonia 20%, 113 per 100,000</p> <p>Asthma 8%, 45 per 100,000</p> <p>Bronchitis 8%, 45 per 100,000</p> <p>Other respiratory disorders 8%, 45 per 100,000</p> |               |               |
| Oppewal et al (2018) <sup>27</sup> | 207/1050 ID=19.7%; 54/ 149 DS=26.1% | 69/159 ID=44.3%; 33/45 DS only=73.3%; 36/114 ID with no DS=31.6% | 5-year age bands:<br>50-54 ID=100% GP=3.3%; 55-59 ID=26.5% GP=4.7%; 60-64 ID=51.4% GP=6.0%; 65-69 ID=30.4% GP=6.7%; 70-74 ID=23.8% GP=8.6%; 75-79 ID=12.5% GP=9.4%; 80-84 ID=26.3% GP=9.4%; 85-90 ID=(0) GP=9.9%; 90-95 ID=40% GP=10.4%; 95+ ID=100% GP=10.9% | Pneumonia ID=80.4%; Chronic obstructive pulmonary diseases ID=17.6%                                                                                                                                                                                                                                                                                                                                                                              | Not available | Not available |

1  
2  
3  
4  
5  
6  
7  
8  
9  
10  
11  
12  
1314 Patja et al  
15 (2001)<sup>14</sup>16  
17  
18  
19  
20  
21  
22  
23  
24  
25  
26  
27  
28  
29  
30  
31

|                      |                                                                                                                                                                             |                                                                                                                                                                                                                                                                                                                                                     |                                                                                                                                                                                                                                |                                                                                                                                                                                                                                                                                                                                       |                                                               |  |
|----------------------|-----------------------------------------------------------------------------------------------------------------------------------------------------------------------------|-----------------------------------------------------------------------------------------------------------------------------------------------------------------------------------------------------------------------------------------------------------------------------------------------------------------------------------------------------|--------------------------------------------------------------------------------------------------------------------------------------------------------------------------------------------------------------------------------|---------------------------------------------------------------------------------------------------------------------------------------------------------------------------------------------------------------------------------------------------------------------------------------------------------------------------------------|---------------------------------------------------------------|--|
|                      |                                                                                                                                                                             | groups of primary causes of death were neoplasms (31%), circulatory diseases (28%) and respiratory diseases (9%). No SMR available.                                                                                                                                                                                                                 |                                                                                                                                                                                                                                |                                                                                                                                                                                                                                                                                                                                       |                                                               |  |
| 1111/ 2369 ID =46.9% | Immediate cause 322/1093 ID=29%;<br><br>Primary cause 241/1095 ID=22%<br><br>Respiratory diseases second largest cause of ID death<br><br><b>SMR=3.76 (CI 3.31 to 4.27)</b> | Male:<br>age 2-19 <b>SMR=5.8 (4.4 – 15.6);</b><br>age 20-39 <b>SMR=5.4 (2.9 – 8.0);</b><br>age 40-59 <b>SMR=5.5 (3.5-7.5);</b><br>age 60+ <b>SMR=2.7 (2.7 – 4.8)</b><br><br>Female:<br>age 2-19 <b>SMR=4.3 (0.3 – 4.7);</b><br>age 20-39 <b>SMR=3.2 (1.1 – 5.1);</b><br>age 40-59 <b>SMR=6.2 (4.1 – 8.2);</b><br>age 60+ <b>SMR=3.3 (1.7 – 3.0)</b> | Pneumonia ID=83%;<br>Chronic obstructive pulmonary disease ID=11%.                                                                                                                                                             | Pneumonia deaths (%):<br>Profound ID=29%;<br>Severe ID=13%;<br>Moderate ID=33%;<br>Mild ID=25%.<br><br>Risk ratios compared to general population:<br>Mild ID 2.6 times higher;<br>Profound ID 5.8 times higher.<br>ID men higher risk than women in younger age groups (< 39 years), but at lower risk from 60 years of age onwards. | Age, gender (all respiratory)<br>ID severity (with pneumonia) |  |
| 216 deaths           | Immediate cause of death 97/216 ID=45%<br><br>Primary cause 14/216 ID= 6%.<br><br>Respiratory diseases were                                                                 | age 0-14 SMR=0.48;<br>age 15-44 SMR=3.46;<br>age 45-74 SMR=2.35;<br>age 75 SMR=0                                                                                                                                                                                                                                                                    | Bronchopneumonia (immediate cause) ID=43%<br>Five patients had died of pneumonia caused by aspiration. In one case fatal pneumonia had been caused by a fistula between the bronchus and the pleura.<br>Besides pneumonia, two | Not available                                                                                                                                                                                                                                                                                                                         | Age (all respiratory)                                         |  |

32 Raitaus et  
33 al (1997)<sup>13</sup>34  
35  
36  
37  
38  
39  
4041  
42  
43  
44  
45  
46

1  
2  
3  
4  
5  
6  
7  
8  
9  
10  
11  
12  
13  
14  
15  
16  
17  
18  
19  
20  
21  
22  
23  
24  
25  
26  
27  
28  
29  
30  
31  
32  
33  
34  
35  
36  
37  
38  
39  
40  
41  
42  
43  
44  
45  
46

|                                    |                                                                |                                                                                                                                                                                          |                                                                                                                                                                                 |                                                                                                                                                                                                                                                                                                                 |                                                                                           |               |
|------------------------------------|----------------------------------------------------------------|------------------------------------------------------------------------------------------------------------------------------------------------------------------------------------------|---------------------------------------------------------------------------------------------------------------------------------------------------------------------------------|-----------------------------------------------------------------------------------------------------------------------------------------------------------------------------------------------------------------------------------------------------------------------------------------------------------------|-------------------------------------------------------------------------------------------|---------------|
|                                    |                                                                | the dominant causes of ID death.<br><br><b>SMR=2.15 (CI 1.18 – 3.61)</b>                                                                                                                 |                                                                                                                                                                                 | patients had acute laryngitis and one patient had hyperplasia of the lymph nodes of the lungs as the immediate cause of death. The latter had trisomy of chromosome 13 (Patau's syndrome) as the basic disorder.                                                                                                |                                                                                           |               |
| Smith et al (2020) <sup>10</sup>   | N = 106 (0.6%) deaths<br><b>SMR = 11.6 (95% CI; 9.6, 14.0)</b> | Underlying cause of death: N = 8/ 106 (8%) deaths<br>All-contributing factors in death: n = 55. <b>CMR = 81.7 (95% CI; 62.7, 106.4) deaths</b><br><b>SMR = 55.3 (95% CI; 42.5, 72.1)</b> | Underlying cause of death: General population: 17/ 458 (4%) deaths<br>All-contributing factors in death: General population: n = 51. <b>CMR = 1.4 (95% CI; 1.1, 1.8) deaths</b> | Underlying cause of death: Pneumonia including influenza; <5/ 106<br>All-contributing factors in death: Pneumonia= 27/ 106 (25.5%) deaths<br>Respiratory failure; 17/ 106 (16.0%) deaths<br>Respiratory disorders = 15/ 106 (14.2%) deaths<br>Pneumonitis associated with food and vomit = 9/ 106 (8.5%) deaths | General populations: All-contributing factors in death: Pneumonia = 21/ 458 (4.6%) deaths | Not available |
| Trollor et al (2017) <sup>25</sup> | 732 / 19362 ID=4%<br><b>SMR=1.3 (1.2 to 1.5)</b>               | 632/732 ID=86.3% had cause of death information<br><br>78 ID=12% 4 <sup>th</sup> top cause using the ID ABI conversion<br><br>130 ID=20% 1st top using the ID revised version            | Not available                                                                                                                                                                   | Not available                                                                                                                                                                                                                                                                                                   | Not available                                                                             | Not available |

1  
2  
3  
4  
5  
6  
7  
8  
9  
10  
11  
12  
13  
14  
15  
16  
17  
18  
19  
20  
21  
22  
23  
24  
25  
26  
27  
28  
29  
30  
31  
32  
33  
34  
35  
36  
37  
38  
39  
40  
41  
42  
43  
44  
45  
46

|                                        |                                                         |                                                           |               |                                                                                                                           |                                                                                                         |        |
|----------------------------------------|---------------------------------------------------------|-----------------------------------------------------------|---------------|---------------------------------------------------------------------------------------------------------------------------|---------------------------------------------------------------------------------------------------------|--------|
|                                        |                                                         | 16 ID=3% of respiratory deaths were considered avoidable. |               |                                                                                                                           |                                                                                                         |        |
|                                        |                                                         | 26242 GP=9% 3rd top underling cause                       |               |                                                                                                                           |                                                                                                         |        |
| Tyrer & McGrother (2009) <sup>23</sup> | 503/ 2995 (17%) deaths<br>SMR=2.77 (95% CI 2.53, 3.03). | SMR=5.46 (95% CI 4.58, 6.46)                              | Not available | Bronchopneumonia; SMR=6.47 (95% CI 5.00 8.23), O=66, E=10.2. Other respiratory; SMR=4.64 (CI 3.58 to 5.91). O=65, E=14.0. | Male; SMR=2.28 (95% CI; 2.02-2.56) O=278, E=121.8. Female; SMR=3.24 (95% CI; 2.83-3.69). O=225, E=69.4. | Gender |

\*only where adjusted specifically for respiratory mortality  
 SMR=standardised mortality ratio/ CI=confidence interval/ RR=rate ratio/ HR=hazard ratio/CMF=comparative mortality figure/ OR=odds ratio/ O=observed deaths/ E=expected death

## Study characteristics

Key features of all studies identified for inclusion in the review were tabulated (Table 1). These were cohort studies (n=12), case control studies (n=4) and one population-based audit of deaths in adults and children. These studies report data on 90,302 people with intellectual disabilities and 27,394 deaths. The average study size was 9,250 people. These studies were from the Netherlands (n = 1), Finland (n = 2), Australia (n = 3), the United Kingdom (n = 7), the United States of America (n = 1), Sweden (n = 2) and Denmark (n = 1).

## Definition of respiratory disorder

Thirteen out of 17 (76%) studies defined the respiratory disorder using ICD 9 -chapter codes[13-15,22,23] and ICD 10 – chapter codes for respiratory disorders.[8,10,12,23-26] The remaining four studies included in the systematic review did not define respiratory disorders according to an operational system.

## Individual respiratory disorders

Thirteen papers reported on deaths from individual respiratory disorders.[8,10-15,22-24,26-28] Pneumonia was reported as a cause of death in 12 studies.[8,10-15,22,23,26,27], five studies reported deaths from pneumonitis related to aspiration[8,10,12,14,24], five studies reported on chronic obstructive pulmonary disease (COPD)[11,12,14,26,27], one study reported on asthma<sup>31</sup> and one reported respiratory cancer deaths.[8]

## Evidence synthesis

### Respiratory-associated mortality

Five papers reported that respiratory disorders were the dominant cause of death in people with intellectual disabilities.[11,13,27,28,30] A further three studies found that deaths from respiratory disorders were the second most common cause of death.[12,14,24] Respiratory-associated deaths were in the top five main causes of deaths for a further four papers.[9,10,22,25] Comparative results (intellectual disabilities vs general population) for deaths due to respiratory disorders were reported in 10/17 (59%) of the studies.[5,8-10,12,22,24-26] In the majority of these studies rates of death from respiratory disorders were higher for people with intellectual disabilities than for people in the general population. However, Troller et al. (2017)[25] reported that respiratory-associated deaths in the general population were (9%) similar to the population with intellectual disabilities (12%). Hollins et



1  
2  
3 al. (1998)[11] also reported that respiratory disorders were the most commonly cited cause of  
4 death for both groups.  
5

### 6 7 **Individual respiratory disorders and mortality**

8  
9 Pneumonia was reported as the most common cause of respiratory death in people with  
10 intellectual disabilities.[8,10-15,22-24,26,27] Contributors to pneumonia deaths included  
11 influenza and injury from inhalation and aspiration events.[10,14] Pneumonitis featured as an  
12 underlying or contributing cause for between eight and 21% of respiratory-associated deaths in  
13 people with intellectual disabilities.[8,10,12] Crude comparison data showed people with  
14 intellectual disabilities were much more likely (between 10 and 20 times) to die from  
15 pneumonitis.[24,26] COPD was found to be a common cause of death in two studies focussing  
16 on older adults.[12,27]  
17  
18  
19  
20  
21  
22  
23  
24

### 25 **Factors contributing to respiratory-associated deaths experienced by people with** 26 **intellectual disabilities**

27  
28 Only four out of 17 (23.5%) papers directly reported on factors associated with the risk of  
29 respiratory-associated deaths[14,22,23,30] (see Table 2). Sex was identified as a significant  
30 factor in respiratory deaths in all four studies; however, the results were not consistent across  
31 all studies.[14,22,23,30] Level of intellectual disabilities was only reported as associated with  
32 respiratory related deaths in one study with 35 year follow up.[14] This study found that, when  
33 compared to the general population, the risk of respiratory related deaths was 2.6 times higher  
34 for people with mild intellectual disabilities and 5.8 times higher for people with profound and  
35 multiple intellectual disabilities.  
36  
37  
38  
39  
40  
41  
42  
43

44 Respiratory deaths amongst children and young people with intellectual disabilities were  
45 reported in five studies and found to be a common cause of death across all  
46 studies.[10,13,15,29,30] In studies comparing children and young people to a comparison group  
47 results were limited by small samples. Raitasuo et al. (1997) reported only one death.[13] Patja  
48 et al. (2001) reported higher SMR for males aged 2-19 years but not females.[20] Smith et al.  
49 reported 8% deaths had respiratory disease as the underlying cause but the SMR for underlying  
50 cause was not reported.[10]  
51  
52  
53  
54  
55  
56  
57

### 58 **Meta-analytical outcomes**

1  
2  
3 Ten studies[8,10-15,23,24,28] reported the necessary data and were included in the meta-  
4 analysis of respiratory mortality of people with intellectual disabilities and the general  
5 population. As Hollins (1998) reported the SMR of two separate cohorts, these are displayed  
6 separately in the relevant forest plots.[11] The pooled SMRs for respiratory mortality between  
7 people with intellectual disabilities and the general population was 10·86 (95% CI 5·32, 22·18).  
8  
9 The results indicate that respiratory mortality occurs ten times more frequently in the  
10 intellectual disabilities group than in the general population group, after adjustment (at the study  
11 level) for age and sex differences. There was evidence of considerable statistical heterogeneity  
12 between studies in the meta-analyses, with  $I^2=99\cdot0\%$ . Results are displayed in Figure 2.  
13  
14  
15  
16  
17  
18

### 19 **Insert Figure 2: Forest plot of respiratory associated mortality**

20  
21  
22  
23 As some studies focussed on adults only, while others included people of all ages, a sub-analysis  
24 was conducted of studies which reported data on an adult only population. The results of this  
25 sub-analysis are displayed in Figure 3. The pooled SMR reduced slightly from 10·86 (95% CI  
26 5·32,22·18) to 6·53 (95% CI 4·29,9·96), after one study with a sample of primarily children  
27 was excluded.[10] Studies which included both adults and children in their sample[8,11-15]  
28 were next removed one at a time. First, both cohorts from Hollins (1998) were removed and the  
29 pooled SMR was reduced by around half, from 9·15 to 4·80[11]. The further removal of studies  
30 by Glover (2017)[8], Patja (2001)[14] and Raitasuo (1997)[13] resulted in a final pooled SMR  
31 for adults of 5·85 (95% CI 4·73,7·22,  $p<0\cdot001$ ). Heterogeneity between studies was also  
32 reduced from  $I^2=99\%$  to  $I^2=56\%$  by the exclusion of samples which included children.  
33  
34  
35  
36  
37  
38  
39  
40  
41

### 42 **Insert figure 3: Forest plot for adults only**

43  
44  
45 A sub-analysis was conducted of studies which reported an SMR for pneumonia.[8,11,23] The  
46 pooled SMR for pneumonia mortality for people with intellectual disabilities compared to the  
47 general population was 26·65 (95% CI 5·63, 126·24,  $p<0\cdot001$ ). These results, displayed in  
48 Figure 4, indicate that pneumonia related mortality occurs much more frequently in people with  
49 intellectual disabilities than in the general population group. Evidence of considerable statistical  
50 heterogeneity between studies was also present in this sub-analysis with  $I^2=99\cdot0\%$ . SMRs were  
51 recalculated excluding the only study to include an adult only sample, Tyrer & McGrother  
52 (2009)[23] resulting in a substantial increase in pooled SMR (95% CI from 26·65 to 42·70).  
53  
54  
55  
56  
57  
58  
59  
60

## Insert figure 4: Forest plot for pneumonia related mortality

### Sensitivity analysis

Sensitivity analysis in relation to quality assessment was run for the ten studies included in the meta-analysis (Appendix 2). Studies which were rated as weak[13] or moderate[23] were removed from the analysis. The pooled SMR for mortality ratios changed slightly as Raitasuo (1997)[13] (from 10·81 to 12·67)[27] and then Tyrer and McGrother (2009) (from 12·67 to 13·94)[23] were removed from the analysis. As the change in SMR was small, this suggests that inclusion of weaker studies did not significantly change the results.

### Discussion

This systematic review and meta-analysis highlights that people with intellectual disabilities experience excess respiratory-associated deaths, with a respiratory mortality ten times greater than for the general population. Respiratory mortality was more prevalent among studies which include children, and pneumonia was a major contributor to the higher respiratory mortality reported in this study. Clinical guidelines have contributed to a reduction in mortality from community-acquired pneumonia.[31] We believe the evidence presented here highlights the need for clinical guideline development groups to make recommendations on reducing the risks of premature death due to community-acquired pneumonia amongst people with intellectual disabilities. Vaccination programmes for influenza can help to reduce respiratory mortality in children[32] and adults.[33] Although there is a relatively low uptake of influenza vaccine amongst people with intellectual disabilities, annual health-checks for people with intellectual disabilities have been reported to increase uptake of influenza immunisation.[34] People with intellectual disabilities should be identified as a high-risk group and immunisation providers should prioritise the improvement of vaccine uptake, for example through the roll-out of health checks. People with intellectual disabilities are at increased risk of recurrent chest infections which are secondary to dysphagia[35,36] with a high proportion of aspiration pneumonia-related deaths occurring among individuals with severe and profound intellectual disabilities.[5,22,35,37,38] Increased recognition of the link between dysphagia and respiratory disorders among caregivers and practitioners is critical to ensuring the early identification of individuals with respiratory disorders.

The higher risk of death from respiratory disorders, such as pneumonia, for people with intellectual disabilities is a significant concern in relation to the rapidly developing COVID-19

1  
2  
3  
4  
5  
6  
7  
8  
9  
10  
11  
12  
13  
14  
15  
16  
17  
18  
19  
20  
21  
22  
pandemic. Urgent action to disaggregate data on deaths from COVID-19 for people with intellectual disabilities and to investigate factors associated with COVID-19 related mortality for people with intellectual disabilities is vital to ensure that clinical guidelines are based on consideration of the specific risks faced by people with intellectual disabilities. Research is urgently required to investigate the risk factors associated with COVID-19 for people with intellectual disabilities to ensure carers and clinicians have access to the best evidence to reduce the risk of infection in those most vulnerable and to inform the clinical management of those who contract COVID-19. Carers and clinical staff must be given training to ensure they understand the human rights and health care needs of people with intellectual disabilities to ensure that existing stark disparities in the health of people with intellectual disabilities are not widened during this crisis.

23  
24  
25  
26  
27  
28  
29  
30  
31  
32  
33  
34  
35  
36  
37  
38  
39  
40  
41  
Interventions should focus on the pediatric age group. Among the studies included in this meta-analysis we found a relationship between inclusion of children and SMRs from respiratory causes, with those studies including children reporting higher SMRs. This is consistent with studies that have reported higher SMRs in children compared with adults in epilepsy[15] and cerebral palsy.[39] Overall, mortality in childhood is very low relative to adulthood, and in the pediatric age group chronic disabling conditions such as intellectual disability, epilepsy and cerebral palsy all have a marked impact on SMR. Co-morbidity with epilepsy and cerebral palsy are likely to be significant modifiers of the relationship between intellectual disability and respiratory mortality. Children with more severe intellectual disability are more likely to have epilepsy and cerebral palsy, both of which are independent risk factors for respiratory mortality.

### 42 43 44 **Study strengths and limitations**

45  
46  
47  
48  
49  
50  
51  
52  
53  
54  
55  
56  
57  
58  
59  
60  
Our study has several strengths. The meta-analysis included mortality ratios from ten observational studies covering 1,844 respiratory deaths in people with intellectual disabilities, which has improved the power and precision to answer this important research question. A rigorous and systematic analysis process was undertaken, and we minimised the risk of bias, errors and omissions by having two or more reviewers conduct comprehensive searches, assess study quality and extract descriptive data. While heterogeneity was found, due to methodological and clinical diversity including study design, age and study nationality, this is common in meta-analyses and statistical heterogeneity was inevitable.[20] Most of the research was conducted in Western countries, thus limiting the extent to which the findings may generalise to non-Western countries. Furthermore, ethnicity was not reported widely which

1  
2 prevented further analysis. There was variation among studies on how mortality was examined  
3 and how deaths were reported. We were not able to perform meta-regression on predictors or  
4 factors reported in studies which increase SMRs for respiratory deaths (age, sex, place of death,  
5 or severity of intellectual disabilities). Improved reporting of these in studies of general  
6 mortality also would benefit future research.  
7  
8  
9  
10

11  
12 These findings signify the urgent need to develop and implement evidence-informed strategies  
13 to reduce premature mortality among people with intellectual disabilities. Respiratory disorders  
14 are a major cause of death for people with intellectual disabilities, many of which are avoidable  
15 with improved public health initiatives and access to good quality health and social care.  
16 However, further research is required to understand both the multifactorial causes of this  
17 heightened risk as well as the most effective approaches for the multi-professional clinical  
18 management of these risks.  
19  
20  
21  
22  
23  
24  
25

26 **Contributors:** MT, CM, AM, ER, LHM, DK, KD, GSS, AH & FB had full access to all the  
27 data, contributed to the systematic review and meta-analysis of studies, interpretation of  
28 results and the manuscript. JS and BJ helped interpret the result of the study and contributed  
29 to the manuscript. MT is study guarantor. All authors reviewed the final manuscript and  
30 agreed to be accountable for all aspects of the work and approved the final manuscript for  
31 submission. The corresponding author attests that all listed authors meet the authorship  
32 criteria and that no others meeting the criteria have been omitted.  
33  
34  
35  
36  
37  
38  
39

40 **Funding** The Scottish Government (HSCD 169698)  
41  
42

43 **Competing interests** None declared.  
44  
45

46 **Patient consent for publication** Not required  
47  
48

49 **Ethics** Not required as this systematic review and meta-analysis was based on published data  
50  
51  
52

53 **Provenance and peer review:** Not commissioned; externally peer reviewed  
54  
55

56 **Data availability statement:** All data relevant to the study are included in the article or  
57 uploaded as supplementary information.  
58  
59  
60

## ORCID IDs

Maria Truesdale 0000-0003-3081-7858  
Craig Melville 0000-0001-7234-2382  
Kirsty Dunn 0000-0003-1701-2190  
Angela Henderson 0000-0002-6146-3477  
Laura Hughes-McCormack 0000-0001-9498-8045  
Arlene McGarty 0000-0003-4937-0574  
Ewelina Rydzewska 0000-0002-9749-3133  
Gillian Smith 0000-0001-7241-695  
Joseph Symonds 0000-0002-2141-4216  
Bhautesh Jani 0000-0001-7348-514x  
Deborah Kinnear 0000-0002-2626-1554

## Figure captions

Figure 1: PRISMA flow diagram of systematic search and selection. A total of 2286 records were retrieved through a search of Embase, ISI Web of Science (all databases), CINAHL, and PsycINFO with an additional 9 records identified through other sources. After removing 241 duplicates, 2025 records were excluded due to ineligible types., the remaining 29 were retrieved as full-texts. From these 17 were included in the narrative review and 10 included in the meta-analysis.

Figure 2: Forest plot of respiratory associated mortality. The pooled SMRs for respiratory mortality between people with intellectual disabilities and the general population was 10·86 (95% CI 5·32, 22·18). There was considerable statistical heterogeneity between studies in the meta-analyses, with  $I^2= 99\cdot0\%$ .

Figure 3: Forest plot for adults only. The pooled SMR for adults only was 5·85 (95% CI 4·73,7·22,  $p<0\cdot001$ ). Heterogeneity between studies was also reduced from  $I^2=99\%$  to  $I^2= 56\%$  by the exclusion of samples which included children.

Figure 4: Forest plot for pneumonia related mortality. The pooled SMR for pneumonia mortality for people with intellectual disabilities compared to the general population was 26·65 (95% CI 5·63, 126·24,  $p<0\cdot001$ ). Evidence of considerable statistical heterogeneity between studies was also present in this sub-analysis with  $I^2= 99\cdot0\%$ .

## References

- 1 Harris JC. Intellectual disability: Understanding its development, causes, classification, evaluation, and treatment. Oxford: Oxford University Press, 2006.
- 2 Maulik PK, Mascarenhas MN, Mathers CD, Dua T, Saxena S. Prevalence of intellectual disability: a meta-analysis of population-based studies. *Res Dev Disabil* 2011; **32(2)**: 419-36
- 3 Organisation W. The ICD-10 classification of mental and behavioural disorders. Clinical descriptions and diagnostic guidelines. Geneva: World Health Organisation, 1992.
- 4 World Health Organization. World health statistics 2015. Geneva: World Health Organization, 2015.
- 5 Heslop P, Blair P, Fleming P, Hoghton M, Marriott A, Russ L. Confidential Inquiry into premature deaths of people with learning disabilities (CIPOLD) Final Report <http://www.bristol.ac.uk/cipold/fullfinalreport.pdf> (2013) (accessed June 25, 2020).
- 6 Heslop P, Blair PS, Fleming P, Hoghton M, Marriott A, Russ L. The Confidential Inquiry into premature deaths of people with intellectual disabilities in the UK: a population-based study. *Lancet* 2014; **383(9920)**: 889-95.
- 7 O'Leary L, Cooper SA, Hughes-McCormack L. Early death and causes of death of people with intellectual disabilities: a systematic review. *J Appl Res Intellect Disabil* 2018; **31(3)**: 325-42.
- 8 Glover G, Williams R, Heslop P, Oyinlola J, Grey J. Mortality in people with intellectual disabilities in England. *J Intellect Disabil Res* 2017; **61(1)**: 62-74.
- 9 Tyrer F, Smith LK, McGrother CW. Mortality in adults with moderate to profound intellectual disability: a population-based study. *J Intellect Disabil Res* 2007; **51(7)**: 520-7.
- 10 Smith GS, Fleming M, Kinnear D, Henderson A, Pell JP, Melville C, Cooper S-A. Rates and causes of mortality among children and young people with and without intellectual disabilities in Scotland: a record linkage cohort study of 796,190 schoolchildren. *BMJ Open* 2020 (Accepted for Publication) DOI:10.1136/bmjopen-2019-034077.
- 11 Hollins S, Attard MT, Fraunhofer Nv, McGuigan S, Sedgwick. Mortality in people with learning disability: risks, causes, and death certification findings in London. *Dev Med Child Neurol* 1998; **40(1)**: 50-6.

- 12 Ng N, Wallén EF, Ahlström G. Mortality patterns and risk among older men and women with intellectual disability: a Swedish national retrospective cohort study. *BMC Geriatr* 2017; **17(1)**: 269.
- 13 Raitasuo J, Mölsä P, Raitasuo S, Mattila K. Deaths among the intellectually disabled: A retrospective study. *J Appl Res Intellect Disabil* 1997; **10(4)**: 280-8.
- 14 Patja K, Mölsä P, Iivanainen M. Cause-specific mortality of people with intellectual disability in a population-based, 35-year follow-up study. *J Intellect Disabil Res* 2001; **45(1)**: 30-40.
- 15 Forsgren L, Edvinsson SO, Nyström L, Blomquist HK. Influence of epilepsy on mortality in mental retardation: an epidemiologic study. *Epilepsia* 1996; **37(10)**: 956-63.
- 16 Moher D, Liberati A, Tetzlaff J, Altman DG. Preferred reporting items for systematic reviews and meta-analyses: the PRISMA statement. *Int J Surg* 2010; **8(5)**: 336-41.
- 17 Kmet LM, Cook LS, Lee RC. Standard quality assessment criteria for evaluating primary research papers from a variety of fields. HTA Initiative #13. Edmonton: Alberta Heritage Foundation for Medical Research, 2004.
- 18 Shea BJ, Bouter LM, Peterson J, Boers M, Andersson N, Ortiz Z, et al. External validation of a measurement tool to assess systematic reviews (AMSTAR). *PLoS One* 2007; **2(12)**: e1350. DOI:10.1371/journal.pone.0001350.
- 19 Borenstein M, Higgins JP, Hedges LV, Rothstein HR. Basics of meta-analysis: I<sup>2</sup> is not an absolute measure of heterogeneity. *Res Synth Methods* 2017; **8(1)**: 5-18.
- 20 Higgins JP, Thompson SG, Deeks JJ, Altman DG. Measuring inconsistency in meta-analyses. *BMJ* 2003; **327(7414)**: 557-60.
- 21 Borenstein M. Common mistakes in meta-analysis and how to avoid them. New Jersey: Biostat. Inc, 2019: 388.
- 22 Janicki MP, Dalton AJ, Henderson CM, Davidson PW. Mortality and morbidity among older adults with intellectual disability: health services considerations. *Disabil Rehabil* 1999; **21(5-6)**: 284-94.
- 23 Tyrer F, McGrother C. Cause-specific mortality and death certificate reporting in adults with moderate to profound intellectual disability. *J Intellect Disabil Res* 2009; **53(11)**: 898-904.
- 24 Hosking FJ, Carey IM, Shah SM, Harris T, DeWilde S, Beighton C, et al. Mortality among adults with intellectual disability in England: comparisons with the general population. *Am J Public Health* 2016; **106(8)**: 1483-90.



- 1  
2  
3 25 Trollor J, Srasuebkul P, Xu H, Howlett S. Cause of death and potentially avoidable deaths  
4 in Australian adults with intellectual disability using retrospective linked data. *BMJ Open*  
5 2017; **7(2)**: e013489. DOI:10.1136/bmjopen-2016-013489.  
6  
7  
8 26 Brameld K, Spilsbury K, Rosenwax L, Leonard H, Semmens J. Use of health services in  
9 the last year of life and cause of death in people with intellectual disability: a retrospective  
10 matched cohort study. *BMJ Open* 2018; 8(2):e020268. DOI:10.1136/bmjopen-2017-  
11 020268.  
12  
13  
14 27 Oppewal A, Schoufour JD, van der Maarl HJ, Evenhuis HM, Hilgenkamp TI, Festen DA.  
15 Causes of mortality in older people with intellectual disability: results from the HA-ID  
16 study. *Am J Intellect Dev Disabil* 2018; **123(1)**: 61-71.  
17  
18  
19 28 Cooper S-A, Allan L, Greenlaw N, McSkimming, P, Jasilek A, Henderson et al. Rates,  
20 causes, place and predictors of mortality in adults with intellectual disabilities with and  
21 without Down syndrome: cohort study with record linkage. *BMJ Open* 2020 (Accepted for  
22 Publication).  
23  
24  
25 29 Patja K, Iivanainen M, Vesala H, Oksanen H, Ruoppila I. Life expectancy of people with  
26 intellectual disability: a 35-year follow-up study. *J Intellect Disabil Res* 2000; **44(5)**: 591-  
27 9.  
28  
29  
30 30 Durvasula S, Beange H, Baker W. Mortality of people with intellectual disability in  
31 northern Sydney. *J Intellect Dev Disabil* 2002; **27(4)**: 255-64.  
32  
33  
34 31 Mandell LA, Wunderink RG, Anzueto A, Bartlett JG, Campbell GD, Dean NC et al.  
35 Infectious Diseases Society of America/ American Thoracic Society consensus guidelines  
36 on the management of community-acquired pneumonia in adults. *Clin Infect Dis* 2007; **44**  
37 **(Suppl 2)**: S27-72.  
38  
39  
40 32 Flannery B, Reynolds SB, Blanton L, Santibanez TA, O'Halloran A, Lu PJ, et al.  
41 Influenza vaccine effectiveness against pediatric deaths: 2010–2014. *Pediatrics* 2017;  
42 **139(5)**: e20164244. DOI:10.1542/peds.2016-4244  
43  
44  
45 33 Backer JA, Wallinga J, Meijer A, Donker GA, Van der Hoek W, Van Boven M. The  
46 impact of influenza vaccination on infection, hospitalisation and mortality in the  
47 Netherlands between 2003 and 2015. *Epidemics* 2019 Mar 1;26:77-85.  
48  
49  
50 34 Robertson J, Hatton C, Emerson E, Baines S. The impact of health checks for people with  
51 intellectual disabilities: an updated systematic review of evidence. *Res Dev Disabil* 2014;  
52 **35(10)**: 2450-62.  
53  
54  
55 35 Chadwick DD, Jolliffe J. A descriptive investigation of dysphagia in adults with intellectual  
56 disabilities. *J Intellect Disabil Res* 2009; **53(1)**: 29-43.  
57  
58  
59  
60

- 1  
2  
3 36 Robertson J, Chadwick D, Baines S, Emerson E, Hatton C. Prevalence of dysphagia in  
4 people with intellectual disability: a systematic review. *Intellect Dev Disabil* 2017; **55(6)**:  
5 377-91.  
6  
7  
8 37 Durvasula, S, Beange H, Baker, W. Mortality of people with intellectual disability in  
9 northern Sydney. *J Intellect Dev Disabil* 2002; **27(4)**: 255-264.  
10 DOI:10.1080/1366825021000029311  
11  
12 38 Glover G, Ayub M. How people with learning disabilities die. Improving Health and Lives  
13 Learning Disabilities Observatory. Durham, 2010.  
14  
15 39 Blair E, Langdon K, McIntyre S, Lawrence D, Watson L. Survival and mortality in cerebral  
16 palsy: observations to the sixth decade from a data linkage study of a total population  
17 register and National Death Index. *BMC Neurol* 2019; **19(1)**: 111  
18  
19  
20  
21  
22  
23  
24  
25  
26  
27  
28  
29  
30  
31  
32  
33  
34  
35  
36  
37  
38  
39  
40  
41  
42  
43  
44  
45  
46  
47  
48  
49  
50  
51  
52  
53  
54  
55  
56  
57  
58  
59  
60

## Appendix 1: Search strategy

### Embase- Ovid, 2016-

| Search Terms |                                                                                                                                                                                                                                                                                                                                                                                                                                                                                                                                                                                                                                                                                                                                                                                                                                                                                                                                                                                                   |
|--------------|---------------------------------------------------------------------------------------------------------------------------------------------------------------------------------------------------------------------------------------------------------------------------------------------------------------------------------------------------------------------------------------------------------------------------------------------------------------------------------------------------------------------------------------------------------------------------------------------------------------------------------------------------------------------------------------------------------------------------------------------------------------------------------------------------------------------------------------------------------------------------------------------------------------------------------------------------------------------------------------------------|
| 1.           | developmental disorder/ or intellectual impairment/ or developmental disabilities/ or intellectual disability/ or mentally disabled persons/ or intellectual development disorder/ or "intellectual development disorder (attitudes toward)"/                                                                                                                                                                                                                                                                                                                                                                                                                                                                                                                                                                                                                                                                                                                                                     |
| 2.           | ((intellect\$ adj3 (deficien\$ or difficult\$ or disab\$ or disorder\$ or impair\$ or handicap\$ or incapacit\$ or handicap\$ or sub?average or sub?norm\$)) or (low\$2 adj2 intellect\$)).tw.                                                                                                                                                                                                                                                                                                                                                                                                                                                                                                                                                                                                                                                                                                                                                                                                    |
| 3.           | (learning adj3 (deficien\$ or difficult\$ or disab\$ or disorder\$ or handicap\$ or impair\$ or incapacit\$ or handicap\$ or sub?average or sub?norm\$)).tw.                                                                                                                                                                                                                                                                                                                                                                                                                                                                                                                                                                                                                                                                                                                                                                                                                                      |
| 4.           | (mental\$ adj3 (deficien\$ or disab\$ or handicap\$ or impair\$ or handicap\$ or incapacit\$ or retard\$ or sub?average or sub?norm\$)).tw.                                                                                                                                                                                                                                                                                                                                                                                                                                                                                                                                                                                                                                                                                                                                                                                                                                                       |
| 5.           | ((subaverage or sub\$1 average or subnormal or sub\$1 normal\$) adj3 (cognit\$ or intel\$)).tw.                                                                                                                                                                                                                                                                                                                                                                                                                                                                                                                                                                                                                                                                                                                                                                                                                                                                                                   |
| 6.           | ((development\$ or neurodevelopment\$) adj disab\$).tw.                                                                                                                                                                                                                                                                                                                                                                                                                                                                                                                                                                                                                                                                                                                                                                                                                                                                                                                                           |
| 7.           | (education\$ adj5 sub?norm\$).tw.                                                                                                                                                                                                                                                                                                                                                                                                                                                                                                                                                                                                                                                                                                                                                                                                                                                                                                                                                                 |
| 8.           | (cretin\$ or feeble minded\$ or imbecil\$ or moron\$).tw.                                                                                                                                                                                                                                                                                                                                                                                                                                                                                                                                                                                                                                                                                                                                                                                                                                                                                                                                         |
| 9.           | Or/ 1-9                                                                                                                                                                                                                                                                                                                                                                                                                                                                                                                                                                                                                                                                                                                                                                                                                                                                                                                                                                                           |
| 10.          | cause of death/ OR mortality/ OR fatal outcome/ OR death/ OR hospital mortality/ OR mortality.ti,ab OR fatal.ti,ab OR death.ti,ab                                                                                                                                                                                                                                                                                                                                                                                                                                                                                                                                                                                                                                                                                                                                                                                                                                                                 |
| 11.          | asthma/ OR asthma.ti,ab OR bronchial asthma.ti,ab OR asthma, bronchial.ti,ab OR pneumonia/ OR pneumonia.ti,ab OR lobar pneumonia.ti,ab OR lobar pneumonia.ti,ab OR pneumonia, lobar.ti,ab OR bacterial pneumonia/ OR pneumonia, bacterial.ti,ab OR viral pneumonia/ OR pneumonia, viral.ti,ab OR viral pneumonia.ti,ab OR bronchopneumonia/ OR bronchopneumonia.ti,ab OR bronchial pneumonia.ti,ab OR pneumonia, bronchial.ti,ab OR lung disease/ OR disease, lung.ti,ab OR pulmonary disease.ti,ab OR disease, pulmonary.ti,ab OR respiratory disease.ti,ab OR disease, respiratory.ti,ab OR chronic obstructive lung disease/ OR lung disease, obstructive.ti,ab OR obstructive lung disease.ti,ab OR obstructive lung diseases.ti,ab OR obstructive pulmonary diseases.ti,ab OR aspiration pneumonia/ OR aspiration pneumonia.ti,ab OR bronchiectasis/ OR bronchiectasis.ti,ab OR respiratory failure/ OR respiratory failure.ti,ab OR interstitial pneumonia/ Or interstitial pneumonia.ti,ab |
| 12.          | 9 and 10 and 11                                                                                                                                                                                                                                                                                                                                                                                                                                                                                                                                                                                                                                                                                                                                                                                                                                                                                                                                                                                   |

**Cinahl and APA PsychINFO - Ebscohost, 2016-**

| Search Terms |                                                                                                                                                                                                                                                                                                                                                                                                                                 |
|--------------|---------------------------------------------------------------------------------------------------------------------------------------------------------------------------------------------------------------------------------------------------------------------------------------------------------------------------------------------------------------------------------------------------------------------------------|
| 1.           | MH Intellectual disability                                                                                                                                                                                                                                                                                                                                                                                                      |
| 2.           | (MH “Mentally Disabled Persons”)                                                                                                                                                                                                                                                                                                                                                                                                |
| 3.           | TX (intellectual* N3 (disab* or disorder* or handicap* or impair* or deficien* or subnorm*))                                                                                                                                                                                                                                                                                                                                    |
| 4.           | TX (learning N3 (disab* or disorder* or impair* or difficlt*))                                                                                                                                                                                                                                                                                                                                                                  |
| 5.           | TX (development* N3 (disab* or disorder* or handicap* or impair* or delay*))                                                                                                                                                                                                                                                                                                                                                    |
| 6.           | TX (Mental* N3 (disab* or disorder* or handicap* or impair* or deficien* or subnorm* or retard*))                                                                                                                                                                                                                                                                                                                               |
| 7.           | ((development\$ or neurodevelopment\$) N disab\$.tw.                                                                                                                                                                                                                                                                                                                                                                            |
| 8.           | (education\$ N5 su?bnorm\$.tw.                                                                                                                                                                                                                                                                                                                                                                                                  |
| 9.           | (cretin\$ or feeble minded\$ or imbecil\$ or moron\$.tw.                                                                                                                                                                                                                                                                                                                                                                        |
| 10.          | S1 OR S2 OR S3 OR S4 OR S5 OR S6 OR S7 OR S8 OR S9 OR S10                                                                                                                                                                                                                                                                                                                                                                       |
| 11.          | cause of death/                                                                                                                                                                                                                                                                                                                                                                                                                 |
| 12.          | mortality/                                                                                                                                                                                                                                                                                                                                                                                                                      |
| 13.          | fatal outcome/                                                                                                                                                                                                                                                                                                                                                                                                                  |
| 14.          | death/                                                                                                                                                                                                                                                                                                                                                                                                                          |
| 15.          | hospital mortality/                                                                                                                                                                                                                                                                                                                                                                                                             |
| 16.          | mortality.ti.ab                                                                                                                                                                                                                                                                                                                                                                                                                 |
| 17.          | fatal.ti.ab                                                                                                                                                                                                                                                                                                                                                                                                                     |
| 18.          | death.ti.ab                                                                                                                                                                                                                                                                                                                                                                                                                     |
| 19.          | Or/ 11-18                                                                                                                                                                                                                                                                                                                                                                                                                       |
| 20.          | “pulmonary disease” or “airway disease” or “broncho-pulmonary disease” or “respiratory disease” or “lung disease” or “lung disorder” or “pulmonary disorder” or “respiratory disorder” or “pneumonia” or “bronchopneumonia” or “lung infection” or pulmonary infection” or respiratory infection” or “asthma” or “chronic obstructive pulmonary disease” or “aspiration pneumonia” or “bronchiectasis” or “respiratory failure” |
| 21.          | 10 and 19 and 20                                                                                                                                                                                                                                                                                                                                                                                                                |

Web of Science (All databases, including MEDLINE) 2016-current

TS= mortality OR death OR cause of death OR cause of mortality OR dead OR died  
AND

TS= intellectual disab\* or intellectual impair\* or developmental disab\* or learning disab\* or mental retard\* or mental handicap\*

AND

TS=asthma\* or bronchial asthma or pneumoni\* or lobar pneumoni\* or lobar pneumoni\* or bacterial pneumoni\* or viral pneumoni\* or bronchopneumonia\* or bronchial pneumoni\* or lung disease\* or lung disorder\* or lung infect\* or pulmonary disease\* or pulmonary disorder or pulmonary infect\* or respiratory disease\* or respiratory disorder or respiratory infect\* or obstructive lung disease\* or obstructive pulmonary disease\* or aspiration pneumoni\* or bronchiectasi

## Appendix 2: Sensitivity analysis A and B

### Sensitivity A- minus Raitauso

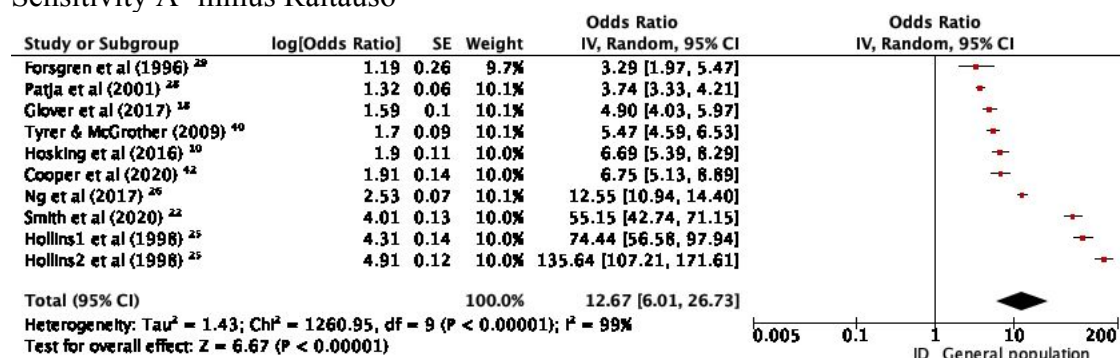

### Sensitivity B- minus Raitauso and Tyrer

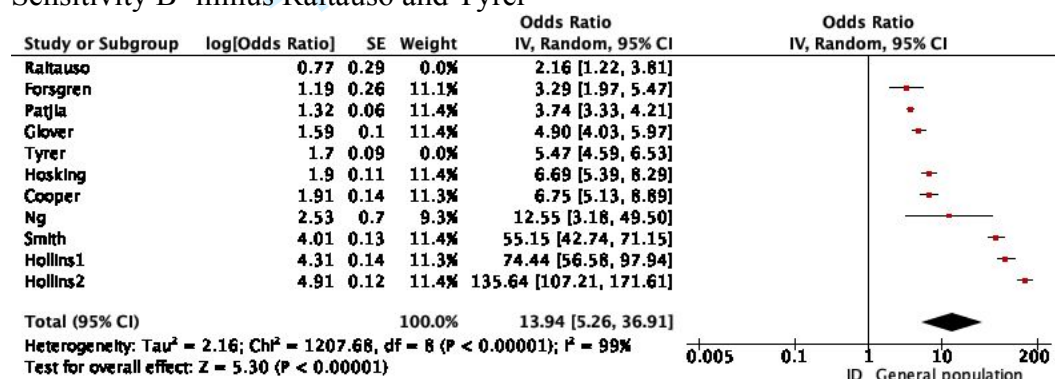

## Appendix 3: Excluded papers – References and reasons for exclusion

|   | Reference                                                                                                                                                                                                                                                     | Reason                                                      |
|---|---------------------------------------------------------------------------------------------------------------------------------------------------------------------------------------------------------------------------------------------------------------|-------------------------------------------------------------|
| 1 | Bilder D, Botts EL, Smith KR, Pimentel R, Farley M, Viskochil J. Excess mortality and causes of death in autism spectrum disorders: A follow up of the 1980s Utah/ UCLA autism epidemiologic study. <i>J Autism Dev Disord</i> 2013; <b>43(5)</b> : 1196-1204 | Did not include individuals with intellectual disabilities. |
| 2 | Decoufle P, Autry A. Increased mortality in children and adolescents with developmental disabilities. <i>Paediatr Perinat Epidemiol</i> 2002; <b>16(4)</b> : 375-382                                                                                          | No general population comparison group.                     |
| 3 | Florio T, Trollor J. Mortality among a cohort of persons with an intellectual disability in New South Wales, Australia. <i>J Appl Res Intellect Disabil</i> 2015; <b>28(5)</b> : 383-393.                                                                     | Respiratory causes of death not included separately.        |
| 4 | Glover G, Ayub M. How people with learning disabilities die. Improving Health and Lives Learning Disabilities Observatory. Durham, 2010.                                                                                                                      | Not peer-reviewed.                                          |

|    |    |                                                                                                                                                                                                                                                           |
|----|----|-----------------------------------------------------------------------------------------------------------------------------------------------------------------------------------------------------------------------------------------------------------|
| 1  |    |                                                                                                                                                                                                                                                           |
| 2  |    |                                                                                                                                                                                                                                                           |
| 3  |    |                                                                                                                                                                                                                                                           |
| 4  |    |                                                                                                                                                                                                                                                           |
| 5  | 5  | Jahan I, Karim T, Das MC, Muhit M, McIntyre S, Smithers-Sheedy H, et al. Mortality in children with cerebral palsy in rural Bangladesh: a population-based surveillance study. <i>Dev Med Child Neurol</i> 2019; <b>61(11)</b> : 1336-1343                |
| 6  | 6  | McCarron M, Carroll R, Kelly C, McCallion P. Mortality rates in the general Irish population compared to those with an intellectual disability from 2003 to 2012. <i>J Appl Res Intellect Disabil</i> 2015; <b>28(5)</b> : 406-413.                       |
| 7  | 7  | Perez CM, Ball SL, Wagner AP, Clare ICH, Holland AJ, Redley M. The incidence of healthcare use, ill health and mortality in adults with intellectual disabilities and mealtime support needs. <i>J Intellect Disabil Res</i> 2015; <b>59(7)</b> : 638-652 |
| 8  | 8  | Reid, SM, Carlin JB, Reddihough DS. Survival of individuals with cerebral palsy born in Victoria, Australia, between 1970 and 2004. <i>Dev Med Child Neurol</i> 2012; <b>54(4)</b> : 353-360                                                              |
| 9  | 9  | Shavelle, Robert M.; Strauss, David J.; Pickett, Jane Causes of death in autism. <i>J Autism Dev Disord</i> 2001; <b>31(6)</b> : 569-576                                                                                                                  |
| 10 | 10 | Similä S, Von Wendt L, Rantakallio P. Mortality of mentally retarded children to 17 years of age assessed in a prospective one-year birth cohort. <i>J Ment Defic Res</i> 1986; <b>30</b> : 401-5                                                         |
| 11 | 11 | Stankiewicz E, Ouellette-Kuntz H, McIsaac M, Shooshtari S, Balogh R. Patterns of mortality among adults with intellectual and developmental disabilities in Ontario. <i>Can J Public Health</i> 2018; <b>109(5-6)</b> : 866-872                           |
| 12 | 12 | Tyrer F, Smith LK, McGrother CW. Mortality in adults with moderate to profound intellectual disability: a population-based study. <i>J Intellect Disabil Res</i> , 2007; <b>51(7)</b> : 520-527.                                                          |
| 13 |    | Did not include individuals with intellectual disabilities.                                                                                                                                                                                               |
| 14 |    | Respiratory causes of death not included separately.                                                                                                                                                                                                      |
| 15 |    | No general population comparison group.                                                                                                                                                                                                                   |
| 16 |    | Did not include individuals with intellectual disabilities.                                                                                                                                                                                               |
| 17 |    | Did not include individuals with intellectual disabilities.                                                                                                                                                                                               |
| 18 |    | Respiratory causes of death not included separately.                                                                                                                                                                                                      |
| 19 |    | <70%* of participants had intellectual disabilities.<br>*We emailed this author to check if >70% of sample had ID – they replied but didn't have the data to check, so it was excluded.                                                                   |
| 20 |    | Respiratory causes of death not included separately.                                                                                                                                                                                                      |

1  
2  
3  
4  
5  
6  
7  
8  
9  
10  
11  
12  
13  
14  
15  
16  
17  
18  
19  
20  
21  
22  
23  
24  
25  
26  
27  
28  
29  
30  
31  
32  
33  
34  
35  
36  
37  
38  
39  
40  
41  
42  
43  
44  
45  
46  
47  
48  
49  
50  
51  
52  
53  
54  
55  
56  
57  
58  
59  
60

For peer review only

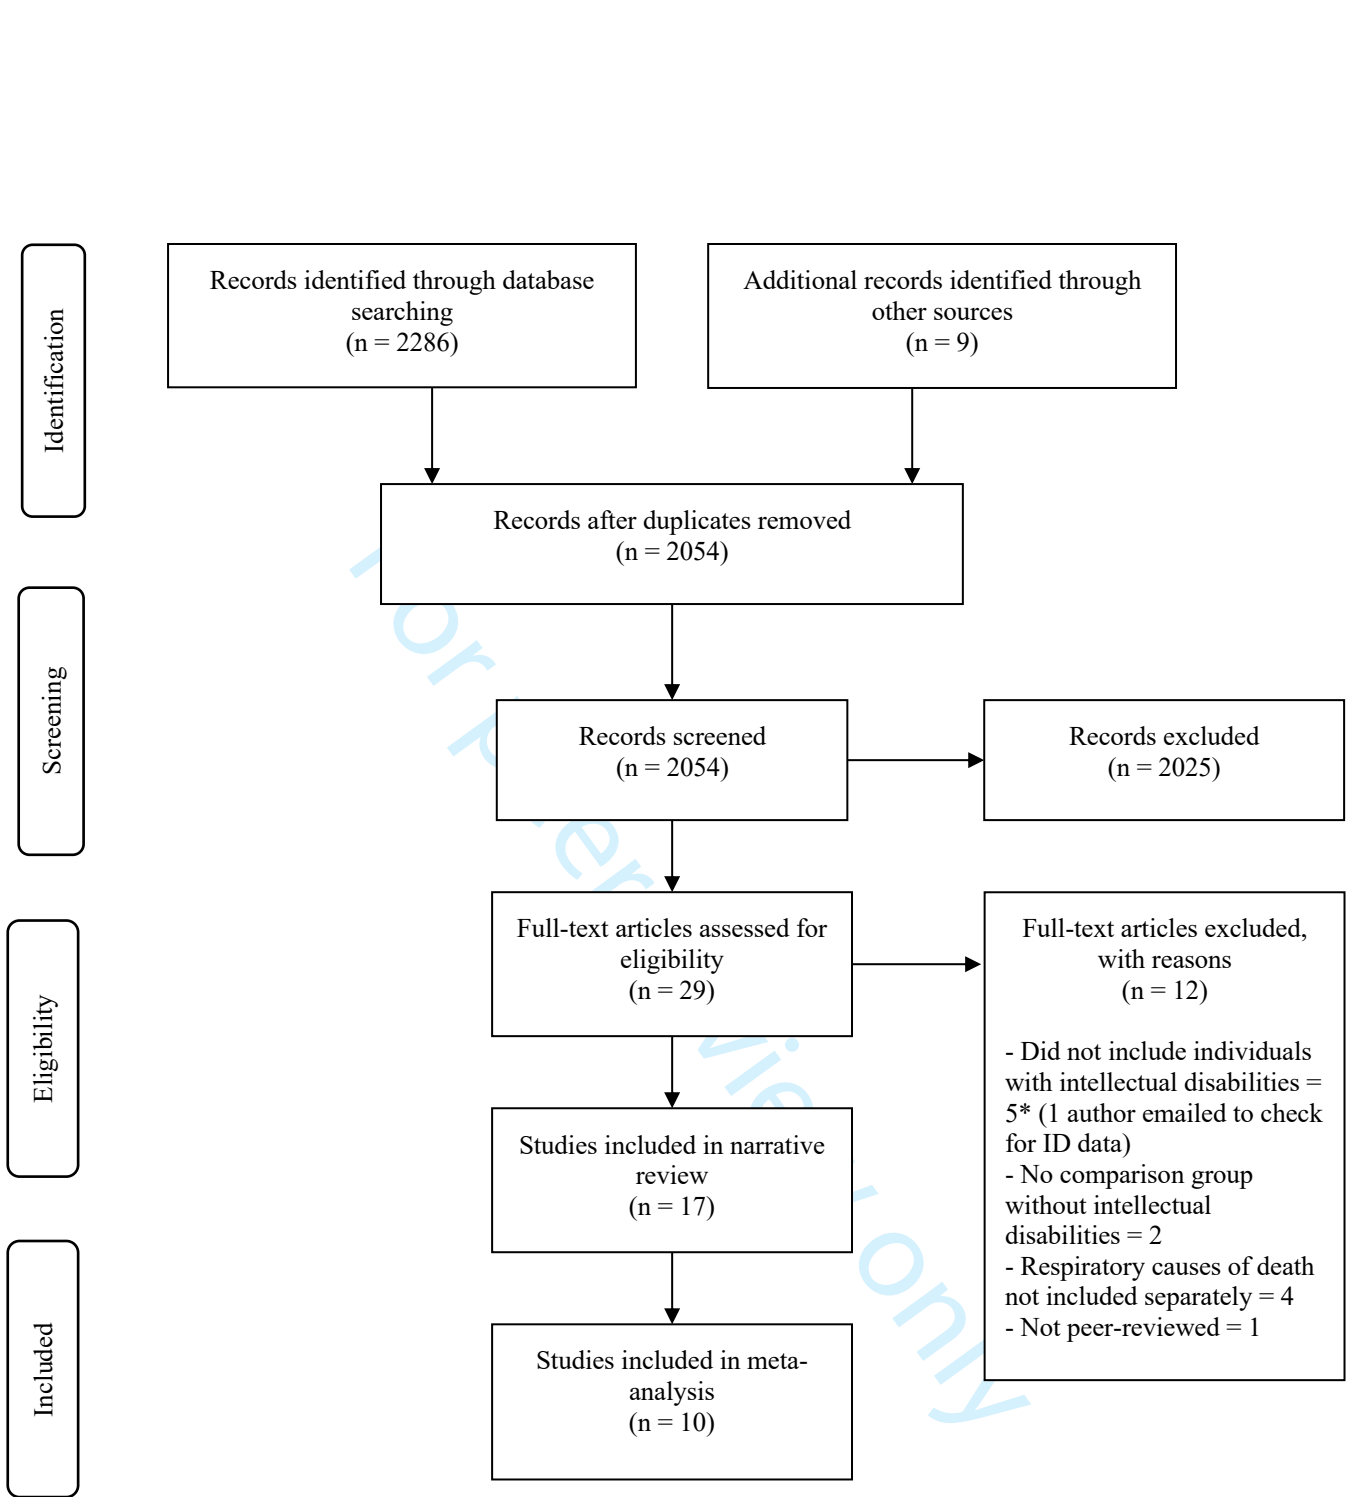



1  
2  
3  
4  
5  
6  
7  
8  
9  
10  
11  
12  
13  
14  
15  
16  
17  
18  
19  
20  
21  
22  
23  
24  
25  
26  
27  
28  
29  
30  
31  
32  
33  
34  
35  
36  
37  
38  
39  
40  
41  
42  
43  
44  
45  
46  
47  
48  
49  
50  
51  
52  
53  
54  
55  
56  
57  
58  
59  
60

For

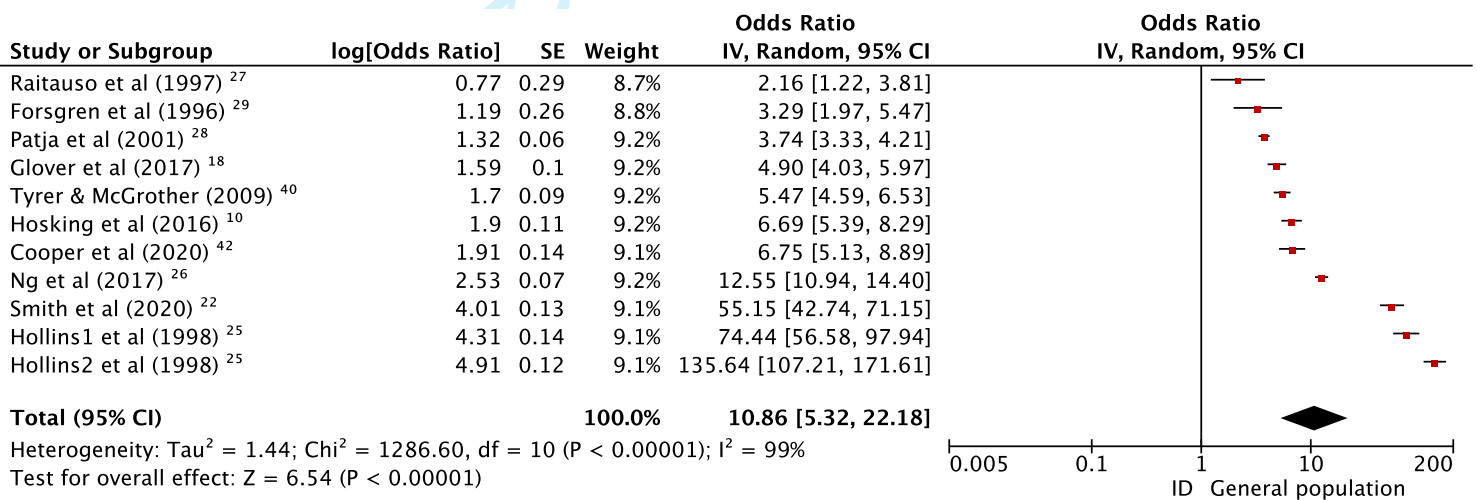

only

1  
2  
3  
4  
5  
6  
7  
8  
9  
10  
11  
12  
13  
14  
15  
16  
17  
18  
19  
20  
21  
22  
23  
24  
25  
26  
27  
28  
29  
30  
31  
32  
33  
34  
35  
36  
37  
38  
39  
40  
41  
42  
43  
44  
45  
46  
47  
48  
49  
50  
51  
52  
53  
54  
55  
56  
57  
58  
59  
60

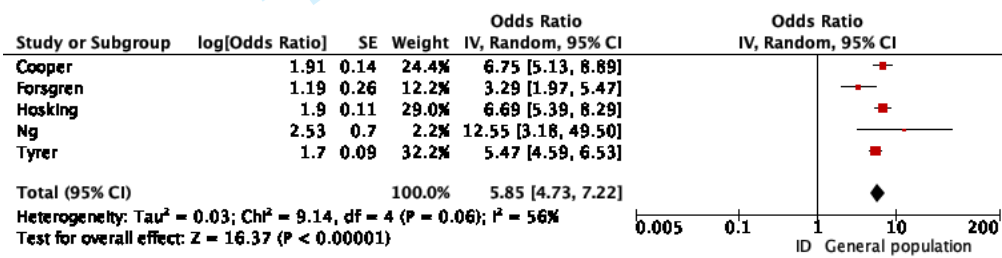

1  
2  
3  
4  
5  
6  
7  
8  
9  
10  
11  
12  
13  
14  
15  
16  
17  
18  
19  
20  
21  
22  
23  
24  
25  
26  
27  
28  
29  
30  
31  
32  
33  
34  
35  
36  
37  
38  
39  
40  
41  
42  
43  
44  
45  
46  
47  
48  
49  
50  
51  
52  
53  
54  
55  
56  
57  
58  
59  
60

For peer review only

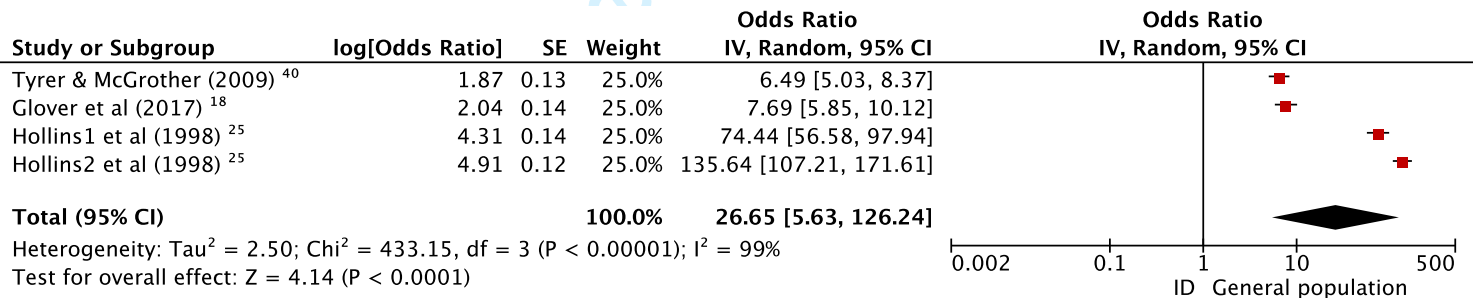

**PRISMA-A checklist**

| <b>Subjects</b>                  | <b>PRISMA for Acupuncture</b>                                                                                                                                                                                                                                                                                                                                                                                                                                                                                                                                        |
|----------------------------------|----------------------------------------------------------------------------------------------------------------------------------------------------------------------------------------------------------------------------------------------------------------------------------------------------------------------------------------------------------------------------------------------------------------------------------------------------------------------------------------------------------------------------------------------------------------------|
| <b>Title</b>                     |                                                                                                                                                                                                                                                                                                                                                                                                                                                                                                                                                                      |
| <b>Title</b>                     | 1* Identify the report as a systematic review, meta-analysis, or both; if applicable, state the specific type of acupuncture treatment, such as manual acupuncture or electroacupuncture.                                                                                                                                                                                                                                                                                                                                                                            |
| <b>Abstract</b>                  |                                                                                                                                                                                                                                                                                                                                                                                                                                                                                                                                                                      |
| <b>Structured summary</b>        | 2† Provide a structured summary including, as applicable: background; objectives; data sources; study eligibility criteria, participants, and interventions; study appraisal and synthesis methods; results limitations; conclusions and implications of key findings; systematic review registration number.                                                                                                                                                                                                                                                        |
| <b>Introduction</b>              |                                                                                                                                                                                                                                                                                                                                                                                                                                                                                                                                                                      |
| <b>Rationale</b>                 | 3* Describe the rationale for what is already known about acupuncture for the target condition in the background; if applicable, state what is already known about the specific types of acupuncture to be studied, and describe whether there is any difference of the effects among different types of acupuncture.                                                                                                                                                                                                                                                |
| <b>Objectives</b>                | 4† Provide an explicit statement of questions being addressed with reference to participants, interventions, comparisons, outcomes, and study design (PICOS)                                                                                                                                                                                                                                                                                                                                                                                                         |
| <b>Methods</b>                   |                                                                                                                                                                                                                                                                                                                                                                                                                                                                                                                                                                      |
| <b>Protocol and registration</b> | 5† Indicate if a review protocol exists, if and where it can be accessed (e.g., web address), and, if available, provide registration information including registration number.                                                                                                                                                                                                                                                                                                                                                                                     |
| <b>Eligibility criteria</b>      | 6† Specify study characteristics (e.g., PICOS, length of follow-up) and report characteristics (e.g., years considered, language, publication status) used as criteria for eligibility, giving rationale.<br>6a.1‡ Describe the diagnostic criteria of the target condition in Western medicine.<br>6a.2‡ If applicable, describe the diagnostic criteria in terms of Traditional Medicine, such as Traditional Chinese Medicine.<br>6b‡ Describe the types of acupuncture to be included, such as traditional acupuncture, electroacupuncture, or fire acupuncture. |

|    |                             |                                                                                                                                                                     |
|----|-----------------------------|---------------------------------------------------------------------------------------------------------------------------------------------------------------------|
| 1  |                             |                                                                                                                                                                     |
| 2  |                             |                                                                                                                                                                     |
| 3  |                             |                                                                                                                                                                     |
| 4  |                             |                                                                                                                                                                     |
| 5  |                             | 6c <sup>‡</sup> If applicable, report measures for therapeutic effects using the terminology of either traditional medicine (e.g. syndrome score for                |
| 6  |                             | syndrome remission) or Western medicine (e.g. pain intensity).                                                                                                      |
| 7  |                             |                                                                                                                                                                     |
| 8  |                             | 7* Describe all sources of information (e.g., databases with dates of coverage, contact with study authors to identify additional studies) in                       |
| 9  | <b>Information sources</b>  | the search, and report the date of the last search. If applicable, report the databases or complementary search methods for acupuncture or                          |
| 10 |                             | traditional medicine.                                                                                                                                               |
| 11 |                             |                                                                                                                                                                     |
| 12 |                             | 8* Present full electronic search strategy for at least one commonly used database (e.g. MEDLINE), including any limits used, such that it                          |
| 13 | <b>Search</b>               | could be repeated. If applicable, include the full search strategy for at least a Western and a traditional medicine database for each                              |
| 14 |                             | systematic review where both were used.                                                                                                                             |
| 15 |                             |                                                                                                                                                                     |
| 16 |                             | 9 <sup>†</sup> State the process for selecting studies (i.e., screening, eligibility, included in systematic review, and, if applicable, included in the meta-      |
| 17 | <b>Study selection</b>      | analysis).                                                                                                                                                          |
| 18 |                             |                                                                                                                                                                     |
| 19 | <b>Data collection</b>      | 10 <sup>†</sup> Describe method of data extraction from reports (e.g., piloted forms, independently, in duplicate) and any processes for obtaining and              |
| 20 | <b>process</b>              | confirming data from investigators.                                                                                                                                 |
| 21 |                             |                                                                                                                                                                     |
| 22 | <b>Data items</b>           | 11* List and define all variables for which data were sought (e.g., PICOS, funding sources) and any assumptions and simplifications made;                           |
| 23 |                             | describe data items about details of acupuncture interventions and controls (e.g., sham acupuncture) referring to TIDieR when applicable.                           |
| 24 |                             |                                                                                                                                                                     |
| 25 | <b>Risk of bias in</b>      | 12 <sup>†</sup> Describe methods used for assessing risk of bias of individual studies (including specification of whether this was done at the study or            |
| 26 | <b>individual studies</b>   | outcome level), and how this information is to be used in any data synthesis.                                                                                       |
| 27 |                             |                                                                                                                                                                     |
| 28 | <b>Summary measures</b>     | 13 <sup>†</sup> State the principal summary measures (e.g., risk ratio, difference in means).                                                                       |
| 29 |                             |                                                                                                                                                                     |
| 30 | <b>Synthesis of results</b> | 14 <sup>†</sup> Describe the methods of handling data and combining results of studies, if done, including measures of consistency (e.g., I <sup>2</sup> ) for each |
| 31 |                             | meta-analysis.                                                                                                                                                      |
| 32 | <b>Risk of bias across</b>  | 15 <sup>†</sup> Specify any assessment of risk of bias that may affect the cumulative evidence (e.g., publication bias, selective reporting within                  |
| 33 | <b>studies</b>              | studies).                                                                                                                                                           |
| 34 |                             |                                                                                                                                                                     |
| 35 | <b>Additional analyses</b>  | 16 <sup>†</sup> Describe methods of additional analyses (e.g., sensitivity or subgroup analyses, meta-regression), if done, indicating which were pre-              |
| 36 |                             | specified.                                                                                                                                                          |

## Results

|                                                                                                                                                                                                                                                                         |                                                                                                                                                                                                                                                                                                                                                                                                                                                                                                                                                                                                                                                                                                                                                                                                                                                                                                                                                                                                                                                                                                                                                                                                                                                                                                                                                                                                                                                                                                                                                                                                                                                                                                                                                                                                                                                                                                                                                                                                                                                                                                                                                                                                                                                                                                                                                                                           |
|-------------------------------------------------------------------------------------------------------------------------------------------------------------------------------------------------------------------------------------------------------------------------|-------------------------------------------------------------------------------------------------------------------------------------------------------------------------------------------------------------------------------------------------------------------------------------------------------------------------------------------------------------------------------------------------------------------------------------------------------------------------------------------------------------------------------------------------------------------------------------------------------------------------------------------------------------------------------------------------------------------------------------------------------------------------------------------------------------------------------------------------------------------------------------------------------------------------------------------------------------------------------------------------------------------------------------------------------------------------------------------------------------------------------------------------------------------------------------------------------------------------------------------------------------------------------------------------------------------------------------------------------------------------------------------------------------------------------------------------------------------------------------------------------------------------------------------------------------------------------------------------------------------------------------------------------------------------------------------------------------------------------------------------------------------------------------------------------------------------------------------------------------------------------------------------------------------------------------------------------------------------------------------------------------------------------------------------------------------------------------------------------------------------------------------------------------------------------------------------------------------------------------------------------------------------------------------------------------------------------------------------------------------------------------------|
| 1<br>2<br>3<br>4<br>5<br>6<br>7<br>8<br>9<br>10<br>11<br>12<br>13<br>14<br>15<br>16<br>17<br>18<br>19<br>20<br>21<br>22<br>23<br>24<br>25<br>26<br>27<br>28<br>29<br>30<br>31<br>32<br>33<br>34<br>35<br>36<br>37<br>38<br>39<br>40<br>41<br>42<br>43<br>44<br>45<br>46 | <p><b>Study selection</b> 17<sup>†</sup> Give numbers of studies screened, assessed for eligibility, and included in the review, with reasons for exclusions at each stage, ideally with a flow diagram.</p> <p><b>Study characteristics</b> 18* For each study, present characteristics that were extracted (e.g., study size, PICOS, follow-up period) and provide the citations of the included studies. Summarize details of the acupuncture intervention for each study in a table referring to TIDieR.</p> <p>18a<sup>‡</sup> Describe details of “De-qi” after acupuncture reported in the included studies.</p> <p><b>Risk of bias within studies</b> 19<sup>†</sup> Present data on risk of bias of each study and, if available, any outcome-level assessment(see item 12).</p> <p><b>Results of individual studies</b> 20<sup>†</sup> For all outcomes considered (benefits or harms), present, for each study: (a) simple summary data for each intervention group and (b) effect estimates and confidence intervals, ideally with a forest plot.</p> <p><b>Synthesis of results</b> 21<sup>†</sup> Present results of each meta-analysis done, including confidence intervals and measures of consistency.</p> <p><b>Risk of bias across studies</b> 22<sup>†</sup> Present results of any assessment of risk of bias across studies (see item 15).</p> <p><b>Additional analysis</b> 23<sup>†</sup> Give results of additional analyses, if done (e.g., sensitivity or subgroup analyses, meta-regression [see item 16]).</p> <p><b>Discussion</b></p> <p><b>Summary of evidence</b> 24<sup>†</sup> Summarize the main findings including the strength of evidence for each main outcome; consider their relevance to key groups (e.g., health care providers, users, and policy makers).</p> <p><b>Limitations</b> 25<sup>†</sup> Discuss limitations at study and outcome level (e.g., risk of bias), and at review level (e.g., incomplete retrieval of identified research, reporting bias).</p> <p><b>Conclusions</b> 26<sup>†</sup> Provide a general interpretation of the results in the context of other evidence, and implications for future research.</p> <p><b>Funding</b></p> <p><b>Funding</b> 27<sup>†</sup> Describe sources of funding for the systematic review and other support (e.g., supply of data); role of funders for the systematic review.</p> |
|-------------------------------------------------------------------------------------------------------------------------------------------------------------------------------------------------------------------------------------------------------------------------|-------------------------------------------------------------------------------------------------------------------------------------------------------------------------------------------------------------------------------------------------------------------------------------------------------------------------------------------------------------------------------------------------------------------------------------------------------------------------------------------------------------------------------------------------------------------------------------------------------------------------------------------------------------------------------------------------------------------------------------------------------------------------------------------------------------------------------------------------------------------------------------------------------------------------------------------------------------------------------------------------------------------------------------------------------------------------------------------------------------------------------------------------------------------------------------------------------------------------------------------------------------------------------------------------------------------------------------------------------------------------------------------------------------------------------------------------------------------------------------------------------------------------------------------------------------------------------------------------------------------------------------------------------------------------------------------------------------------------------------------------------------------------------------------------------------------------------------------------------------------------------------------------------------------------------------------------------------------------------------------------------------------------------------------------------------------------------------------------------------------------------------------------------------------------------------------------------------------------------------------------------------------------------------------------------------------------------------------------------------------------------------------|

Note: \* modified original item    <sup>†</sup> unmodified item from PRISMA    <sup>‡</sup> new extended item

# BMJ Open

## Respiratory-associated deaths in people with intellectual disabilities: a systematic review and meta-analysis

|                                 |                                                                                                                                                                                                                                                                                                                                                                                                                                                                                                                                                                                                                                                                                                                                                                                                                                                                                                                                                                                                                                                                                                                                                                                                                                     |
|---------------------------------|-------------------------------------------------------------------------------------------------------------------------------------------------------------------------------------------------------------------------------------------------------------------------------------------------------------------------------------------------------------------------------------------------------------------------------------------------------------------------------------------------------------------------------------------------------------------------------------------------------------------------------------------------------------------------------------------------------------------------------------------------------------------------------------------------------------------------------------------------------------------------------------------------------------------------------------------------------------------------------------------------------------------------------------------------------------------------------------------------------------------------------------------------------------------------------------------------------------------------------------|
| Journal:                        | <i>BMJ Open</i>                                                                                                                                                                                                                                                                                                                                                                                                                                                                                                                                                                                                                                                                                                                                                                                                                                                                                                                                                                                                                                                                                                                                                                                                                     |
| Manuscript ID                   | bmjopen-2020-043658.R1                                                                                                                                                                                                                                                                                                                                                                                                                                                                                                                                                                                                                                                                                                                                                                                                                                                                                                                                                                                                                                                                                                                                                                                                              |
| Article Type:                   | Original research                                                                                                                                                                                                                                                                                                                                                                                                                                                                                                                                                                                                                                                                                                                                                                                                                                                                                                                                                                                                                                                                                                                                                                                                                   |
| Date Submitted by the Author:   | 08-Feb-2021                                                                                                                                                                                                                                                                                                                                                                                                                                                                                                                                                                                                                                                                                                                                                                                                                                                                                                                                                                                                                                                                                                                                                                                                                         |
| Complete List of Authors:       | <p>Truesdale, Maria; University of Glasgow College of Medical Veterinary and Life Sciences, Mental Health and Wellbeing<br/> Melville, Craig; University of Glasgow, Institute of Health and Wellbeing<br/> Barlow, Fiona; University of Glasgow College of Medical Veterinary and Life Sciences, Mental Health and Wellbeing<br/> Dunn, Kirsty; University of Glasgow College of Medical Veterinary and Life Sciences, Mental Health and Wellbeing<br/> Henderson, Angela; University of Glasgow, Institute of Health and Wellbeing<br/> Hughes-McCormack, Laura; University of Glasgow, Institute of Health and Wellbeing<br/> McGarty, Arlene; University of Glasgow College of Medical Veterinary and Life Sciences, Mental Health and Wellbeing<br/> Rydzewska, Ewelina; University of Glasgow<br/> Smith, Gillian; University of Glasgow College of Medical Veterinary and Life Sciences, Mental Health and Wellbeing<br/> Symonds, Joseph; University of Glasgow College of Medical Veterinary and Life Sciences, Mental Health and Wellbeing<br/> Jani, Bhautesh; University of Glasgow College of Medical Veterinary and Life Sciences<br/> Kinnear, Deborah; University of Glasgow, Institute of Health and Wellbeing</p> |
| <b>Primary Subject Heading</b>: | Respiratory medicine                                                                                                                                                                                                                                                                                                                                                                                                                                                                                                                                                                                                                                                                                                                                                                                                                                                                                                                                                                                                                                                                                                                                                                                                                |
| Secondary Subject Heading:      | Respiratory medicine                                                                                                                                                                                                                                                                                                                                                                                                                                                                                                                                                                                                                                                                                                                                                                                                                                                                                                                                                                                                                                                                                                                                                                                                                |
| Keywords:                       | RESPIRATORY MEDICINE (see Thoracic Medicine), PUBLIC HEALTH, Respiratory infections < THORACIC MEDICINE                                                                                                                                                                                                                                                                                                                                                                                                                                                                                                                                                                                                                                                                                                                                                                                                                                                                                                                                                                                                                                                                                                                             |
|                                 |                                                                                                                                                                                                                                                                                                                                                                                                                                                                                                                                                                                                                                                                                                                                                                                                                                                                                                                                                                                                                                                                                                                                                                                                                                     |

SCHOLARONE™  
Manuscripts



I, the Submitting Author has the right to grant and does grant on behalf of all authors of the Work (as defined in the below author licence), an exclusive licence and/or a non-exclusive licence for contributions from authors who are: i) UK Crown employees; ii) where BMJ has agreed a CC-BY licence shall apply, and/or iii) in accordance with the terms applicable for US Federal Government officers or employees acting as part of their official duties; on a worldwide, perpetual, irrevocable, royalty-free basis to BMJ Publishing Group Ltd ("BMJ") its licensees and where the relevant Journal is co-owned by BMJ to the co-owners of the Journal, to publish the Work in this journal and any other BMJ products and to exploit all rights, as set out in our [licence](#).

The Submitting Author accepts and understands that any supply made under these terms is made by BMJ to the Submitting Author unless you are acting as an employee on behalf of your employer or a postgraduate student of an affiliated institution which is paying any applicable article publishing charge ("APC") for Open Access articles. Where the Submitting Author wishes to make the Work available on an Open Access basis (and intends to pay the relevant APC), the terms of reuse of such Open Access shall be governed by a Creative Commons licence – details of these licences and which [Creative Commons](#) licence will apply to this Work are set out in our licence referred to above.

Other than as permitted in any relevant BMJ Author's Self Archiving Policies, I confirm this Work has not been accepted for publication elsewhere, is not being considered for publication elsewhere and does not duplicate material already published. I confirm all authors consent to publication of this Work and authorise the granting of this licence.



Title: "Respiratory-associated deaths in people with intellectual disabilities: a systematic review and meta-analysis"

## Authors

Maria Truesdale<sup>1</sup> (Senior lecturer of Intellectual Disabilities)  
Craig Melville<sup>1</sup> (Professor of Intellectual Disabilities Psychiatry)  
Fiona Barlow<sup>1</sup> (Impact and Communications Officer, Scottish Learning Disabilities Observatory)  
Kirsty Dunn<sup>1</sup> (Postdoctoral Research Associate)  
Angela Henderson<sup>1</sup> (Director of Policy and Impact, Scottish Learning Disabilities Observatory)  
Laura Hughes-McCormack<sup>1</sup> (Research Associate)  
Arlene McGarty<sup>1</sup> (Postdoctoral Research Associate)  
Ewelina Rydzewska<sup>1</sup>(Postdoctoral Research Associate)  
Gillian Smith<sup>1</sup> (Research Assistant)  
Joseph Symonds<sup>1</sup> (Honorary Clinical Lecturer)  
Bhautesh Jani<sup>1</sup> (Clinical Senior Lecturer/Honorary Consultant)  
Deborah Kinnear<sup>1</sup> (Senior lecturer of Intellectual Disabilities)

## Affiliations

<sup>1</sup> University of Glasgow, Institute of Health and Well-being, Glasgow, UK

## Address for correspondence

Dr Maria Truesdale  
Senior lecturer in Intellectual Disabilities  
College of Medical Veterinary and Life Sciences  
University of Glasgow  
Institute of Health and Well-being  
Mental Health and Well-being  
2<sup>nd</sup> floor Administration Building  
Gartnavel Royal Hospital  
1055 Great Western Road  
Glasgow  
G12 0 XH

Email: [maria.truesdale@glasgow.ac.uk](mailto:maria.truesdale@glasgow.ac.uk)

Tel: +44(0) 141 232 3926

Fax:+44 (0) 141 211 0356

Keywords: Respiratory disease, mortality, intellectual disability, systematic review, meta-analysis

Wordcount: 3850

## ABSTRACT

**Objective** To review and synthesise evidence on rates of respiratory-associated deaths and associated risk factors in the intellectual disability population.

**Design** Systematic review with meta-analysis

**Data sources** Embase, CINAHL, ISI Web of Science (all databases including Medline), and PsychINFO were searched for studies published between January 1985 to April 2020 and examined study and outcome quality. Reference lists and Google Scholar were also hand searched.

**Results** We identified 2,063 studies, 17 were included in the narrative synthesis and 10 studies (11 cohorts) in the meta-analysis. Data from 90,302 people with ID and 13,808 deaths from all causes in people with ID were extracted. Significantly higher rates of respiratory-associated deaths were found among people with ID (SMR 10·86 (95% CI 5·32, 22·18,  $p < 0·001$ ) compared to those in the general population, lesser rates for adults with intellectual disabilities (SMR 6·53 (95% CI 4·29, 9·96,  $p < 0·001$ ); and relatively high rates from pneumonia 26·65 (95% CI 5·63, 126·24,  $p < 0·001$ ). The overall statistical heterogeneity was  $I^2 = 99·0\%$ .

**Conclusion** Premature deaths due to respiratory disorders are potentially avoidable with improved public health initiatives and equitable access to quality health care. Further research should focus on developing prognostic guidance and validated tools for clinical practice to mitigate risks of respiratory-associated deaths.

**PROSPERO registration number** CRD42020180479

### Article summary

#### Strengths and limitations of this study

- To our knowledge this is the first systematic review and meta-analysis on respiratory-associated deaths among people with intellectual disabilities.
- Included studies were limited by sample size
- There was no sufficient data and results provided by studies to investigate predictors or factors associated with respiratory-related deaths; meta-regression or stratification was not possible
- The meta-analysis included mortality ratios from ten observational studies covering 90,302 people with intellectual disabilities and 13,808 deaths from all causes in people with intellectual disabilities.

- A rigorous and systematic analysis process was undertaken which minimised the risk of bias, errors and omissions.

## Introduction

People with intellectual disabilities account for approximately 1-3% of the global population.[1,2] The World Health Organisation (1992)[3] defines intellectual disabilities as impairments in adaptive functioning, social functioning, and intellectual functioning, (IQ<70) requiring a need for daily support, with the onset in the developmental phase (<18 years). Whilst some heterogeneity is to be expected in the definition of intellectual disabilities across studies drawing on administrative datasets, the WHO definition can be applied to all studies included in this review. Life expectancy and mortality rates are important indicators of health inequality.[4] People with intellectual disabilities die up to 20 years earlier than the general population.[5-8] Respiratory disorders are a leading cause of death among people with intellectual disabilities.[6,9] The range of standardised mortality ratios (SMRs) due to respiratory disorders for people with intellectual disabilities are very high in some studies,[10-12] and much lower in others.[13-15]. Despite this, standardised mortality ratios (SMRs) due to respiratory disorders for people with intellectual disabilities differ widely across studies. While SMRs are very high in some studies [10-12], the populations with intellectual disabilities are younger (4-19 years) or older (55+ years) on average, or the age of the population is not available/reported. Moreover, in studies with very low SMRs [13-15], age (or level of intellectual disabilities) is not reported. This systematic review and meta-analysis aims to investigate and quantify the risk of, and factors associated with, respiratory-associated deaths in people with intellectual disabilities.

## Methods

The Preferred Reporting Items for Systematic Reviews and Meta-Analyses (PRISMA) checklist was followed.[16] This review was prospectively registered with the International Prospective Register of Systematic Reviews (PROSPERO, registration number: CRD42020180479).

## Eligibility

This systematic review included studies which analysed and presented data on people who were ascertained as having intellectual disabilities and a comparison group of individuals in the general population, with respiratory disorders included as a separate cause of death. For studies

1  
2 that included multiple disabilities, at least 70% of participants had to have intellectual  
3 disabilities, if results were not reported separately. Studies also had to be full-text, peer-  
4 reviewed, and published in English. To be included in the meta-analysis, studies had to report  
5 SMRs with 95% confidence intervals for respiratory associated deaths based on external  
6 comparison group or to have presented data allowing such outcomes to be derived. Studies were  
7 excluded if they focused on specific etiologies of intellectual disabilities, such as Down  
8 syndrome, as these are associated with a different health and mortality profiles compared to  
9 other people with intellectual disabilities. Studies were excluded if the full paper was not  
10 available in English. Studies focused on post-operative and post-treatment deaths were  
11 excluded as these are not representative of the wider population with intellectual disabilities.  
12 Studies with small samples (<20 participants) or case series designs were also excluded as these  
13 papers are less representative.  
14  
15  
16  
17  
18  
19  
20  
21  
22  
23  
24

### 25 **Search strategy and selection criteria**

26 We searched Ovid Embase, ISI Web of Science (all databases), CINAHL, and PsycINFO from  
27 1<sup>st</sup> January 1985 to the 27<sup>th</sup> of April 2020, using comprehensive terms related to ‘intellectual  
28 disabilities’, ‘mortality’, and ‘respiratory disease’ (full search strategy in Appendix 1). In  
29 addition, a manual bibliography and citation search of included studies was conducted using  
30 Google Scholar and key researchers in the field of mortality in individuals with intellectual  
31 disabilities were emailed to identify any additional relevant papers. The aforementioned  
32 eligibility criteria were used. After duplicates were removed, all records were imported into  
33 Covidence software ([www.covidence.org](http://www.covidence.org)) for title and abstract and full text screening. All  
34 titles, abstracts (CM & AMcG) and full-texts (CM, AMcG, ER) were double-screened with  
35 inter-rater reliability (Cohen’s kappa) of  $\kappa = .57$  and  $\kappa = .58$ , respectively.  
36  
37  
38  
39  
40  
41  
42  
43  
44  
45

### 46 **Data Extraction**

47 Data extraction was conducted using a structured database created in Excel. Five researchers  
48 (GS, LHM, DK, KD, AMcG) each extracted data from 25% of the included studies and, to  
49 check reliability, one other researcher (CM) independently extracted data from 20% of included  
50 studies. Extracted data were compared in meetings and discrepancies resolved through  
51 consensus discussion. Researchers did not extract data on included papers where they were a  
52 listed author.  
53  
54  
55  
56  
57  
58  
59  
60

### 61 **Assessment of study and outcome quality**

1  
2  
3  
4  
5  
6  
7  
8  
9  
10  
11  
12  
13  
14  
15  
16  
17  
18  
19  
20  
21  
22  
23  
24  
25  
26  
27  
28  
29  
30  
31  
32  
33  
34  
35  
36  
37  
38  
39  
40  
41  
42  
43  
44  
45  
46  
47  
48  
49  
50  
51  
52  
53  
54  
55  
56  
57  
58  
59  
60

Study quality was appraised using the Standard Quality Assessment Criteria for Evaluating Primary Research Papers from a Variety of Fields.[17] Quality ratings were calculated in percentage form using the standard method[17] and categorised as weak (<55%), moderate (55-75%), or strong (>75%) quality. Each paper had quality appraisals completed by two researchers, who then agreed a consensus score for each item (Table 1).[17] Researchers did not evaluate quality of papers where they were a listed author. Risk of bias score was not used to exclude any studies from either the systematic review or meta-analysis. We evaluated the quality of our own systematic review using the Measurement Tool to Assess Systematic Reviews (AMSTAR) checklist.[18]

**Table 1: Characteristics of studies reporting mortality rates for respiratory disorders and pneumonia in people with intellectual disabilities**

| Author                               | Country   | Study design, setting and follow up                                                     | Data sources                                                                                                       | ID sample (N, % female, age, level of ID)                                                                                                     | Deaths in ID sample (N, % female, age at time of death, level of ID)           | Comparison sample (N, % female, age,) and deaths (n, % female, age)                                          | Respiratory disorder definition (e.g. ICD codes or other definitions) | Quality Percentage (assessment) |
|--------------------------------------|-----------|-----------------------------------------------------------------------------------------|--------------------------------------------------------------------------------------------------------------------|-----------------------------------------------------------------------------------------------------------------------------------------------|--------------------------------------------------------------------------------|--------------------------------------------------------------------------------------------------------------|-----------------------------------------------------------------------|---------------------------------|
| Brameld et al (2018) <sup>26</sup>   | Australia | Retrospective matched cohort study of adults 20 years old and over. Follow up 2009-2013 | Intellectual Disability Exploring Answers (IDEA) Database. Death certificate data                                  | Total sample characteristics not available                                                                                                    | N= 591; 43·8% female; mean age* and level of ID not available                  | Total sample characteristics not available. Number of deaths= 62, 917; 47·4% female; mean age not available  | ICD 10-chapter codes for respiratory disorders.                       | 95·45% (strong)                 |
| Cooper et al (2020) <sup>28</sup>    | UK        | Population-based cohort study. Follow up 2001-2018                                      | Primary care records and health check data; Death certificate data. Comparison data from Health Board statistics   | N= 962; 45·4% female; mean age= 44·1 years (range 16-83); ID Mild=382 (39·7%), Moderate=236 (24·5%), Severe=180 (18·7%), Profound=163 (17·0%) | N= 294/961 (30·6%); 47·5% female; mean age= 52·4 (SD 13·6)                     | Not available                                                                                                | ICD 10-chapter codes for respiratory disorders.                       | 86·36% (strong)                 |
| Dupont et al. (1987) <sup>40</sup>   | Denmark   | Population- based cohort study of adults with mild ID. Follow up 1976-1984              | Danish National Service for the Mentally Retarded. Death certificate data.                                         | N = 7134; gender, age and level of ID not available                                                                                           | N=446; 37·9% females; age and level of ID not available                        | Not available                                                                                                | Not described                                                         | 40·90% (weak)                   |
| Durvasula et al (2002) <sup>37</sup> | Australia | Population-based cohort study of children and adults. Follow up 1989 - 1999             | ID prevalence study. Death certificate data, medical records and post-mortem data. Australian Bureau of Statistics | N = 693; 44·6% female; mean age= N/A; ID 40% mild, 35% moderate, 25% severe/profound                                                          | N=40 (6%); 45% female; median age= 32 (range 10-59); level of ID not available | N= 125,848; 51% female; mean age not available. Number of deaths= 2154; 37·8% female; mean age not available | Not described                                                         | 90·91% (strong)                 |
| Forsgren et al (1996) <sup>15</sup>  | Sweden    | Population-based cohort study of adults with ID.                                        | Board for Provision and Services to the Mentally                                                                   | N = 1,478; 44·5% female; age and level of ID not available                                                                                    | N= 247; 42·1% female; Median age= 64 years (IQR 52-75 years); ID 39·7% Mild,   | Not available                                                                                                | ICD 9-chapter codes for respiratory disorders.                        | 81·82% (strong)                 |

1  
2  
3  
4  
5  
6  
7  
8  
9  
10  
11  
12  
13  
14  
15  
16  
17  
18  
19  
20  
21  
22  
23  
24  
25  
26  
27  
28  
29  
30  
31  
32  
33  
34  
35  
36  
37  
38  
39  
40  
41  
42  
43  
44  
45  
46

|                                    |        |                                                                                                                                |                                                                                                              |                                                                                            |                                                                                                                         |                                                                                                                        |                                                 |                 |
|------------------------------------|--------|--------------------------------------------------------------------------------------------------------------------------------|--------------------------------------------------------------------------------------------------------------|--------------------------------------------------------------------------------------------|-------------------------------------------------------------------------------------------------------------------------|------------------------------------------------------------------------------------------------------------------------|-------------------------------------------------|-----------------|
|                                    |        | Follow up 1986 – 1992                                                                                                          | Retarded. Death certificate data from Swedish National Bureau of Statistics                                  |                                                                                            | 31·2%, Moderate, 21·5% Severe 7·7% Profound                                                                             |                                                                                                                        |                                                 |                 |
| Glover et al (2017) <sup>8</sup>   | UK     | Population-based case control study in primary care. Follow up 2010-2014                                                       | Primary care records (CPRD). Death certificate data                                                          | Total sample characteristics not available                                                 | N = 664 deaths; 44·1% female                                                                                            | Total sample characteristics not available. N of deaths= 97, 379; 52·3% female; mean age not available                 | ICD 10-chapter codes for respiratory disorders. | 81·82% (strong) |
| Heslop et al (2014) <sup>5</sup>   | UK     | Population based audit of deaths of children and adults with intellectual disabilities aged 4 and over. Audit period 2010-2012 | Medical records Death certificate data from UK Office of National Statistics                                 | Total sample characteristics not available                                                 | N=247; 42·1% female; median age= 64 years (IQR 52-75 years); ID 39·7% mild, 31·2% moderate, 21·5% severe, 7·7% profound | Total sample characteristics not available. Number of deaths= 480, 467; 51·6% female; median age not available         |                                                 | 81·82% (strong) |
| Hollins et al (1998) <sup>11</sup> | UK     | Cohort study of adults on an ID register. Follow up 1982-1990                                                                  | Learning disability register. Death certificate data.                                                        | N = 2,026; gender, age and ID level not available                                          | N= 268 deaths; gender and age not available; 51·5% mild-moderate, 48·5% severe-profound                                 | Not available                                                                                                          | Not described                                   | 81·82% (strong) |
| Hosking et al (2016) <sup>24</sup> | UK     | Population-based case control study in primary care. Follow up 2009-2013                                                       | Primary care records (Clinical Practice Research Data linkage; CPRD). Death certificate data                 | N = 16,666; 58·1% female; mean age 39·9 (SD 16·2). 19·6% of sample had high support needs. | N=656 (3·9%); 55·6% female; age and level of ID not available                                                           | N= 113, 562; 58·1% female; mean age not available. Number of deaths= 1358 (1·2%); 60·4% female; mean age not available | ICD 10-chapter codes for respiratory disorders. | 90·91% (strong) |
| Janicki et al (1999) <sup>22</sup> | USA    | Cohort of adults with intellectual disabilities 40 years old and over. Follow up 1984-1993                                     | Data from state agency with responsibility for reviewing deaths of disabled persons. Health department data. | Total sample characteristics not available.                                                | N= 2752, 48·1% female; mean age- 65·1; ID 18%, 68% Moderate – profound (68%), 4% unspecified, 10% unknown               | Total sample characteristics not available. Number of deaths= 149, 980; gender not available, mean age= 70·0           | ICD 9-chapter codes for respiratory disorders.  | 77·27% (strong) |
| Ng et al (2017) <sup>12</sup>      | Sweden | Population-based case control study of adults with ID 55 years old and                                                         | National database of hospital admissions and outpatient care.                                                | N = 15, 289; 45·5% females; mean age not available; level of ID not available              | N= 4728; 44·9% female; age and ID level not available                                                                   | N= 74, 445; 45·5% females; mean age not available. Number of deaths= 8364                                              | ICD 10-chapter codes for respiratory disorders. | 95·45% (strong) |

1  
2

|                                                       |                                     |                           |                                                                                                                        |                                                                                                                                                    |                                                                                                                                                   |                                                                                                                                                                                            |                                                                                                                   |                                                 |                 |
|-------------------------------------------------------|-------------------------------------|---------------------------|------------------------------------------------------------------------------------------------------------------------|----------------------------------------------------------------------------------------------------------------------------------------------------|---------------------------------------------------------------------------------------------------------------------------------------------------|--------------------------------------------------------------------------------------------------------------------------------------------------------------------------------------------|-------------------------------------------------------------------------------------------------------------------|-------------------------------------------------|-----------------|
|                                                       |                                     | over. Follow up 2002-2015 | National disability register. Swedish National Cause of Death register                                                 |                                                                                                                                                    |                                                                                                                                                   |                                                                                                                                                                                            |                                                                                                                   |                                                 |                 |
| 7<br>8<br>9<br>10<br>11<br>12<br>13<br>14<br>15<br>16 | Oppewal et al (2018) <sup>27</sup>  | Netherlands               | Cohort study of adults with ID 50 years old and over living in three care organisations. Follow up Nov 2013-March 2018 | Medical case notes of participants with ID who died during study period. Cause specific mortality statistics for 50+ population in the Netherlands | N = 1050; 48·7% female; mean age= 61·6 (SD 8·0, range 50-94); ID level= 2·9% borderline, 21·2% mild, 48·2% moderate, 16·4% severe, 8·7% profound; | N=207 deaths (19·7%) but only 159 with cause of death available. 60·7% female; mean age not available; ID level= 5·7% borderline, 18·9% mild, 54·7% moderate, 13·2% severe, 7·5% profound; | Not available                                                                                                     | ICD 10-chapter codes for respiratory disorders. | 50·0% (weak)    |
| 17<br>18<br>19<br>20<br>21<br>22                      | Patja et al (2001) <sup>14</sup>    | Finland                   | Population based, nationwide cohort study. Follow up 1963-1997                                                         | Original 1962 population-based study (Amnell et al. 1964). Death certificate data                                                                  | N = 2,369, gender, age and level of ID not available                                                                                              | 1111 deaths with death certificates available for 1,095- 51·0% female, mean age= 57·7; ID 40·3% mild, 29·4% moderate, 11·5% severe, 18·0% profound, 0·7% unknown                           | Not available                                                                                                     | ICD 9-chapter codes for respiratory disorders.  | 81·82% (strong) |
| 23<br>24<br>25<br>26<br>27<br>28<br>29<br>30          | Raitasuo et al (1997) <sup>13</sup> | Finland                   | Cohort study of adults living in an institution. Follow up 1972-1993                                                   | Medical case notes and death certificate data. General population mortality statistics for population in Finland.                                  | N ≈ 2000; gender, age and level of ID not available                                                                                               | 216 deaths- 42·6% female; mean age 26·7 (1-86 years); ID level 2·0% borderline, 15·0% mild, 18·0% moderate, 20·0% severe, 45·0% profound, 20·0% unknown                                    | Not available                                                                                                     | ICD 9-chapter codes for respiratory disorders.  | 54·55% (weak)   |
| 31<br>32<br>33<br>34<br>35<br>36                      | Smith et al (2020) <sup>10</sup>    | UK                        | Nationwide, population based cohort study of children aged 4-19. Follow up 2008-2015.                                  | Scottish pupils census: Death certificates data                                                                                                    | N= 18, 278; 35% female; mean age not available                                                                                                    | N= 106; mean age= 14·3 (95% CI 13·4 to 15·1); level of ID not available                                                                                                                    | N= 777,912; 50% female; mean age not available. number of deaths= 458; mean age= 16·1 years (95% CI 15·8 to 16·5) | ICD 10-chapter codes for respiratory disorders. | 100% (strong)   |
| 37<br>38<br>39<br>40                                  | Trollor et al (2017) <sup>25</sup>  | Australia                 | Population based cohort study of adults 20 years old and above                                                         | Disability Services Minimal Dataset. Australian Bureau                                                                                             | N= 19,362; 44% female, mean age= 37 (range 27-48); ID not available                                                                               | N= 732 (4%); 41% female; median age = 54 (42-64), level of ID not available                                                                                                                | Total sample characteristics not available. Number of deaths= 305, 050; 49%                                       | ICD 10-chapter codes for respiratory disorders. | 95·45% (strong) |

41  
42  
43  
44  
45  
46



1  
2  
3  
4  
5  
6  
7  
8  
9  
10  
11  
12  
13  
14  
15  
16  
17  
18  
19  
20  
21  
22  
23  
24  
25  
26  
27  
28  
29  
30  
31  
32  
33  
34  
35  
36  
37  
38  
39  
40  
41  
42  
43  
44  
45  
46

|                                          |    |                                                                                                           |                                                                                                     |                                                            |                                                  |                                                                       |                                                           |                   |
|------------------------------------------|----|-----------------------------------------------------------------------------------------------------------|-----------------------------------------------------------------------------------------------------|------------------------------------------------------------|--------------------------------------------------|-----------------------------------------------------------------------|-----------------------------------------------------------|-------------------|
|                                          |    | registered with disability services. Follow up 2005-2011                                                  | of Statistics. Death records                                                                        |                                                            |                                                  | female; median age= 81 (70–92).                                       |                                                           |                   |
| Tyrer and McGrother (2009) <sup>23</sup> | UK | Population-based cohort study of individuals with moderate-profound ID on a register. Follow up 1993-2006 | Leicestershire learning disability register. Death certificate data. National Statistics 1993-2006. | N = 2,995; 41·9% female; Age and level of ID not available | N=503; gender, age and level of ID not available | Total sample characteristics not available. Number of deaths≈126, 000 | ICD 9 and ICD 10-chapter codes for respiratory disorders. | 72·73% (moderate) |

\*Individuals in the ID cohort died at a significantly younger age than the comparison cohort

## Summary of outcomes and statistical analysis

Findings of all included studies were combined in a narrative synthesis. The primary goal of the meta-analysis was to investigate if the SMRs of respiratory-associated deaths differ for individuals with and without intellectual disabilities. If SMRs were reported by specific respiratory causes, sex, age group, level of intellectual disability, socio-economic status or ethnicity, these were collected and presented for potential analysis (see table 2). Random effects meta-analysis was undertaken using RevMan. Included studies reported either:

- a SMR or hazard ratio (HR)

OR

- the observed number of deaths or expected deaths necessary to calculate a SMR. These were calculated using STATA (version 14) by dividing the observed number of deaths in a cohort study group by the expected mortality based on age and gender-specific death rates in the general population comparison group.

Random effects models were selected for all meta-analyses due to the different populations and measures in the included studies. Inverse of the variance method was used to calculate the weighted mean respiratory mortality log-SMR across studies, as well as for subgroup meta-analyses. As the SMR is a ratio, log transformation was needed to maintain symmetry in the analysis.[19] SMRs and HRs from each study were transformed to log values for computations and back transformed for presentation of the results. Weighted mean log-SMRs and their 95% confidence intervals were reported separately for individuals with and without intellectual disabilities. The magnitude of the back transformed ration and associated confidence interval (CI) were also reported. Where data permitted, further subgroup analyses were conducted to examine sources of heterogeneity. Where more than two studies reported sub-group level data, or cause-specific results of causes of respiratory deaths (e.g. pneumonia) random effects models were considered for subgroup meta-analyses.

For the random effects meta-analysis, heterogeneity was expected in the pooled result. Therefore, the Chi-squared statistic  $I^2$  was chosen to measure level of heterogeneity across the studies, as it allows for interpretation of results regardless of the number of studies included in the meta-analysis, the type of outcome data, or effect measurement.[20] Heterogeneity was interpreted as not observed when  $I^2=0\%$ , low when  $I^2=25\%$ , medium when  $I^2=50\%$ , and high when  $I^2=75\%$ .[20]

### Sensitivity analysis

Sensitivity analysis was used to assess the impact of risk of bias for each study on the weighted mean SMR. Data were removed one-by-one from the meta-analysis for each study, beginning with the lowest ranked papers, to determine their effect and re-estimate the weighted mean SMR. Cumulative analysis, starting with larger studies and sequentially adding smaller studies, was used to investigate how the weighted mean SMR estimate changes as small studies are added.[21]

### Patient and public involvement

No patient and public involved.

### Results

Figure 1 summarises the systematic search, selection and reasons for exclusion. All 17 studies were included in the narrative synthesis and 10 were included in the meta-analysis (studies with relevant SMRs n=8 and HR n=2). A full list of studies excluded from full-text screening is available in Appendix 2.

**[Insert Figure 1: PRISMA flow diagram of systematic search and selection]**

Table 1 illustrates the characteristics of studies reporting mortality rates for respiratory disorders and pneumonia in people with intellectual disabilities and table 2 presents all-cause mortality and deaths from respiratory disorders in people with intellectual disabilities.

Table 2: All-cause mortality and deaths from respiratory disorders in people with intellectual disabilities

1  
2  
3  
4  
5  
6  
7  
8  
9  
10  
11  
12  
13  
14  
15  
16  
17  
18  
19  
20  
21  
22  
23  
24  
25  
26  
27  
28  
29  
30  
31  
32  
33  
34  
35  
36  
37  
38  
39  
40  
41  
42  
43  
44  
45  
46

| Author                             | All-cause mortality                          | Deaths from respiratory disorders | Between group comparison of deaths from respiratory disorders | Deaths from individual respiratory disorders                                                                                                                                                                                                                                                                                                                                                                                                                                                                                                                                                                                                                                                                                                                                                  | Between group comparison of deaths from individual respiratory disorders                                                                                                                                                                                                                                                                                                                                            | Variables associated with risk of death from respiratory disorders                                                                                                                                                                                     |
|------------------------------------|----------------------------------------------|-----------------------------------|---------------------------------------------------------------|-----------------------------------------------------------------------------------------------------------------------------------------------------------------------------------------------------------------------------------------------------------------------------------------------------------------------------------------------------------------------------------------------------------------------------------------------------------------------------------------------------------------------------------------------------------------------------------------------------------------------------------------------------------------------------------------------------------------------------------------------------------------------------------------------|---------------------------------------------------------------------------------------------------------------------------------------------------------------------------------------------------------------------------------------------------------------------------------------------------------------------------------------------------------------------------------------------------------------------|--------------------------------------------------------------------------------------------------------------------------------------------------------------------------------------------------------------------------------------------------------|
| Brameld et al (2018) <sup>26</sup> | 591 had ID /63,508 out of all deaths (0.93%) | 62/591 (10.5%) deaths             | Not available                                                 | <p>Emergency Department presentations in the last year of life:</p> <p>Influenza and pneumonia RR=2.6 (95% CI 2.0-3.4 p&lt;0.001)</p> <p>Chronic obstructive pulmonary disease (COPD) RR=0.8 (95%CI 0.5-1.6, p=0.596)</p> <p>Asthma RR=4.7 (95%CI 2.1-10.4, p&lt;0.001)</p> <p>Ear, nose and throat infections RR=1.9 (95%CI 0.8-4.0, p=0.122)</p> <p>Pneumonitis due to solids/liquids RR=17.9 (95%CI 11.3-28.3 p&lt;0.001)</p> <p>Hospital admissions in the last year of life:</p> <p>Influenza and pneumonia RR=2.3 (1.0-5.3, p=0.044)</p> <p>COPD RR=1.4 (95%CI 0.9-2.4, p=0.164)</p> <p>Asthma RR=4.6 (95%CI 1.4-15.0, p=0.011)</p> <p>Ear, nose and throat infections RR=0.0 (95%CI 0.0-., p=0.972)</p> <p>Pneumonitis due to solids/liquids RR=17.6 (95%CI 11.7-26.5, p&lt;0.001)</p> | <p>Decedents with intellectual disability had increased odds of dying of (relative odds of having condition listed as underlying cause of death), adjusted for comorbidity:</p> <p>Influenza/pneumonia (OR=5.3, 95% CI 2.4-11.8)</p> <p>Pneumonitis due to solids or liquids (OR=9.9, 95% CI 5.1-19.3)</p> <p>Asthma (OR=2.3, 95% CI 1.0=5.2) (not significant)</p> <p>No difference for COPD as cause of death</p> | Decedents with intellectual disability had increased A&E attendance but received less hospital-based specialist palliative care. For those in hospitals, they were more likely to have hospital stays involving intensive care and ventilator support. |

1  
2  
3  
4  
5  
6  
7  
8  
9  
10  
11  
12  
13  
14  
15  
16  
17  
18  
19  
20  
21  
22  
23  
24  
25  
26  
27  
28  
29  
30  
31  
32  
33  
34  
35  
36  
37  
38  
39  
40  
41  
42  
43  
44  
45  
46

|                                   |                                                                   |                                                                                                                                     |                                                                                                                 |                                                                                                                              |                                                                                                                                                                                                                                                                                                                                                                                                                                                                                                                                                                                                                                                                                                                                                                                                                      |               |
|-----------------------------------|-------------------------------------------------------------------|-------------------------------------------------------------------------------------------------------------------------------------|-----------------------------------------------------------------------------------------------------------------|------------------------------------------------------------------------------------------------------------------------------|----------------------------------------------------------------------------------------------------------------------------------------------------------------------------------------------------------------------------------------------------------------------------------------------------------------------------------------------------------------------------------------------------------------------------------------------------------------------------------------------------------------------------------------------------------------------------------------------------------------------------------------------------------------------------------------------------------------------------------------------------------------------------------------------------------------------|---------------|
| Cooper et al (2020) <sup>28</sup> | 294/ 961 (30·6%) deaths<br><b>SMR = 2·24 (95% CI; 1·98, 2·49)</b> | Underlying cause of death: 57/ 262 (21·8%) deaths<br><b>SMR= 6·78 (95% CI; 5·02, 8·54)</b><br><br><b>(adjusted for age and sex)</b> | Underlying cause of death: Down syndrome: 8/ 57 (14·0%) deaths<br>Without Down syndrome: 49/ 205 (23·9%) deaths | All-contributing factors in death:<br><br>Respiratory infection = 27·1% deaths<br>Aspiration/ reflux/ choking = 19·8% deaths | Underlying cause of death:<br>Down syndrome:<br>Aspiration/ reflux/ choking = <5/ 57 deaths<br>Respiratory infection = <5/ 57 deaths<br>Other respiratory conditions = <5/ 57 deaths<br><br>Without Down syndrome:<br><br>Aspiration/ reflux/ choking = 22/ 205 (10·8%) deaths<br>Respiratory infection = 21/ 205 (10·3%) deaths<br>Other respiratory conditions = 9/ 205 (4·4%) deaths<br><br>All-contributing factors in death:<br><br>Down syndrome:<br>Respiratory infection = 22/ 57 (38·6%) deaths<br>Aspiration/ reflux/ choking = 11/ 57 (19·3%) deaths<br>Other respiratory conditions = <5/ 57 deaths<br><br>Without Down syndrome:<br><br>Respiratory infection = 49/ 205 (23·9%) deaths<br>Aspiration/ reflux/ choking = 41/ 205 (20·2%) deaths<br>Other respiratory conditions = 31/ 205 (15·1%) deaths | Not available |
|-----------------------------------|-------------------------------------------------------------------|-------------------------------------------------------------------------------------------------------------------------------------|-----------------------------------------------------------------------------------------------------------------|------------------------------------------------------------------------------------------------------------------------------|----------------------------------------------------------------------------------------------------------------------------------------------------------------------------------------------------------------------------------------------------------------------------------------------------------------------------------------------------------------------------------------------------------------------------------------------------------------------------------------------------------------------------------------------------------------------------------------------------------------------------------------------------------------------------------------------------------------------------------------------------------------------------------------------------------------------|---------------|

1  
2  
3  
4  
5  
6  
7  
8  
9  
10  
11  
12  
13  
14  
15  
16  
17  
18  
19  
20  
21  
22  
23  
24  
25  
26  
27  
28  
29  
30  
31  
32  
33  
34  
35  
36  
37  
38  
39  
40  
41  
42  
43  
44  
45  
46

For peer review only

|                                     |                                                                                |                                                                                                                                                                                                                                  |                                                                                                                                                                                                                                                                                                                                                            |                                                                                                                                      |               |                                                      |
|-------------------------------------|--------------------------------------------------------------------------------|----------------------------------------------------------------------------------------------------------------------------------------------------------------------------------------------------------------------------------|------------------------------------------------------------------------------------------------------------------------------------------------------------------------------------------------------------------------------------------------------------------------------------------------------------------------------------------------------------|--------------------------------------------------------------------------------------------------------------------------------------|---------------|------------------------------------------------------|
| Dupont et al (1987) <sup>40</sup>   | N=446 deaths / 7134 (5.9%) people with mild ID<br>N=277 males<br>N=169 females | Respiratory deaths common cause of death in people with ID (all ages)<br>Tests of significance only; respiratory deaths were more common for males with ID (all ages), and females aged 35-64, versus population of Denmark 1977 | Not available                                                                                                                                                                                                                                                                                                                                              | Not available                                                                                                                        | Not available | Not available                                        |
| Durvasula (2002) <sup>29</sup>      | 40/693 (6%) deaths                                                             | 14/40 (35%) deaths                                                                                                                                                                                                               | For people under 40, respiratory and external deaths were most common, for people over 40, cancer and respiratory deaths were most common<br>Age: 7/14 deaths in under 25-year-olds and 6/14 deaths in 40+ year olds<br>Sex: 11/14 deaths in males<br>Conditions: 2/14 had Down syndrome & dementia, 1/14 had myelodysplastic syndrome, 1x Battens disease | Not available                                                                                                                        | Not available | Age, gender, Down syndrome, myelodysplastic syndrome |
| Forsgren et al (1996) <sup>15</sup> | N=124 / 1478 (8.4%) people with ID (all ages), over 9,992 person-years         | N=13 /124 (10%) deaths were respiratory disease for people with ID vs n=3.9 expected,                                                                                                                                            | Respiratory disease was common cause of death for people with ID and epilepsy but SMR was not possible due to small sample size                                                                                                                                                                                                                            | Pneumonia was most common cause of death, but rarely reported as underlying cause<br><br>Pneumonia was most common cause of death in | Not available | Epilepsy (active seizures)                           |

1  
2  
3  
4  
5  
6  
7  
8  
9  
10  
11  
12  
13  
14  
15  
16  
17  
18  
19  
20  
21  
22  
23  
24  
25  
26  
27  
28  
29  
30  
31  
32  
33  
34  
35  
36  
37  
38  
39  
40  
41  
42  
43  
44  
45  
46

|                                  |                                                                                                                                                                                                                                          |                                                                                                                                                   |               |                                                                                                                                                                                                                                                                                                                                                                                                                                                                                                                                            |               |               |
|----------------------------------|------------------------------------------------------------------------------------------------------------------------------------------------------------------------------------------------------------------------------------------|---------------------------------------------------------------------------------------------------------------------------------------------------|---------------|--------------------------------------------------------------------------------------------------------------------------------------------------------------------------------------------------------------------------------------------------------------------------------------------------------------------------------------------------------------------------------------------------------------------------------------------------------------------------------------------------------------------------------------------|---------------|---------------|
|                                  | <p><b>SMR 2.0 (95% CI 1.7, 2.3)</b><br/>Males 1.6 (95% CI 1.2, 2.0),<br/>Females 2.6 (95% CI 2.0, 3.3)<br/><i>Additional: SMRs for severity of ID, epilepsy and cerebral palsy are available in appendix</i></p>                         | <p><b>SMR 3.3 (95% CI 2.0, 5.5)</b><br/><br/>(adjusted for age and sex)</p>                                                                       |               | <p>people with both epilepsy and ID</p>                                                                                                                                                                                                                                                                                                                                                                                                                                                                                                    |               |               |
| Glover et al (2017) <sup>8</sup> | <p>N=664 deaths for people with ID (all ages) over 59,279.7 person-years<br/>Crude rate 11.2 (10.4, 12.1) per 1000 person-years<br/><b>SMR 3.18 (2.94, 3.43)</b><br/><b>Women 3.40 (3.02, 3.81)</b><br/><b>Men 3.03 (2.73, 3.35)</b></p> | <p>N=114 deaths from respiratory causes for people with ID vs 23.3 expected<br/><b>SMR 4.9 (4.0, 5.9)</b><br/><br/>(adjusted for age and sex)</p> | Not available | <p>N=57 / 114 (50%) of respiratory deaths (and 8.6% of all deaths) were from influenza and pneumonia, vs expected 7.4 deaths<br/><b>SMR 7.7 (5.8, 9.9)</b><br/>Vast majority of pneumonia were unspecified (organism) n=24 / 114 (21%) respiratory deaths (3.6% of all deaths) were due to pneumonitis due to solids / liquids vs expected 1.1 deaths<br/><b>SMR 21.8 (13.9, 32.4)</b></p> <p>N=12 (1.8%) of all deaths were due to respiratory and intrathoracic cancers vs expected 16.6 deaths<br/><b>SMR 0.7, 95% CI 0.4–1.3).</b></p> | Not available | Not available |

1  
2  
3  
4  
5  
6  
7  
8  
9  
10  
11  
12  
13  
14  
15  
16  
17  
18  
19  
20  
21  
22  
23  
24  
25  
26  
27  
28  
29  
30  
31  
32  
33  
34  
35  
36  
37  
38  
39  
40  
41  
42  
43  
44  
45  
46

For peer review only

|                                    |                                                                                                                                                                                                                                                                      |                                                                                                              |               |                                                                                                                                                                                                                                                                                                          |               |                                       |
|------------------------------------|----------------------------------------------------------------------------------------------------------------------------------------------------------------------------------------------------------------------------------------------------------------------|--------------------------------------------------------------------------------------------------------------|---------------|----------------------------------------------------------------------------------------------------------------------------------------------------------------------------------------------------------------------------------------------------------------------------------------------------------|---------------|---------------------------------------|
| Heslop et al (2014) <sup>6</sup>   | N= 247 deaths in people with ID aged 4+<br>Rate of death 16.2 per 1000 person years<br>Median age of death: 64 (52, 75).<br><i>Additional; all-cause mortality for sex, ID severity, amenable mortality, patient care, &amp; accommodation available in appendix</i> | n=37 (15%) deaths had underlying cause due to respiratory diseases, vs 14.0% England & Wales deaths (p=0.66) | Not available | Not available                                                                                                                                                                                                                                                                                            | Not available | Reduced smoking in ID group<br>p=0.02 |
| Hollins et al (1998) <sup>11</sup> | 270/2,026 (13.3%) deaths<br>116/1,081 (10.7%) deaths on Wandsworth register<br>154/945 (16.3%) deaths on Kensington register                                                                                                                                         | Not available                                                                                                | Not available | Bronchopneumonia: N=56 (48%) (Wandsworth)<br>N=69 (45%) (Kensington)<br>COPD Emphysema:<br>N=1 (Wandsworth)<br>N=1 (Kensington)<br>Asphyxia:<br>N=4 (Wandsworth)<br>N=1 (Kensington)<br>Respiratory other:<br>N=4 (Wandsworth)<br>N=4 (Kensington)<br><br>52% of all deaths had a diagnosis of pneumonia | Not available | Not available                         |



1  
2  
3  
4  
5  
6  
7  
8  
9  
10  
11  
12  
13  
14  
15  
16  
17  
18  
19  
20  
21  
22  
23  
24  
25  
26  
27  
28  
29  
30  
31  
32  
33  
34  
35  
36  
37  
38  
39  
40  
41  
42  
43  
44  
45  
46

|                                    |                                                                   |                                                                                                                                           |                                                                                                                                                                                                                                                                                                                                                                                                                                                                                                                                                                                                                                                   |                                                                                                                                                                                                                                                          |                                                                                                                 |               |
|------------------------------------|-------------------------------------------------------------------|-------------------------------------------------------------------------------------------------------------------------------------------|---------------------------------------------------------------------------------------------------------------------------------------------------------------------------------------------------------------------------------------------------------------------------------------------------------------------------------------------------------------------------------------------------------------------------------------------------------------------------------------------------------------------------------------------------------------------------------------------------------------------------------------------------|----------------------------------------------------------------------------------------------------------------------------------------------------------------------------------------------------------------------------------------------------------|-----------------------------------------------------------------------------------------------------------------|---------------|
| Hosking et al (2016) <sup>24</sup> | 656/ 16666 (3.9%) deaths<br><b>HR = 3.62 (95% CI; 3.33, 3.93)</b> | 123/ 16666 (18.8%, rate= 24.8) deaths<br><b>HR = 6.68 (95% CI; 5.38, 8.29)</b><br><br><b>(adjusted for age, sex and general practice)</b> | Down syndrome = 24/ 1793 (20.3%) deaths.<br>General population: 135/ 113562 (rate= 3.9) deaths.                                                                                                                                                                                                                                                                                                                                                                                                                                                                                                                                                   | Pneumonia; n = 67/ 16666 (rate = 13.5)<br>Aspiration pneumonitis; n = 21/ 16666 (rate = 4.2)                                                                                                                                                             | General population:<br>Pneumonia; 39/ 113562 (rate = 1.1)<br>Aspiration pneumonitis; n = 6/ 113562 (rate = 0.2) | Not available |
| Janicki et al (1999) <sup>22</sup> | 2,752 deaths in the group aged 40+/4,183 all-age deaths (66%)     | 40+ year olds: N=548 (20%), rate: 201 per 100,000                                                                                         | Increasing by age decade:<br>aged 40s: 343 per 100,000 (16% of those who died)<br>aged 50s: 793 per 100,000 (20%)<br>aged 60s 1660 per 100,000 (25%)<br>aged 70+: 3441 per 100,000<br>Males with ID rate of death: 257 per 100,000<br>Females with ID rate of death: 331 per 100,000<br>Respiratory causes did not vary over the 10-year study period. Deaths due to respiratory diseases increased, with increasing age.<br>Gender: breathing obstructions were more prevalent among males.<br>Gender x age: respiratory disease was increased in the oldest groups, for males particularly while respiratory disease remained static as a cause | Breathing obstructions – 2.7% average deaths per year across 10 years, N=75, rate=27.5 per 100,000<br>Respiratory disease types: pneumonia was the most prevalent type of respiratory cause of death, with 43% of respiratory disease deaths in ID group | Not available                                                                                                   | Age, gender   |

1  
2  
3  
4  
5  
6  
7  
8  
9  
10  
11  
12  
13  
14  
15  
16  
17  
18  
19  
20  
21  
22  
23  
24  
25  
26  
27  
28  
29  
30  
31  
32  
33  
34  
35  
36  
37  
38  
39  
40  
41  
42  
43  
44  
45  
46

|                                    |                                              |                                                                                                                                                                                 |                                                                                                                                                                                                                                                               |                                                                                                                                                                                                                                                                                                                                                                                                                                     |               |               |
|------------------------------------|----------------------------------------------|---------------------------------------------------------------------------------------------------------------------------------------------------------------------------------|---------------------------------------------------------------------------------------------------------------------------------------------------------------------------------------------------------------------------------------------------------------|-------------------------------------------------------------------------------------------------------------------------------------------------------------------------------------------------------------------------------------------------------------------------------------------------------------------------------------------------------------------------------------------------------------------------------------|---------------|---------------|
|                                    |                                              |                                                                                                                                                                                 | of death for females across ages.                                                                                                                                                                                                                             |                                                                                                                                                                                                                                                                                                                                                                                                                                     |               |               |
| Ng et al. (2017) <sup>12</sup>     | 4,738/15,289 deaths in people aged 55+ (31%) | 807/4,738 (17%) respiratory deaths for those with ID<br><b>HR =12.5 (10.9, 14.2)</b><br><br><b>(adjusted for sex, year of birth and year of access to services)</b>             | ID rate: 423 per 100,000<br>DS rate: 3,187 per 1,000                                                                                                                                                                                                          | ID group (excludes DS)<br>Pneumonitis due to solids and liquids: 10%, rate 25 per 100,000<br>Pneumonia: 50%, rate 129 per 100,000<br>Other chronic obstructive pulmonary disease: 20%, 49 per 100,000<br>DS group<br>Pneumonitis due to solids and liquids 31.4%, 181 per 100,000<br>Pneumonia 20%, 113 per 100,000<br>Asthma 8%, 45 per 100,000<br>Bronchitis 8%, 45 per 100,000<br>Other respiratory disorders 8%, 45 per 100,000 | Not available | Not available |
| Oppewal et al (2018) <sup>27</sup> | 207/1050 ID=19.7%; 54/ 149 DS=26.1%          | 69/159 ID=44.3%; 33/45 DS only=73.3%; 36/114 ID with no DS=31.6%<br><br>Respiratory causes were the top primary causes of ID deaths.<br>Respiratory causes were the top primary | 5-year age bands:<br>50-54 ID=100% GP=3.3%; 55-59 ID=26.5% GP=4.7%; 60-64 ID=51.4% GP=6.0%; 65-69 ID=30.4% GP=6.7%; 70-74 ID=23.8% GP=8.6%; 75-79 ID=12.5% GP=9.4%; 80-84 ID=26.3% GP=9.4%; 85-90 ID=(0) GP=9.9%; 90-95 ID=40% GP=10.4%; 95+ ID=100% GP=10.9% | Pneumonia ID=80.4%;<br>Chronic obstructive pulmonary diseases ID=17.6%                                                                                                                                                                                                                                                                                                                                                              | Not available | Not available |

|    |                          |            |                                    |                                       |                           |                                   |
|----|--------------------------|------------|------------------------------------|---------------------------------------|---------------------------|-----------------------------------|
| 1  |                          |            |                                    |                                       |                           |                                   |
| 2  |                          |            |                                    |                                       |                           |                                   |
| 3  |                          |            |                                    |                                       |                           |                                   |
| 4  |                          |            |                                    |                                       |                           |                                   |
| 5  |                          |            |                                    |                                       |                           |                                   |
| 6  |                          |            |                                    |                                       |                           |                                   |
| 7  |                          |            |                                    |                                       |                           |                                   |
| 8  |                          |            |                                    |                                       |                           |                                   |
| 9  |                          |            |                                    |                                       |                           |                                   |
| 10 |                          |            |                                    |                                       |                           |                                   |
| 11 |                          |            |                                    |                                       |                           |                                   |
| 12 |                          |            |                                    |                                       |                           |                                   |
| 13 |                          |            |                                    |                                       |                           |                                   |
| 14 |                          |            |                                    |                                       |                           |                                   |
| 15 |                          |            |                                    |                                       |                           |                                   |
| 16 |                          |            |                                    |                                       |                           |                                   |
| 17 |                          |            |                                    |                                       |                           |                                   |
| 18 |                          |            |                                    |                                       |                           |                                   |
| 19 | Patja et al              | 1111/ 2369 | Immediate                          | Male:                                 | Pneumonia ID=83%;         | Pneumonia deaths (%):             |
| 20 | (2001) <sup>14</sup>     | ID =46.9%  | cause 322/1093                     | age 2-19 <b>SMR=5.8 (4.4 – 15.6);</b> | Chronic obstructive       | Profound ID=29%;                  |
| 21 |                          |            | ID=29%;                            | age 20-39 <b>SMR=5.4 (2.9 – 8.0);</b> | pulmonary disease ID=11%. | Severe ID=13%;                    |
| 22 |                          |            | Primary cause                      | age 40-59 <b>SMR=5.5 (3.5- 7.5);</b>  |                           | Moderate ID=33%;                  |
| 23 |                          |            | 241/1095                           | age 60+ <b>SMR=2.7 (2.7 – 4.8)</b>    |                           | Mild ID=25%.                      |
| 24 |                          |            | ID=22%                             |                                       |                           |                                   |
| 25 |                          |            | Respiratory                        | Female:                               |                           | Risk ratios compared to general   |
| 26 |                          |            | diseases second                    | age 2-19 <b>SMR=4.3 (0.3 – 4.7);</b>  |                           | population:                       |
| 27 |                          |            | largest cause of                   | age 20-39 <b>SMR=3.2 (1.1 – 5.1);</b> |                           | Mild ID 2.6 times higher;         |
| 28 |                          |            | ID death                           | age 40-59 <b>SMR=6.2 (4.1 – 8.2);</b> |                           | Profound ID 5.8 times higher.     |
| 29 |                          |            |                                    | age 60+ <b>SMR=3.3 (1.7 – 3.0)</b>    |                           | ID men higher risk than women     |
| 30 |                          |            | <b>SMR=3.76 (CI 3.31 to 4.27)*</b> |                                       |                           | in younger age groups (< 39       |
| 31 |                          |            | <b>(adjusted for</b>               |                                       |                           | years), but at lower risk from 60 |
| 32 |                          |            | <b>age and sex)</b>                |                                       |                           | years of age onwards.             |
| 33 |                          |            |                                    |                                       |                           |                                   |
| 34 |                          |            |                                    |                                       |                           |                                   |
| 35 |                          |            |                                    |                                       |                           |                                   |
| 36 |                          |            |                                    |                                       |                           |                                   |
| 37 | Raitauso et              | 216 deaths | Immediate                          | age 0-14 SMR=0.48;                    | Bronchopneumonia          | Not available                     |
| 38 | gal (1997) <sup>13</sup> |            | cause of death                     | age 15-44 SMR=3.46;                   | (immediate cause) ID=43%  |                                   |
| 39 |                          |            | 97/216 ID=45%                      | age 45-74 SMR=2.35;                   | Five patients had died of | Age (all respiratory)             |
| 40 |                          |            |                                    | age 75 SMR=0                          | pneumonia caused by       |                                   |

1  
2  
3  
4  
5  
6  
7  
8  
9  
10  
11  
12  
13  
14  
15  
16  
17  
18  
19  
20  
21  
22  
23  
24  
25  
26  
27  
28  
29  
30  
31  
32  
33  
34  
35  
36  
37  
38  
39  
40  
41  
42  
43  
44  
45  
46

For peer review only

|                                    |                                                                           |                                                                                                                                                                                                                                                  |                                                                                                                                                                                            |                                                                                                                                                                                                                                                                                                                                                          |                                                                                                  |               |
|------------------------------------|---------------------------------------------------------------------------|--------------------------------------------------------------------------------------------------------------------------------------------------------------------------------------------------------------------------------------------------|--------------------------------------------------------------------------------------------------------------------------------------------------------------------------------------------|----------------------------------------------------------------------------------------------------------------------------------------------------------------------------------------------------------------------------------------------------------------------------------------------------------------------------------------------------------|--------------------------------------------------------------------------------------------------|---------------|
|                                    |                                                                           | <p>Primary cause<br/>14/216 ID= 6%.</p> <p>Respiratory diseases were the dominant causes of ID death.</p> <p><b>SMR=2.15 (CI 1.18 – 3.61)</b></p> <p><b>(adjusted for age, and year of death)</b></p>                                            |                                                                                                                                                                                            | <p>aspiration. In one case fatal pneumonia had been caused by a fistula between the bronchus and the pleura. Besides pneumonia, two patients had acute laryngitis and one patient had hyperplasia of the lymph nodes of the lungs as the immediate cause of death. The latter had trisomy of chromosome 13 (Patau’s syndrome) as the basic disorder.</p> |                                                                                                  |               |
| Smith et al (2020) <sup>10</sup>   | <p>N = 106 (0.6%) deaths</p> <p><b>SMR = 11.6 (95% CI; 9.6, 14.0)</b></p> | <p>Underlying cause of death: N = 8/ 106 (8%) deaths</p> <p>All-contributing factors in death: n = 55. <b>CMR = 81.7 (95% CI; 62.7, 106.4) deaths</b></p> <p><b>SMR = 55.3 (95% CI; 42.5, 72.1)</b></p> <p><b>(adjusted for age and sex)</b></p> | <p>Underlying cause of death: General population: 17/ 458 (4%) deaths</p> <p>All-contributing factors in death: General population: n = 51. <b>CMR = 1.4 (95% CI; 1.1, 1.8) deaths</b></p> | <p>Underlying cause of death: Pneumonia including influenza; &lt;5/ 106</p> <p>All-contributing factors in death: Pneumonia= 27/ 106 (25.5%) deaths</p> <p>Respiratory failure; 17/ 106 (16.0%) deaths</p> <p>Respiratory disorders = 15/ 106 (14.2%) deaths</p> <p>Pneumonitis associated with food and vomit = 9/ 106 (8.5%) deaths</p>                | <p>General populations: All-contributing factors in death: Pneumonia = 21/ 458 (4.6%) deaths</p> | Not available |
| Trollor et al (2017) <sup>25</sup> | <p>732 / 19362 ID=4%</p> <p><b>SMR=1.3 (1.2 to 1.5)</b></p>               | <p>632/732 ID=86.3% had cause of death information</p> <p>78 ID=12% 4<sup>th</sup> top cause using the ID ABI conversion</p>                                                                                                                     | Not available                                                                                                                                                                              | Not available                                                                                                                                                                                                                                                                                                                                            | Not available                                                                                    | Not available |

|    |                                        |                                                                |               |                                                                                                                                            |                                                                                                                          |        |
|----|----------------------------------------|----------------------------------------------------------------|---------------|--------------------------------------------------------------------------------------------------------------------------------------------|--------------------------------------------------------------------------------------------------------------------------|--------|
| 1  |                                        |                                                                |               |                                                                                                                                            |                                                                                                                          |        |
| 2  |                                        |                                                                |               |                                                                                                                                            |                                                                                                                          |        |
| 3  |                                        | 130 ID=20% 1st top using the ID revised version                |               |                                                                                                                                            |                                                                                                                          |        |
| 4  |                                        | 16 ID=3% of respiratory deaths were considered avoidable.      |               |                                                                                                                                            |                                                                                                                          |        |
| 5  |                                        | 26242 GP=9% 3rd top underling cause                            |               |                                                                                                                                            |                                                                                                                          |        |
| 6  |                                        |                                                                |               |                                                                                                                                            |                                                                                                                          |        |
| 7  |                                        |                                                                |               |                                                                                                                                            |                                                                                                                          |        |
| 8  |                                        |                                                                |               |                                                                                                                                            |                                                                                                                          |        |
| 9  |                                        |                                                                |               |                                                                                                                                            |                                                                                                                          |        |
| 10 |                                        |                                                                |               |                                                                                                                                            |                                                                                                                          |        |
| 11 |                                        |                                                                |               |                                                                                                                                            |                                                                                                                          |        |
| 12 |                                        |                                                                |               |                                                                                                                                            |                                                                                                                          |        |
| 13 |                                        |                                                                |               |                                                                                                                                            |                                                                                                                          |        |
| 14 |                                        |                                                                |               |                                                                                                                                            |                                                                                                                          |        |
| 15 |                                        |                                                                |               |                                                                                                                                            |                                                                                                                          |        |
| 16 |                                        |                                                                |               |                                                                                                                                            |                                                                                                                          |        |
| 17 | Tyrer & McGrother (2009) <sup>23</sup> | 503/ 2995 (17%) deaths<br><b>SMR=2.77 (95% CI 2.53, 3.03).</b> | Not available | Bronchopneumonia; <b>SMR=6.47 (95% CI 5.00 8.23), O=66, E=10.2.</b><br>Other respiratory; <b>SMR=4.64 (CI 3.58 to 5.91). O=65, E=14.0.</b> | Male; <b>SMR=2.28 (95% CI; 2.02-2.56) O=278, E=121.8.</b><br>Female; <b>SMR=3.24 (95% CI; 2.83-3.69). O=225, E=69.4.</b> | Gender |
| 18 |                                        |                                                                |               |                                                                                                                                            |                                                                                                                          |        |
| 19 |                                        |                                                                |               |                                                                                                                                            |                                                                                                                          |        |
| 20 |                                        |                                                                |               |                                                                                                                                            |                                                                                                                          |        |
| 21 |                                        |                                                                |               |                                                                                                                                            |                                                                                                                          |        |
| 22 |                                        |                                                                |               |                                                                                                                                            |                                                                                                                          |        |

\*only where adjusted specifically for respiratory mortality

SMR=standardised mortality ratio/ CI=confidence interval/ RR=rate ratio/ HR=hazard ratio/CMF=comparative mortality figure/ OR=odds ratio/ O=observed deaths/ E=expected death\* calculated by authors using data from the study

## Study characteristics

Key features of all studies identified for inclusion in the review were tabulated (Table 1). These were cohort studies (n=12), case control studies (n=4) and one population-based audit of deaths in adults and children. These studies report data on 90,302 people with intellectual disabilities and 27,394 deaths. The average study size was 9,250 people. These studies were from the Netherlands (n = 1), Finland (n = 2), Australia (n = 3), the United Kingdom (n = 7), the United States of America (n = 1), Sweden (n = 2) and Denmark (n = 1).

## Definition of respiratory disorder

Thirteen out of 17 (76%) studies defined the respiratory disorder using ICD 9 -chapter codes[13-15,22,23] and ICD 10 – chapter codes for respiratory disorders.[8,10,12,23-26] The remaining four studies included in the systematic review did not define respiratory disorders.

## Causes of death from respiratory disorders

Thirteen papers reported on cause of deaths from respiratory disorders.[8,10-15,22-24,26-28] Pneumonia was reported as a cause of death in 12 studies.[8,10-15,22,23,26,27], five studies reported deaths from pneumonitis related to aspiration[8,10,12,14,24], five studies reported on chronic obstructive pulmonary disease (COPD)[11,12,14,26,27], one study reported on asthma<sup>31</sup> and one reported respiratory cancer deaths.[8]

## Evidence synthesis

### Respiratory-associated mortality

Five papers reported that respiratory disorders were the dominant cause of death in people with intellectual disabilities.[11,13,27,28,29] A further three studies found that deaths from respiratory disorders were the second most common cause of death.[12,14,24] Respiratory-associated deaths were in the top five main causes of deaths for a further four papers.[9,10,22,25] Comparative results (intellectual disabilities vs general population) for deaths due to respiratory disorders were reported in 10/17 (59%) of the studies.[5,8-10,12,22,24-26] In the majority of these studies rates of death from respiratory disorders were higher for people with intellectual disabilities than for people in the general population. However, Troller et al. (2017)[25] reported that respiratory-associated deaths in the general population were (9%) similar to the population with intellectual disabilities (12%). Hollins et al. (1998)[11] also reported that respiratory disorders were the most commonly cited cause of death for both groups.

### **Individual respiratory disorders and mortality**

Pneumonia was reported as the most common cause of respiratory death in people with intellectual disabilities.[8,10-15,22-24,26,27] Contributors to pneumonia deaths included influenza and injury from inhalation and aspiration events.[10,14] Pneumonitis featured as an underlying or contributing cause for between eight and 21% of respiratory-associated deaths in people with intellectual disabilities.[8,10,12] Crude comparison data showed people with intellectual disabilities were much more likely (between 10 and 20 times) to die from pneumonitis.[24,26] COPD was found to be a common cause of death in two studies focussing on older adults.[12,27]

### **Factors associated with respiratory-associated deaths experienced by people with intellectual disabilities**

Only four out of 17 (23.5%) papers directly reported on factors associated with the risk of respiratory-associated deaths[14,22,23,29] (see Table 2). Two reported SMRs separately for males and females[14,23], while two reported proportions of respiratory deaths between males and females. None directly compared males versus females or reported tests of significance. While one study reported higher respiratory SMS among females[23], another study reported separate SMRs for different age-bands which varied widely[14]. Group-level analysis was not possible. Level of intellectual disabilities was only reported as associated with respiratory related deaths in one study with 35 year follow up using relative risk but failed to report confidence or p-values.[14] This study found that, when compared to the general population, the relative risk of respiratory related deaths was 2.6 times higher for people with mild intellectual disabilities and 5.8 times higher for people with profound and multiple intellectual disabilities.

### **Respiratory mortality among children and young people**

Respiratory deaths amongst children and young people with intellectual disabilities were reported in five studies and found to be a common cause of death across all studies.[10,13,15,29,30] Four studies included comparison with the general population for respiratory causes of death, while one included the national population without intellectual disabilities[10]. All analyses were limited by the small numbers of death. Raitasuo et al. (1997) reported only one death.[13] Patja et al. (2001) reported higher SMR for males aged 2-19 years but not females.[30] Smith et al. reported 8% deaths had respiratory disease as the underlying cause but the SMR for underlying cause was not reported.[10]

### Meta-analytical outcomes

Ten studies[8,10-15,23,24,28] reported the necessary data to calculate (SMR, hazard ratio, or data necessary to calculate these) and were included in the meta-analysis of respiratory mortality of people with intellectual disabilities and the general population. As Hollins (1998) reported the SMR of two separate cohorts, these are displayed separately in the relevant forest plots.[11] The pooled SMRs for respiratory mortality between people with intellectual disabilities and the general population was 10·86 (95% CI 5·32, 22·18). The results indicate that respiratory mortality occurs ten times more frequently in the intellectual disabilities group than in the general population group. At the individual study level, this was adjusted for age (all studies) and for sex in all studies except two[11,13], where this was not clear. There was evidence of considerable statistical heterogeneity between studies in the meta-analyses, with  $I^2=99\cdot0\%$ . Results are displayed in Figure 2.

### Insert Figure 2: Forest plot of respiratory associated mortality

As five studies (12, 15, 23, 24, 28) focussed on adults only, one study (10) focussed on children only, and six (8, 11-15) included people of all ages, a sub-analysis was conducted of studies which reported data on an adult only population. The results of this sub-analysis are displayed in Figure 3. The pooled SMR reduced slightly from 10·86 (95% CI 5·32,22·18) to 6·53 (95% CI 4·29,9·96), after one study with a sample of primarily children was excluded.[10] Studies which included both adults and children in their sample[8,11-15] were next removed one at a time. First, both cohorts from Hollins (1998) were removed and the pooled SMR was reduced by around half, from 9·15 to 4·80[11]. The further removal of studies by Glover (2017)[8], Patja (2001)[14] and Raitasuo (1997)[13] resulted in a final pooled SMR for adults of 5·85 (95% CI 4·73,7·22,  $p<0\cdot001$ ). Heterogeneity between studies was also reduced from  $I^2=99\%$  to  $I^2=56\%$  by the exclusion of samples which included children.

### Insert figure 3: Forest plot for adults only

A sub-analysis was conducted of studies which reported an SMR for pneumonia.[8,11,23] The pooled SMR for pneumonia mortality for people with intellectual disabilities compared to the general population was 26·65 (95% CI 5·63, 126·24,  $p<0\cdot001$ ). These results, displayed in Figure 4, indicate that pneumonia related mortality occurs much more frequently in people with intellectual disabilities than in the general population group. Evidence of considerable statistical



1  
2 heterogeneity between studies was also present in this sub-analysis with  $I^2= 99.0\%$ . SMRs were  
3  
4 recalculated excluding the only study to include an adult only sample, Tyrer & McGrother  
5  
6 (2009)[23] resulting in a substantial increase in pooled SMR (95% CI from 26.65 to 42.70).  
7  
8

#### 9 **Insert figure 4: Forest plot for pneumonia related mortality**

10

#### 11 **Sensitivity analysis**

12  
13 Sensitivity analysis in relation to quality assessment was run for the ten studies included in the  
14  
15 meta-analysis (Appendix 3). Studies which were rated as weak[13] or moderate[23] were  
16  
17 removed from the analysis. The pooled SMR for mortality ratios changed slightly as Raitasuo  
18  
19 (1997)[13] (from 10.81 to 12.67)[27] and then Tyrer and McGrother (2009) (from 12.67 to  
20  
21 13.94)[23] were removed from the analysis. As the change in SMR was small, this suggests  
22  
23 that inclusion of weaker studies did not significantly change the results.  
24  
25

#### 26 **Discussion**

27  
28 This systematic review and meta-analysis highlights that people with intellectual disabilities  
29  
30 experience excess respiratory-associated deaths, with a respiratory mortality ten times greater  
31  
32 than for the general population. Respiratory mortality was more prevalent among studies which  
33  
34 include children, and pneumonia was a major contributor to the higher respiratory mortality  
35  
36 reported in this study. Clinical guidelines have contributed to a reduction in mortality from  
37  
38 community-acquired pneumonia.[31] We believe the evidence presented here highlights the  
39  
40 need for clinical guideline development groups to make recommendations on reducing the risks  
41  
42 of premature death due to community-acquired pneumonia amongst people with intellectual  
43  
44 disabilities. Vaccination programmes for influenza can help to reduce respiratory mortality in  
45  
46 children[32] and adults.[33] Although there is a relatively low uptake of influenza vaccine  
47  
48 amongst people with intellectual disabilities, annual health-checks for people with intellectual  
49  
50 disabilities have been reported to increase uptake of influenza immunisation.[34] People with  
51  
52 intellectual disabilities should be identified as a high-risk group and immunisation providers  
53  
54 should prioritise the improvement of vaccine uptake, for example through the roll-out of health  
55  
56 checks. People with intellectual disabilities are at increased risk of recurrent chest infections  
57  
58 which are secondary to dysphagia[35,36] with a high proportion of aspiration pneumonia-  
59  
60 related deaths occurring among individuals with severe and profound intellectual  
disabilities.[5,22,35,37,38] Increased recognition of the link between dysphagia and respiratory

1  
2 disorders among caregivers and practitioners is critical to ensuring the early identification of  
3 individuals with respiratory disorders.  
4  
5

6  
7 The higher risk of death from respiratory disorders, such as pneumonia, for people with  
8 intellectual disabilities is a significant concern in relation to the rapidly developing COVID-19  
9 pandemic[39,40]. Urgent action to disaggregate data on deaths from COVID-19 for people  
10 with intellectual disabilities and to investigate factors associated with COVID-19 related  
11 mortality for people with intellectual disabilities is vital to ensure that clinical guidelines are  
12 based on consideration of the specific risks faced by people with intellectual disabilities.  
13 Research is urgently required to investigate the risk factors associated with COVID-19 for  
14 people with intellectual disabilities to ensure carers and clinicians have access to the best  
15 evidence to reduce the risk of infection in those most vulnerable and to inform the clinical  
16 management of those who contract COVID-19. Carers and clinical staff must be given training  
17 to ensure they understand the human rights and health care needs of people with intellectual  
18 disabilities to ensure that existing stark disparities in the health of people with intellectual  
19 disabilities are not widened during this crisis.  
20  
21  
22  
23  
24  
25  
26  
27  
28  
29

30  
31 Interventions should focus on the pediatric age group. Among the studies included in this meta-  
32 analysis we found a relationship between inclusion of children and SMRs from respiratory  
33 causes, with those studies including children reporting higher SMRs. This is consistent with  
34 studies that have reported higher SMRs in children compared with adults in epilepsy[15] and  
35 cerebral palsy.[41] Overall, mortality in childhood is very low relative to adulthood, and in the  
36 pediatric age group chronic disabling conditions such as intellectual disability, epilepsy and  
37 cerebral palsy all have a marked impact on SMR. Co-morbidity with epilepsy and cerebral palsy  
38 are likely to be significant modifiers of the relationship between intellectual disability and  
39 respiratory mortality. Children with more severe intellectual disability are more likely to have  
40 epilepsy and cerebral palsy, both of which are independent risk factors for respiratory mortality.  
41  
42  
43  
44  
45  
46  
47  
48  
49

### 50 **Study strengths and limitations**

51 Our study has several strengths. The meta-analysis included mortality ratios from ten  
52 observational studies covering 1,844 respiratory deaths in people with intellectual disabilities,  
53 which has improved the power and precision to answer this important research question. A  
54 rigorous and systematic analysis process was undertaken, and we minimised the risk of bias,  
55 errors and omissions by having two or more reviewers conduct comprehensive searches, assess  
56  
57  
58  
59  
60

1  
2 study quality and extract descriptive data. Due to the low prevalence (~1%) of intellectual  
3 disabilities among the general population, low sample size was a considerable limitation,  
4 relative to other patient groups. However, our meta-analysis included two national [10,12], and  
5 five regional intellectual populations in their respective countries [11,15,23,28]. While  
6 heterogeneity was found, due to methodological and clinical diversity including study design,  
7 age and study nationality, this is common in meta-analyses and statistical heterogeneity was  
8 inevitable.[20] We have not included assessment of non-reporting or publication bias. Most of  
9 the research was conducted in Western countries, thus limiting the extent to which the findings  
10 may generalise to non-Western countries. Furthermore, ethnicity was not reported widely which  
11 prevented further analysis. There was variation among studies on how mortality was examined  
12 and how deaths were reported. There is a general lack of evidence on factors associated with  
13 the increased risk of respiratory related deaths in people with intellectual disabilities. As a  
14 consequence, we were not able to perform meta-regression on predictors or factors reported in  
15 studies which increase SMRs for respiratory deaths (age, sex, place of death, or severity of  
16 intellectual disabilities). This should be a priority for future research in order to inform the  
17 development of targeted interventions to prevent respiratory related deaths. Although the meta-  
18 analysis enables synthesis of data from a large sample, many of the individual studies reported  
19 on small samples and are at increased risk of bias. It is encouraging that there have been several  
20 larger studies in recent years and future research should focus on reporting respiratory mortality  
21 in representative, population-based samples. Furthermore, the majority of the studies included  
22 for review relied on death certificate data. One the most reported causes on the death certificate  
23 of people with intellectual disabilities is the intellectual disability itself. Given that this problem  
24 only exists within this population, true causes of death remain under-estimated.[42,43] As  
25 reporting has improved over the years, and many counties implemented automated coding  
26 systems, it is likely that older paper have more bias than more recent studies.

27  
28  
29  
30  
31  
32  
33  
34  
35  
36  
37  
38  
39  
40  
41  
42  
43  
44  
45  
46  
47 These findings signify the urgent need to develop and implement evidence-informed strategies  
48 to reduce premature mortality among people with intellectual disabilities. Respiratory disorders  
49 are a major cause of death for people with intellectual disabilities, many of which are avoidable  
50 with improved public health initiatives and access to good quality health and social care.  
51 However, further research is required to understand both the multifactorial causes of this  
52 heightened risk as well as the most effective approaches for the multi-professional clinical  
53 management of these risks.  
54  
55  
56  
57  
58  
59  
60

1  
2  
3 **Contributors:** MT, CM, AM, ER, LHM, DK, KD, GSS, AH & FB had full access to all the  
4 data, contributed to the systematic review and meta-analysis of studies, interpretation of  
5 results and the manuscript. JS and BJ helped interpret the result of the study and contributed  
6 to the manuscript. MT is study guarantor. All authors reviewed the final manuscript and  
7 agreed to be accountable for all aspects of the work and approved the final manuscript for  
8 submission. The corresponding author attests that all listed authors meet the authorship  
9 criteria and that no others meeting the criteria have been omitted.  
10  
11  
12  
13  
14  
15

16 **Funding** This work was supported by The Scottish Government grant number (HSCD  
17 169698)  
18  
19  
20

21 **Competing interests** None declared.  
22  
23

24 **Patient consent for publication** Not required  
25  
26  
27

28 **Ethics** Not required as this systematic review and meta-analysis was based on published data  
29  
30  
31

32 **Provenance and peer review:** Not commissioned; externally peer reviewed  
33  
34

35 **Data availability statement:** All data relevant to the study are included in the article or  
36 uploaded as supplementary information.  
37  
38

#### 39 **ORCID IDs**

40 Maria Truesdale 0000-0003-3081-7858  
41 Craig Melville 0000-0001-7234-2382  
42 Kirsty Dunn 0000-0003-1701-2190  
43 Angela Henderson 0000-0002-6146-3477  
44 Laura Hughes-McCormack 0000-0001-9498-8045  
45 Arlene McGarty 0000-0003-4937-0574  
46 Ewelina Rydzewska 0000-0002-9749-3133  
47 Gillian Smith 0000-0001-7241-695  
48 Joseph Symonds 0000-0002-2141-4216  
49 Bhautesh Jani 0000-0001-7348-514x  
50 Deborah Kinnear 0000-0002-2626-1554  
51  
52  
53  
54  
55  
56  
57  
58  
59  
60

## Figure captions

Figure 1: PRISMA flow diagram of systematic search and selection. A total of 2286 records were retrieved through a search of Embase, ISI Web of Science (all databases), CINAHL, and PsycINFO with an additional 9 records identified through other sources. After removing 241 duplicates, 2025 records were excluded due to ineligible types., the remaining 29 were retrieved as full-texts. From these 17 were included in the narrative review and 10 included in the meta-analysis.

Figure 2: Forest plot of respiratory associated mortality. The pooled SMRs for respiratory mortality between people with intellectual disabilities and the general population was 10·86 (95% CI 5·32, 22·18). There was considerable statistical heterogeneity between studies in the meta-analyses, with  $I^2=99\cdot0\%$ .

Figure 3: Forest plot for adults only. The pooled SMR for adults only was 5·85 (95% CI 4·73,7·22,  $p<0\cdot001$ ). Heterogeneity between studies was also reduced from  $I^2=99\%$  to  $I^2=56\%$  by the exclusion of samples which included children.

Figure 4: Forest plot for pneumonia related mortality. The pooled SMR for pneumonia mortality for people with intellectual disabilities compared to the general population was 26·65 (95% CI 5·63, 126·24,  $p<0\cdot001$ ). Evidence of considerable statistical heterogeneity between studies was also present in this sub-analysis with  $I^2=99\cdot0\%$ .

## References

- 1 Harris JC. Intellectual disability: Understanding its development, causes, classification, evaluation, and treatment. Oxford: Oxford University Press, 2006.
- 2 Maulik PK, Mascarenhas MN, Mathers CD, Dua T, Saxena S. Prevalence of intellectual disability: a meta-analysis of population-based studies. *Res Dev Disabil* 2011; **32(2)**: 419-36
- 3 Organisation W. The ICD-10 classification of mental and behavioural disorders. Clinical descriptions and diagnostic guidelines. Geneva: World Health Organisation, 1992.
- 4 World Health Organization. World health statistics 2015. Geneva: World Health Organization, 2015.
- 5 Heslop P, Blair P, Fleming P, Hoghton M, Marriott A, Russ L. Confidential Inquiry into premature deaths of people with learning disabilities (CIPOLD) Final Report <http://www.bristol.ac.uk/cipold/fullfinalreport.pdf> (2013) (accessed June 25, 2020).
- 6 Heslop P, Blair PS, Fleming P, Hoghton M, Marriott A, Russ L. The Confidential Inquiry into premature deaths of people with intellectual disabilities in the UK: a population-based study. *Lancet* 2014; **383(9920)**: 889-95.
- 7 O'Leary L, Cooper SA, Hughes-McCormack L. Early death and causes of death of people with intellectual disabilities: a systematic review. *J Appl Res Intellect Disabil* 2018; **31(3)**: 325-42.
- 8 Glover G, Williams R, Heslop P, Oyinlola J, Grey J. Mortality in people with intellectual disabilities in England. *J Intellect Disabil Res* 2017; **61(1)**: 62-74.
- 9 Tyrer F, Smith LK, McGrother CW. Mortality in adults with moderate to profound intellectual disability: a population-based study. *J Intellect Disabil Res* 2007; **51(7)**: 520-7.
- 10 Smith GS, Fleming M, Kinnear D, Henderson A, Pell JP, Melville C, Cooper S-A. Rates and causes of mortality among children and young people with and without intellectual disabilities in Scotland: a record linkage cohort study of 796,190 schoolchildren. *BMJ Open* 2020 (Accepted for Publication) DOI:10.1136/bmjopen-2019-034077.
- 11 Hollins S, Attard MT, Fraunhofer Nv, McGuigan S, Sedgwick. Mortality in people with learning disability: risks, causes, and death certification findings in London. *Dev Med Child Neurol* 1998; **40(1)**: 50-6.
- 12 Ng N, Wallén EF, Ahlström G. Mortality patterns and risk among older men and women with intellectual disability: a Swedish national retrospective cohort study. *BMC Geriatr* 2017; **17(1)**: 269.

- 13 Raitasuo J, Mölsä P, Raitasuo S, Mattila K. Deaths among the intellectually disabled: A retrospective study. *J Appl Res Intellect Disabil* 1997; **10(4)**: 280-8.
- 14 Patja K, Mölsä P, Iivanainen M. Cause-specific mortality of people with intellectual disability in a population-based, 35-year follow-up study. *J Intellect Disabil Res* 2001; **45(1)**: 30-40.
- 15 Forsgren L, Edvinsson SO, Nyström L, Blomquist HK. Influence of epilepsy on mortality in mental retardation: an epidemiologic study. *Epilepsia* 1996; **37(10)**: 956-63.
- 16 Moher D, Liberati A, Tetzlaff J, Altman DG. Preferred reporting items for systematic reviews and meta-analyses: the PRISMA statement. *Int J Surg* 2010; **8(5)**: 336-41.
- 17 Kmet LM, Cook LS, Lee RC. Standard quality assessment criteria for evaluating primary research papers from a variety of fields. HTA Initiative #13. Edmonton: Alberta Heritage Foundation for Medical Research, 2004.
- 18 Shea BJ, Bouter LM, Peterson J, Boers M, Andersson N, Ortiz Z, et al. External validation of a measurement tool to assess systematic reviews (AMSTAR). *PLoS One* 2007; **2(12)**: e1350. DOI:10.1371/journal.pone.0001350.
- 19 Borenstein M, Higgins JP, Hedges LV, Rothstein HR. Basics of meta-analysis:  $I^2$  is not an absolute measure of heterogeneity. *Res Synth Methods* 2017; **8(1)**: 5-18.
- 20 Higgins JP, Thompson SG, Deeks JJ, Altman DG. Measuring inconsistency in meta-analyses. *BMJ* 2003; **327(7414)**: 557-60.
- 21 Borenstein M. Common mistakes in meta-analysis and how to avoid them. New Jersey: Biostat. Inc, 2019: 388.
- 22 Janicki MP, Dalton AJ, Henderson CM, Davidson PW. Mortality and morbidity among older adults with intellectual disability: health services considerations. *Disabil Rehabil* 1999; **21(5-6)**: 284-94.
- 23 Tyrer F, McGrother C. Cause-specific mortality and death certificate reporting in adults with moderate to profound intellectual disability. *J Intellect Disabil Res* 2009; **53(11)**: 898-904.
- 24 Hosking FJ, Carey IM, Shah SM, Harris T, DeWilde S, Beighton C, et al. Mortality among adults with intellectual disability in England: comparisons with the general population. *Am J Public Health* 2016; **106(8)**: 1483-90.
- 25 Trollor J, Srasuebkul P, Xu H, Howlett S. Cause of death and potentially avoidable deaths in Australian adults with intellectual disability using retrospective linked data. *BMJ Open* 2017; **7(2)**: e013489. DOI:10.1136/bmjopen-2016-013489.

- 1  
2  
3  
4  
5  
6  
7  
8  
9  
10  
11  
12  
13  
14  
15  
16  
17  
18  
19  
20  
21  
22  
23  
24  
25  
26  
27  
28  
29  
30  
31  
32  
33  
34  
35  
36  
37  
38  
39  
40  
41  
42  
43  
44  
45  
46  
47  
48  
49  
50  
51  
52  
53  
54  
55  
56  
57  
58  
59  
60
- 26 Brameld K, Spilsbury K, Rosenwax L, Leonard H, Semmens J. Use of health services in the last year of life and cause of death in people with intellectual disability: a retrospective matched cohort study. *BMJ Open* 2018; 8(2):e020268. DOI:10.1136/bmjopen-2017-020268.
- 27 Oppewal A, Schoufour JD, van der Maarl HJ, Evenhuis HM, Hilgenkamp TI, Festen DA. Causes of mortality in older people with intellectual disability: results from the HA-ID study. *Am J Intellect Dev Disabil* 2018; **123(1)**: 61-71.
- 28 Cooper S-A, Allan L, Greenlaw N, McSkimming, P, Jasilek A, Henderson et al. Rates, causes, place and predictors of mortality in adults with intellectual disabilities with and without Down syndrome: cohort study with record linkage. *BMJ Open* 2020 (Accepted for Publication).
- 29 Durvasula S, Beange H, Baker W. Mortality of people with intellectual disability in northern Sydney. *J Intellect Dev Disabil* 2002; **27(4)**: 255-64.
- 30 Patja K, Iivanainen M, Vesala H, Oksanen H, Ruoppila I. Life expectancy of people with intellectual disability: a 35-year follow-up study. *J Intellect Disabil Res* 2000; **44(5)**: 591-9.
- 31 Mandell LA, Wunderink RG, Anzueto A, Bartlett JG, Campbell GD, Dean NC et al. Infectious Diseases Society of America/ American Thoracic Society consensus guidelines on the management of community-acquired pneumonia in adults. *Clin Infect Dis* 2007; **44 (Suppl 2)**: S27-72.
- 32 Flannery B, Reynolds SB, Blanton L, Santibanez TA, O'Halloran A, Lu PJ, et al. Influenza vaccine effectiveness against pediatric deaths: 2010–2014. *Pediatrics* 2017; **139(5)**: e20164244. DOI:10.1542/peds.2016-4244
- 33 Backer JA, Wallinga J, Meijer A, Donker GA, Van der Hoek W, Van Boven M. The impact of influenza vaccination on infection, hospitalisation and mortality in the Netherlands between 2003 and 2015. *Epidemics* 2019 Mar 1;26:77-85.
- 34 Robertson J, Hatton C, Emerson E, Baines S. The impact of health checks for people with intellectual disabilities: an updated systematic review of evidence. *Res Dev Disabil* 2014; **35(10)**: 2450-62.
- 35 Chadwick DD, Jolliffe J. A descriptive investigation of dysphagia in adults with intellectual disabilities. *J Intellect Disabil Res* 2009; **53(1)**: 29-43.
- 36 Robertson J, Chadwick D, Baines S, Emerson E, Hatton C. Prevalence of dysphagia in people with intellectual disability: a systematic review. *Intellect Dev Disabil* 2017; **55(6)**: 377-91.



- 1  
2  
3 37 Durvasula, S, Beange H, Baker, W. Mortality of people with intellectual disability in  
4 northern Sydney. *J Intellect Dev Disabil* 2002; **27(4)**: 255-264.  
5  
6 DOI:10.1080/1366825021000029311  
7  
8 38 Glover G, Ayub M. How people with learning disabilities die. Improving Health and Lives  
9 Learning Disabilities Observatory. Durham, 2010.  
10  
11 39 Landes SD, Turk MA, Formica MK, McDonald KE, Stevens JD. COVID\_19 outcomes  
12 among people with intellectual and developmental disability living in residential group  
13 homes in New York State. *Disability and Health Journal*, 2020 Oct 1;13(4): 100969  
14  
15 40 Cuypers M, Schalk BW, Koks-Leensen MC, Nägele ME, Bakker-van Gijssel EJ,  
16 Naaldenberg J, Leusink GL. Mortality of people with intellectual disabilities during the  
17 2017/2018 influenza epidemic in the Netherlands: potential implications for the  
18 COVID-19 pandemic. *Journal of Intellectual Disability Research*. 2020 May 26.  
19  
20 41 Blair E, Langdon K, McIntyre S, Lawrence D, Watson L. Survival and mortality in cerebral  
21 palsy: observations to the sixth decade from a data linkage study of a total population  
22 register and National Death Index. *BMC Neurol* 2019; **19(1)**: 111  
23  
24 42 Landes SD, Peek CW. Death by mental retardation? The influence of ambiguity on death  
25 certificate coding error for adults with intellectual disability. *Journal of Intellectual*  
26 *Disability Research*. 2013 Dec;57(12):1183-90.  
27  
28 43 Dunwoodie Stirton F, Heslop P. Medical certificates of cause of death for people with  
29 intellectual disabilities: a systematic literature review. *Journal of Applied Research in*  
30 *Intellectual Disabilities*. 2018 Sep;31(5):659-68.  
31  
32  
33  
34  
35  
36  
37  
38  
39  
40  
41  
42  
43  
44  
45  
46  
47  
48  
49  
50  
51  
52  
53  
54  
55  
56  
57  
58  
59  
60

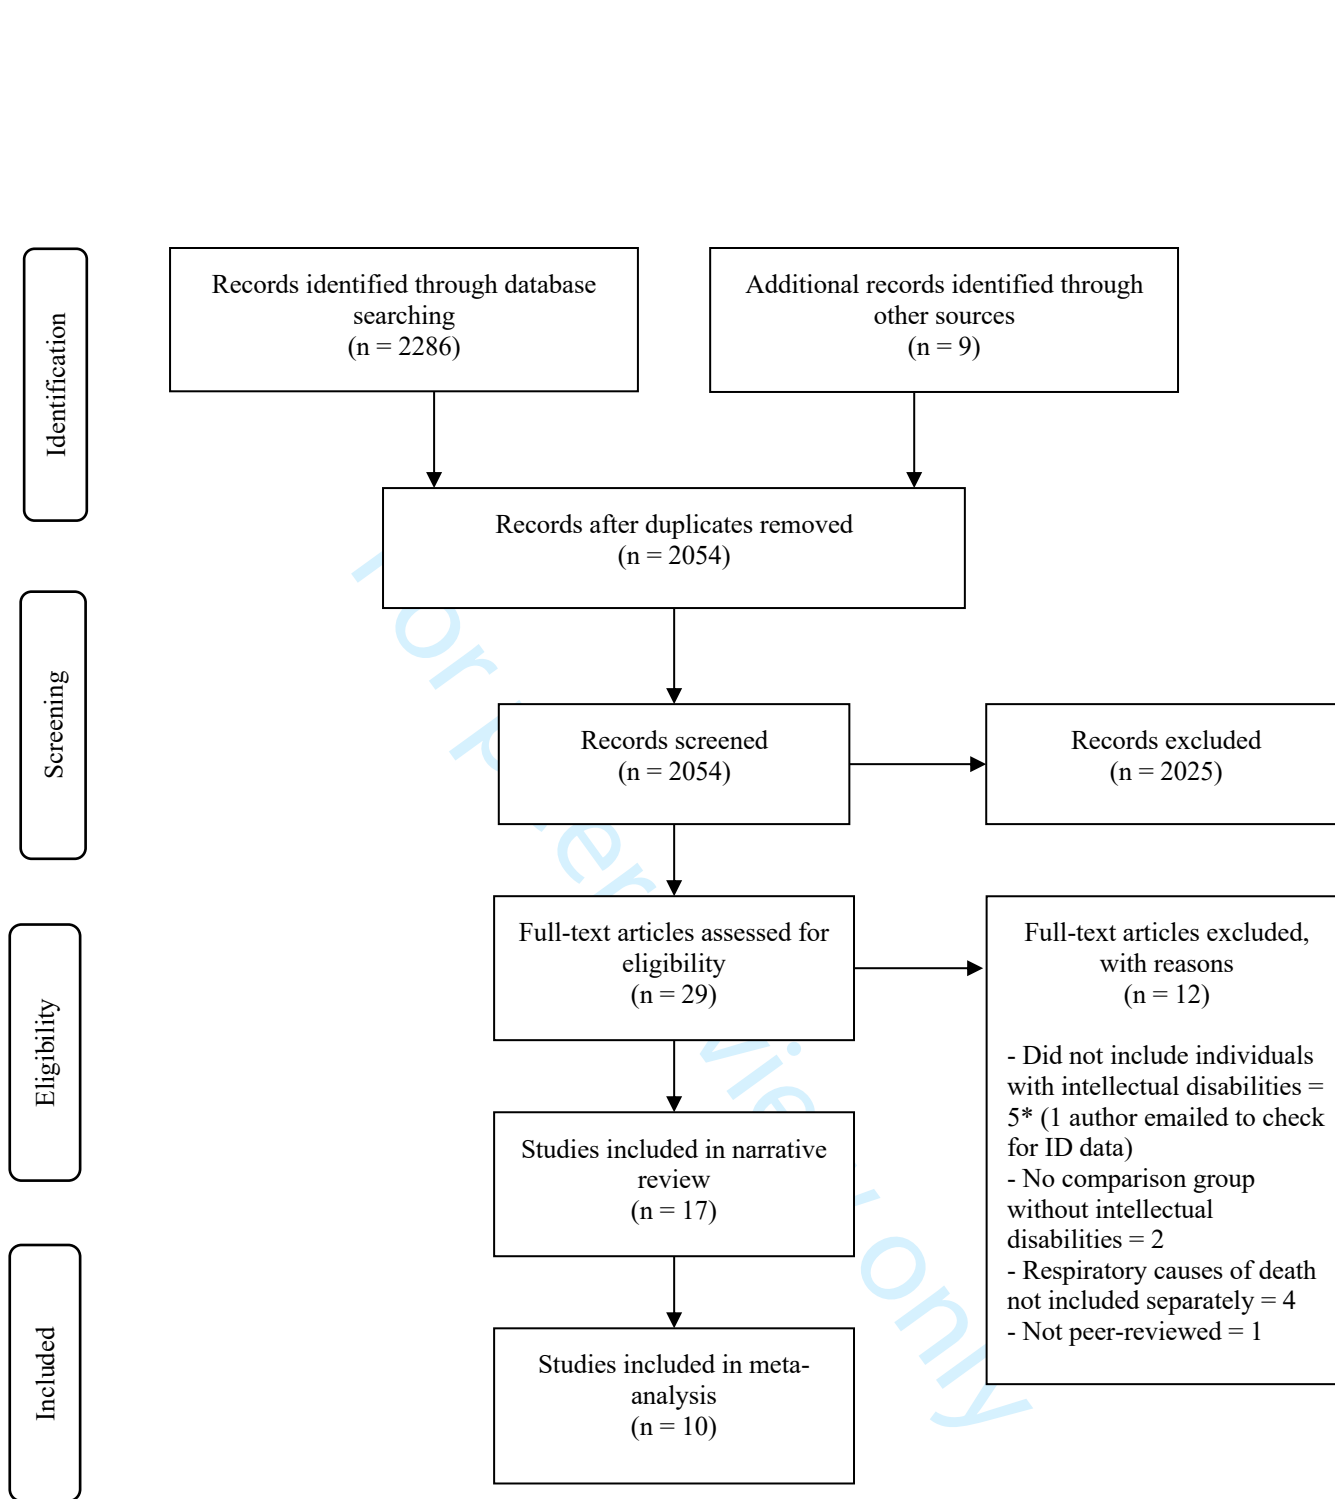

Figure 2: Forest plot of respiratory associated mortality

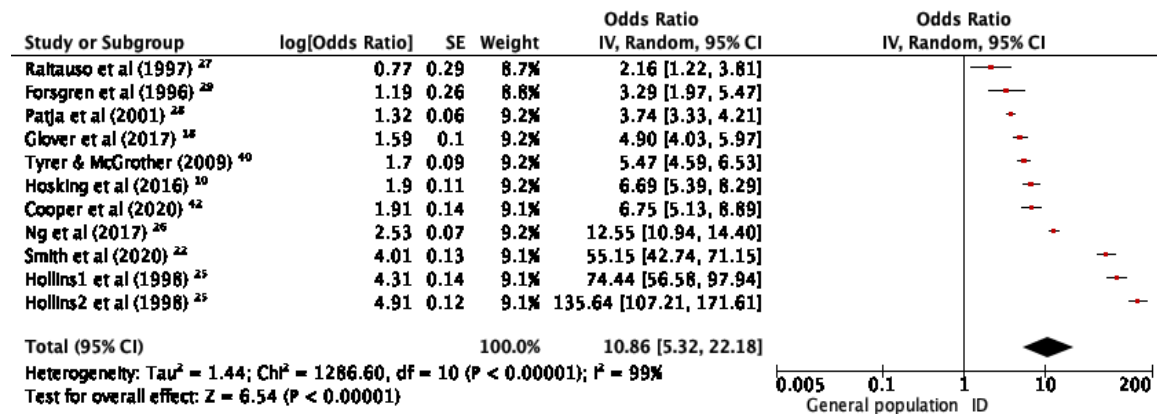

Figure 3: Forest plot for adults only

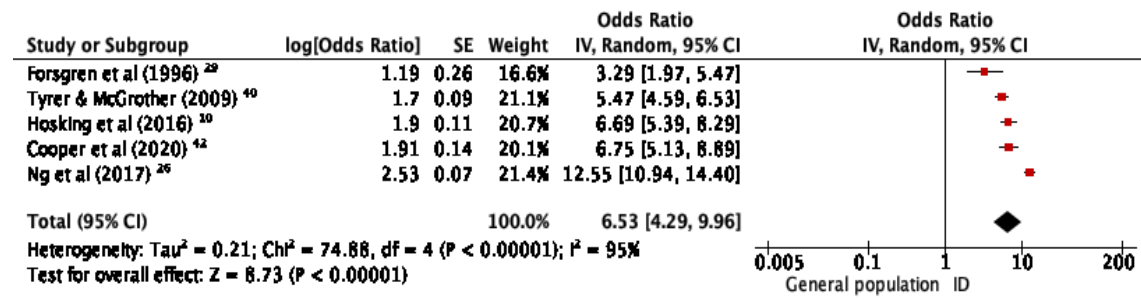

Figure 4: Forest plot for pneumonia related mortality

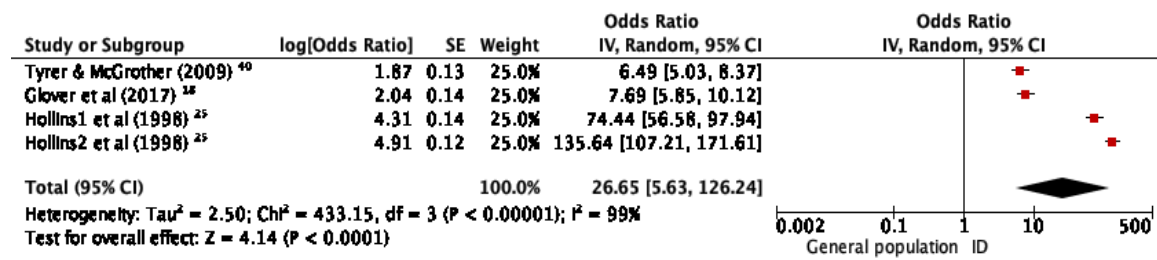

For peer review only

## Appendix 1: Search strategy

### Embase- Ovid, 2016-

| Search Terms |                                                                                                                                                                                                                                                                                                                                                                                                                                                                                                                                                                                                                                                                                                                                                                                                                                                                                                                                                                                                   |
|--------------|---------------------------------------------------------------------------------------------------------------------------------------------------------------------------------------------------------------------------------------------------------------------------------------------------------------------------------------------------------------------------------------------------------------------------------------------------------------------------------------------------------------------------------------------------------------------------------------------------------------------------------------------------------------------------------------------------------------------------------------------------------------------------------------------------------------------------------------------------------------------------------------------------------------------------------------------------------------------------------------------------|
| 1.           | developmental disorder/ or intellectual impairment/ or developmental disabilities/ or intellectual disability/ or mentally disabled persons/ or intellectual development disorder/ or "intellectual development disorder (attitudes toward)"/                                                                                                                                                                                                                                                                                                                                                                                                                                                                                                                                                                                                                                                                                                                                                     |
| 2.           | ((intellect\$ adj3 (deficien\$ or difficult\$ or disab\$ or disorder\$ or impair\$ or handicap\$ or incapacit\$ or handicap\$ or sub?average or sub?norm\$)) or (low\$2 adj2 intellect\$)).tw.                                                                                                                                                                                                                                                                                                                                                                                                                                                                                                                                                                                                                                                                                                                                                                                                    |
| 3.           | (learning adj3 (deficien\$ or difficult\$ or disab\$ or disorder\$ or handicap\$ or impair\$ or incapacit\$ or handicap\$ or sub?average or sub?norm\$)).tw.                                                                                                                                                                                                                                                                                                                                                                                                                                                                                                                                                                                                                                                                                                                                                                                                                                      |
| 4.           | (mental\$ adj3 (deficien\$ or disab\$ or handicap\$ or impair\$ or handicap\$ or incapacit\$ or retard\$ or sub?average or sub?norm\$)).tw.                                                                                                                                                                                                                                                                                                                                                                                                                                                                                                                                                                                                                                                                                                                                                                                                                                                       |
| 5.           | ((subaverage or sub\$1 average or subnormal or sub\$1 normal\$) adj3 (cognit\$ or intel\$)).tw.                                                                                                                                                                                                                                                                                                                                                                                                                                                                                                                                                                                                                                                                                                                                                                                                                                                                                                   |
| 6.           | ((development\$ or neurodevelopment\$) adj disab\$).tw.                                                                                                                                                                                                                                                                                                                                                                                                                                                                                                                                                                                                                                                                                                                                                                                                                                                                                                                                           |
| 7.           | (education\$ adj5 sub?norm\$).tw.                                                                                                                                                                                                                                                                                                                                                                                                                                                                                                                                                                                                                                                                                                                                                                                                                                                                                                                                                                 |
| 8.           | (cretin\$ or feeble minded\$ or imbecil\$ or moron\$).tw.                                                                                                                                                                                                                                                                                                                                                                                                                                                                                                                                                                                                                                                                                                                                                                                                                                                                                                                                         |
| 9.           | Or/ 1-9                                                                                                                                                                                                                                                                                                                                                                                                                                                                                                                                                                                                                                                                                                                                                                                                                                                                                                                                                                                           |
| 10.          | cause of death/ OR mortality/ OR fatal outcome/ OR death/ OR hospital mortality/ OR mortality.ti,ab OR fatal.ti,ab OR death.ti,ab                                                                                                                                                                                                                                                                                                                                                                                                                                                                                                                                                                                                                                                                                                                                                                                                                                                                 |
| 11.          | asthma/ OR asthma.ti,ab OR bronchial asthma.ti,ab OR asthma, bronchial.ti,ab OR pneumonia/ OR pneumonia.ti,ab OR lobar pneumonia.ti,ab OR lobar pneumonia.ti,ab OR pneumonia, lobar.ti,ab OR bacterial pneumonia/ OR pneumonia, bacterial.ti,ab OR viral pneumonia/ OR pneumonia, viral.ti,ab OR viral pneumonia.ti,ab OR bronchopneumonia/ OR bronchopneumonia.ti,ab OR bronchial pneumonia.ti,ab OR pneumonia, bronchial.ti,ab OR lung disease/ OR disease, lung.ti,ab OR pulmonary disease.ti,ab OR disease, pulmonary.ti,ab OR respiratory disease.ti,ab OR disease, respiratory.ti,ab OR chronic obstructive lung disease/ OR lung disease, obstructive.ti,ab OR obstructive lung disease.ti,ab OR obstructive lung diseases.ti,ab OR obstructive pulmonary diseases.ti,ab OR aspiration pneumonia/ OR aspiration pneumonia.ti,ab OR bronchiectasis/ OR bronchiectasis.ti,ab OR respiratory failure/ OR respiratory failure.ti,ab OR interstitial pneumonia/ Or interstitial pneumonia.ti,ab |
| 12.          | 9 and 10 and 11                                                                                                                                                                                                                                                                                                                                                                                                                                                                                                                                                                                                                                                                                                                                                                                                                                                                                                                                                                                   |

**Cinahl and APA PsychINFO - Ebscohost, 2016-**

| Search Terms |                                                                                                                                                                                                                                                                                                                                                                                                                                 |
|--------------|---------------------------------------------------------------------------------------------------------------------------------------------------------------------------------------------------------------------------------------------------------------------------------------------------------------------------------------------------------------------------------------------------------------------------------|
| 1.           | MH Intellectual disability                                                                                                                                                                                                                                                                                                                                                                                                      |
| 2.           | (MH “Mentally Disabled Persons”)                                                                                                                                                                                                                                                                                                                                                                                                |
| 3.           | TX (intellectual* N3 (disab* or disorder* or handicap* or impair* or deficien* or subnorm*))                                                                                                                                                                                                                                                                                                                                    |
| 4.           | TX (learning N3 (disab* or disorder* or impair* or difficllt*))                                                                                                                                                                                                                                                                                                                                                                 |
| 5.           | TX (development* N3 (disab* or disorder* or handicap* or impair* or delay*))                                                                                                                                                                                                                                                                                                                                                    |
| 6.           | TX (Mental* N3 (disab* or disorder* or handicap* or impair* or deficien* or subnorm* or retard*))                                                                                                                                                                                                                                                                                                                               |
| 7.           | ((development\$ or neurodevelopment\$) N disab\$).tw.                                                                                                                                                                                                                                                                                                                                                                           |
| 8.           | (education\$ N5 su?bnorm\$).tw.                                                                                                                                                                                                                                                                                                                                                                                                 |
| 9.           | (cretin\$ or feeble minded\$ or imbecil\$ or moron\$).tw.                                                                                                                                                                                                                                                                                                                                                                       |
| 10.          | S1 OR S2 OR S3 OR S4 OR S5 OR S6 OR S7 OR S8 OR S9 OR S10                                                                                                                                                                                                                                                                                                                                                                       |
| 11.          | cause of death/                                                                                                                                                                                                                                                                                                                                                                                                                 |
| 12.          | mortality/                                                                                                                                                                                                                                                                                                                                                                                                                      |
| 13.          | fatal outcome/                                                                                                                                                                                                                                                                                                                                                                                                                  |
| 14.          | death/                                                                                                                                                                                                                                                                                                                                                                                                                          |
| 15.          | hospital mortality/                                                                                                                                                                                                                                                                                                                                                                                                             |
| 16.          | mortality.ti.ab                                                                                                                                                                                                                                                                                                                                                                                                                 |
| 17.          | fatal.ti.ab                                                                                                                                                                                                                                                                                                                                                                                                                     |
| 18.          | death.ti.ab                                                                                                                                                                                                                                                                                                                                                                                                                     |
| 19.          | Or/ 11-18                                                                                                                                                                                                                                                                                                                                                                                                                       |
| 20.          | “pulmonary disease” or “airway disease” or “broncho-pulmonary disease” or “respiratory disease” or “lung disease” or “lung disorder” or “pulmonary disorder” or “respiratory disorder” or “pneumonia” or “bronchopneumonia” or “lung infection” or pulmonary infection” or respiratory infection” or “asthma” or “chronic obstructive pulmonary disease” or “aspiration pneumonia” or “bronchiectasis” or “respiratory failure” |
| 21.          | 10 and 19 and 20                                                                                                                                                                                                                                                                                                                                                                                                                |

Web of Science (All databases, including MEDLINE) 2016-current

TS= mortality OR death OR cause of death OR cause of mortality OR dead OR died  
AND

TS= intellectual disab\* or intellectual impair\* or developmental disab\* or learning disab\* or mental retard\* or mental handicap\*

AND

TS=asthma\* or bronchial asthma or pneumoni\* or lobar pneumoni\* or lobar pneumoni\* or bacterial pneumoni\* or viral pneumoni\* or bronchopneumonia\* or bronchial pneumoni\* or lung disease\* or lung disorder\* or lung infect\* or pulmonary disease\* or pulmonary disorder or pulmonary infect\* or respiratory disease\* or respiratory disorder or respiratory infect\* or obstructive lung disease\* or obstructive pulmonary disease\* or aspiration pneumoni\* or bronchiecstasi

1  
2  
3  
4  
5  
6  
7  
8  
9  
10  
11  
12  
13  
14  
15  
16  
17  
18  
19  
20  
21  
22  
23  
24  
25  
26  
27  
28  
29  
30  
31  
32  
33  
34  
35  
36  
37  
38  
39  
40  
41  
42  
43  
44  
45  
46  
47  
48  
49  
50  
51  
52  
53  
54  
55  
56  
57  
58  
59  
60

For peer review only



## Appendix 2: Excluded papers – References and reasons for exclusion

|    | Reference                                                                                                                                                                                                                                                     | Reason                                                      |
|----|---------------------------------------------------------------------------------------------------------------------------------------------------------------------------------------------------------------------------------------------------------------|-------------------------------------------------------------|
| 1  | Bilder D, Botts EL, Smith KR, Pimentel R, Farley M, Viskochil J. Excess mortality and causes of death in autism spectrum disorders: A follow up of the 1980s Utah/ UCLA autism epidemiologic study. <i>J Autism Dev Disord</i> 2013; <b>43(5)</b> : 1196-1204 | Did not include individuals with intellectual disabilities. |
| 2  | Decoufle P, Autry A. Increased mortality in children and adolescents with developmental disabilities. <i>Paediatr Perinat Epidemiol</i> 2002; <b>16(4)</b> : 375-382                                                                                          | No general population comparison group.                     |
| 3  | Florio T, Trollor J. Mortality among a cohort of persons with an intellectual disability in New South Wales, Australia. <i>J Appl Res Intellect Disabil</i> 2015; <b>28(5)</b> : 383-393.                                                                     | Respiratory causes of death not included separately.        |
| 4  | Glover G, Ayub M. How people with learning disabilities die. Improving Health and Lives Learning Disabilities Observatory. Durham, 2010.                                                                                                                      | Not peer-reviewed.                                          |
| 5  | Jahan I, Karim T, Das MC, Muhit M, McIntyre S, Smithers-Sheedy H, et al. Mortality in children with cerebral palsy in rural Bangladesh: a population-based surveillance study. <i>Dev Med Child Neurol</i> 2019; <b>61(11)</b> : 1336-1343                    | Did not include individuals with intellectual disabilities. |
| 6  | McCarron M, Carroll R, Kelly C, McCallion P. Mortality rates in the general Irish population compared to those with an intellectual disability from 2003 to 2012. <i>J Appl Res Intellect Disabil</i> 2015; <b>28(5)</b> : 406-413.                           | Respiratory causes of death not included separately.        |
| 7  | Perez CM, Ball SL, Wagner AP, Clare ICH, Holland AJ, Redley M. The incidence of healthcare use, ill health and mortality in adults with intellectual disabilities and mealtime support needs. <i>J Intellect Disabil Res</i> 2015; <b>59(7)</b> : 638-652     | No general population comparison group.                     |
| 8  | Reid, SM, Carlin JB, Reddihough DS. Survival of individuals with cerebral palsy born in Victoria, Australia, between 1970 and 2004. <i>Dev Med Child Neurol</i> 2012; <b>54(4)</b> : 353-360                                                                  | Did not include individuals with intellectual disabilities. |
| 9  | Shavelle, Robert M.; Strauss, David J.; Pickett, Jane Causes of death in autism. <i>J Autism Dev Disord</i> 2001; <b>31(6)</b> : 569-576                                                                                                                      | Did not include individuals with intellectual disabilities. |
| 10 | Similä S, Von Wendt L, Rantakallio P. Mortality of mentally retarded children to 17 years of age assessed in a prospective one-year birth cohort. <i>J Ment Defic Res</i> 1986; <b>30</b> : 401-5                                                             | Respiratory causes of death not included separately.        |

|    |                                                                                                                                                                                                                                |                                                                                                                                                                                         |
|----|--------------------------------------------------------------------------------------------------------------------------------------------------------------------------------------------------------------------------------|-----------------------------------------------------------------------------------------------------------------------------------------------------------------------------------------|
| 11 | Stankiewicz E, Ouellette-Kuntz H, McIsaac M, Shoostari S, Balogh R. Patterns of mortality among adults with intellectual and developmental disabilities in Ontario. <i>Can J Public Health</i> 2018; <b>109(5-6)</b> : 866-872 | <70%* of participants had intellectual disabilities.<br>*We emailed this author to check if >70% of sample had ID – they replied but didn't have the data to check, so it was excluded. |
| 12 | Tyrer F, Smith LK, McGrother CW. Mortality in adults with moderate to profound intellectual disability: a population-based study. <i>J Intellect Disabil Res</i> , 2007; <b>51(7)</b> : 520-527.                               | Respiratory causes of death not included separately.                                                                                                                                    |

Appendix 3: Sensitivity analysis A and B

Sensitivity A- minus Raitasuo

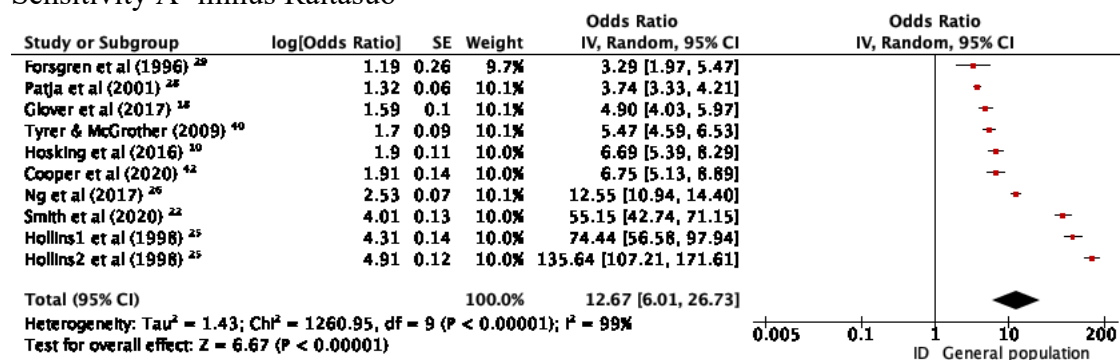

Or peer review only

## Sensitivity B- minus Raitasuo and Tyrer

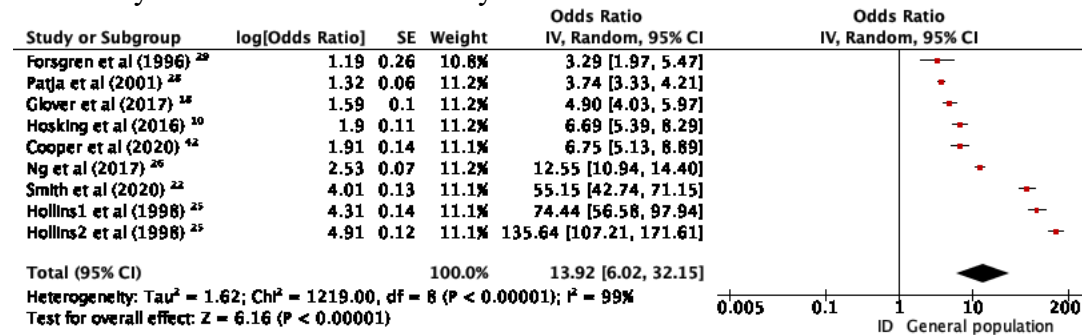

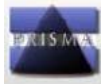

# PRISMA 2009 Checklist

1  
2  
3  
4  
5  
6  
7  
8  
9  
10  
11  
12  
13  
14  
15  
16  
17  
18  
19  
20  
21  
22  
23  
24  
25  
26  
27  
28  
29  
30  
31  
32  
33  
34  
35  
36  
37  
38  
39  
40  
41  
42  
43  
44  
45  
46  
47

| Section/topic                      | #  | Checklist item                                                                                                                                                                                                                                                                                              | Reported on page #     |
|------------------------------------|----|-------------------------------------------------------------------------------------------------------------------------------------------------------------------------------------------------------------------------------------------------------------------------------------------------------------|------------------------|
| <b>TITLE</b>                       |    |                                                                                                                                                                                                                                                                                                             |                        |
| Title                              | 1  | Identify the report as a systematic review, meta-analysis, or both.                                                                                                                                                                                                                                         | 2                      |
| <b>ABSTRACT</b>                    |    |                                                                                                                                                                                                                                                                                                             |                        |
| Structured summary                 | 2  | Provide a structured summary including, as applicable: background; objectives; data sources; study eligibility criteria, participants, and interventions; study appraisal and synthesis methods; results; limitations; conclusions and implications of key findings; systematic review registration number. | 3                      |
| <b>INTRODUCTION</b>                |    |                                                                                                                                                                                                                                                                                                             |                        |
| Rationale                          | 3  | Describe the rationale for the review in the context of what is already known.                                                                                                                                                                                                                              | 4                      |
| Objectives                         | 4  | Provide an explicit statement of questions being addressed with reference to participants, interventions, comparisons, outcomes, and study design (PICOS).                                                                                                                                                  | 4                      |
| <b>METHODS</b>                     |    |                                                                                                                                                                                                                                                                                                             |                        |
| Protocol and registration          | 5  | Indicate if a review protocol exists, if and where it can be accessed (e.g., Web address), and, if available, provide registration information including registration number.                                                                                                                               | 3                      |
| Eligibility criteria               | 6  | Specify study characteristics (e.g., PICOS, length of follow-up) and report characteristics (e.g., years considered, language, publication status) used as criteria for eligibility, giving rationale.                                                                                                      | 4/5                    |
| Information sources                | 7  | Describe all information sources (e.g., databases with dates of coverage, contact with study authors to identify additional studies) in the search and date last searched.                                                                                                                                  | 5                      |
| Search                             | 8  | Present full electronic search strategy for at least one database, including any limits used, such that it could be repeated.                                                                                                                                                                               | 5 and Appx 1 pgs 35-36 |
| Study selection                    | 9  | State the process for selecting studies (i.e., screening, eligibility, included in systematic review, and, if applicable, included in the meta-analysis).                                                                                                                                                   | 5                      |
| Data collection process            | 10 | Describe method of data extraction from reports (e.g., piloted forms, independently, in duplicate) and any processes for obtaining and confirming data from investigators.                                                                                                                                  | 5                      |
| Data items                         | 11 | List and define all variables for which data were sought (e.g., PICOS, funding sources) and any assumptions and simplifications made.                                                                                                                                                                       | 5                      |
| Risk of bias in individual studies | 12 | Describe methods used for assessing risk of bias of individual studies (including specification of whether this was done at the study or outcome level), and how this information is to be used in any data synthesis.                                                                                      | 6                      |
| Summary measures                   | 13 | State the principal summary measures (e.g., risk ratio, difference in means).                                                                                                                                                                                                                               | 11                     |

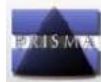

# PRISMA 2009 Checklist

|                      |    |                                                                                                                                                           |    |
|----------------------|----|-----------------------------------------------------------------------------------------------------------------------------------------------------------|----|
| Synthesis of results | 14 | Describe the methods of handling data and combining results of studies, if done, including measures of consistency (e.g., $I^2$ ) for each meta-analysis. | 11 |
|----------------------|----|-----------------------------------------------------------------------------------------------------------------------------------------------------------|----|

Page 1 of 2

| Section/topic                 | #  | Checklist item                                                                                                                                                                                           | Reported on page #          |
|-------------------------------|----|----------------------------------------------------------------------------------------------------------------------------------------------------------------------------------------------------------|-----------------------------|
| Risk of bias across studies   | 15 | Specify any assessment of risk of bias that may affect the cumulative evidence (e.g., publication bias, selective reporting within studies).                                                             | 12                          |
| Additional analyses           | 16 | Describe methods of additional analyses (e.g., sensitivity or subgroup analyses, meta-regression), if done, indicating which were pre-specified.                                                         | 12                          |
| <b>RESULTS</b>                |    |                                                                                                                                                                                                          |                             |
| Study selection               | 17 | Give numbers of studies screened, assessed for eligibility, and included in the review, with reasons for exclusions at each stage, ideally with a flow diagram.                                          | 12, 39                      |
| Study characteristics         | 18 | For each study, present characteristics for which data were extracted (e.g., study size, PICOS, follow-up period) and provide the citations.                                                             | 12-23                       |
| Risk of bias within studies   | 19 | Present data on risk of bias of each study and, if available, any outcome level assessment (see item 12).                                                                                                | -                           |
| Results of individual studies | 20 | For all outcomes considered (benefits or harms), present, for each study: (a) simple summary data for each intervention group (b) effect estimates and confidence intervals, ideally with a forest plot. | 25,26<br>Appx.3<br>pg 40-42 |
| Synthesis of results          | 21 | Present results of each meta-analysis done, including confidence intervals and measures of consistency.                                                                                                  | 25                          |
| Risk of bias across studies   | 22 | Present results of any assessment of risk of bias across studies (see Item 15).                                                                                                                          | -                           |
| Additional analysis           | 23 | Give results of additional analyses, if done (e.g., sensitivity or subgroup analyses, meta-regression [see Item 16]).                                                                                    | 26                          |
| <b>DISCUSSION</b>             |    |                                                                                                                                                                                                          |                             |
| Summary of evidence           | 24 | Summarize the main findings including the strength of evidence for each main outcome; consider their relevance to key groups (e.g., healthcare providers, users, and policy makers).                     | 26                          |
| Limitations                   | 25 | Discuss limitations at study and outcome level (e.g., risk of bias), and at review-level (e.g., incomplete retrieval of identified research, reporting bias).                                            | 27                          |
| Conclusions                   | 26 | Provide a general interpretation of the results in the context of other evidence, and implications for future research.                                                                                  | 28                          |
| <b>FUNDING</b>                |    |                                                                                                                                                                                                          |                             |
| Funding                       | 27 | Describe sources of funding for the systematic review and other support (e.g., supply of data); role of funders for the systematic review.                                                               | 29                          |

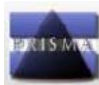

# PRISMA 2009 Checklist

1  
2  
3  
4  
5  
6  
7  
8  
9  
10  
11  
12  
13  
14  
15  
16  
17  
18  
19  
20  
21  
22  
23  
24  
25  
26  
27  
28  
29  
30  
31  
32  
33  
34  
35  
36  
37  
38  
39  
40  
41  
42  
43  
44  
45  
46  
47

From: Moher D, Liberati A, Tetzlaff J, Altman DG, The PRISMA Group (2009). Preferred Reporting Items for Systematic Reviews and Meta-Analyses: The PRISMA Statement. PLoS Med 6(7): e1000097. doi:10.1371/journal.pmed1000097

For more information, visit: [www.prisma-statement.org](http://www.prisma-statement.org).

Page 2 of 2

For peer review only

# BMJ Open

## Respiratory-associated deaths in people with intellectual disabilities: a systematic review and meta-analysis

|                                 |                                                                                                                                                                                                                                                                                                                                                                                                                                                                                                                                                                                                                                                                                                                                                                                                                                                                                                                                                                                                                                                                                                                                                                                                                                     |
|---------------------------------|-------------------------------------------------------------------------------------------------------------------------------------------------------------------------------------------------------------------------------------------------------------------------------------------------------------------------------------------------------------------------------------------------------------------------------------------------------------------------------------------------------------------------------------------------------------------------------------------------------------------------------------------------------------------------------------------------------------------------------------------------------------------------------------------------------------------------------------------------------------------------------------------------------------------------------------------------------------------------------------------------------------------------------------------------------------------------------------------------------------------------------------------------------------------------------------------------------------------------------------|
| Journal:                        | <i>BMJ Open</i>                                                                                                                                                                                                                                                                                                                                                                                                                                                                                                                                                                                                                                                                                                                                                                                                                                                                                                                                                                                                                                                                                                                                                                                                                     |
| Manuscript ID                   | bmjopen-2020-043658.R2                                                                                                                                                                                                                                                                                                                                                                                                                                                                                                                                                                                                                                                                                                                                                                                                                                                                                                                                                                                                                                                                                                                                                                                                              |
| Article Type:                   | Original research                                                                                                                                                                                                                                                                                                                                                                                                                                                                                                                                                                                                                                                                                                                                                                                                                                                                                                                                                                                                                                                                                                                                                                                                                   |
| Date Submitted by the Author:   | 26-Apr-2021                                                                                                                                                                                                                                                                                                                                                                                                                                                                                                                                                                                                                                                                                                                                                                                                                                                                                                                                                                                                                                                                                                                                                                                                                         |
| Complete List of Authors:       | <p>Truesdale, Maria; University of Glasgow College of Medical Veterinary and Life Sciences, Mental Health and Wellbeing<br/> Melville, Craig; University of Glasgow, Institute of Health and Wellbeing<br/> Barlow, Fiona; University of Glasgow College of Medical Veterinary and Life Sciences, Mental Health and Wellbeing<br/> Dunn, Kirsty; University of Glasgow College of Medical Veterinary and Life Sciences, Mental Health and Wellbeing<br/> Henderson, Angela; University of Glasgow, Institute of Health and Wellbeing<br/> Hughes-McCormack, Laura; University of Glasgow, Institute of Health and Wellbeing<br/> McGarty, Arlene; University of Glasgow College of Medical Veterinary and Life Sciences, Mental Health and Wellbeing<br/> Rydzewska, Ewelina; University of Glasgow<br/> Smith, Gillian; University of Glasgow College of Medical Veterinary and Life Sciences, Mental Health and Wellbeing<br/> Symonds, Joseph; University of Glasgow College of Medical Veterinary and Life Sciences, Mental Health and Wellbeing<br/> Jani, Bhautesh; University of Glasgow College of Medical Veterinary and Life Sciences<br/> Kinnear, Deborah; University of Glasgow, Institute of Health and Wellbeing</p> |
| <b>Primary Subject Heading</b>: | Respiratory medicine                                                                                                                                                                                                                                                                                                                                                                                                                                                                                                                                                                                                                                                                                                                                                                                                                                                                                                                                                                                                                                                                                                                                                                                                                |
| Secondary Subject Heading:      | Respiratory medicine                                                                                                                                                                                                                                                                                                                                                                                                                                                                                                                                                                                                                                                                                                                                                                                                                                                                                                                                                                                                                                                                                                                                                                                                                |
| Keywords:                       | RESPIRATORY MEDICINE (see Thoracic Medicine), PUBLIC HEALTH, Respiratory infections < THORACIC MEDICINE                                                                                                                                                                                                                                                                                                                                                                                                                                                                                                                                                                                                                                                                                                                                                                                                                                                                                                                                                                                                                                                                                                                             |
|                                 |                                                                                                                                                                                                                                                                                                                                                                                                                                                                                                                                                                                                                                                                                                                                                                                                                                                                                                                                                                                                                                                                                                                                                                                                                                     |

SCHOLARONE™  
Manuscripts





I, the Submitting Author has the right to grant and does grant on behalf of all authors of the Work (as defined in the below author licence), an exclusive licence and/or a non-exclusive licence for contributions from authors who are: i) UK Crown employees; ii) where BMJ has agreed a CC-BY licence shall apply, and/or iii) in accordance with the terms applicable for US Federal Government officers or employees acting as part of their official duties; on a worldwide, perpetual, irrevocable, royalty-free basis to BMJ Publishing Group Ltd ("BMJ") its licensees and where the relevant Journal is co-owned by BMJ to the co-owners of the Journal, to publish the Work in this journal and any other BMJ products and to exploit all rights, as set out in our [licence](#).

The Submitting Author accepts and understands that any supply made under these terms is made by BMJ to the Submitting Author unless you are acting as an employee on behalf of your employer or a postgraduate student of an affiliated institution which is paying any applicable article publishing charge ("APC") for Open Access articles. Where the Submitting Author wishes to make the Work available on an Open Access basis (and intends to pay the relevant APC), the terms of reuse of such Open Access shall be governed by a Creative Commons licence – details of these licences and which [Creative Commons](#) licence will apply to this Work are set out in our licence referred to above.

Other than as permitted in any relevant BMJ Author's Self Archiving Policies, I confirm this Work has not been accepted for publication elsewhere, is not being considered for publication elsewhere and does not duplicate material already published. I confirm all authors consent to publication of this Work and authorise the granting of this licence.

Title: "Respiratory-associated deaths in people with intellectual disabilities: a systematic review and meta-analysis"

## Authors

Maria Truesdale<sup>1</sup> (Senior lecturer of Intellectual Disabilities)  
Craig Melville<sup>1</sup> (Professor of Intellectual Disabilities Psychiatry)  
Fiona Barlow<sup>1</sup> (Impact and Communications Officer, Scottish Learning Disabilities Observatory)  
Kirsty Dunn<sup>1</sup> (Postdoctoral Research Associate)  
Angela Henderson<sup>1</sup> (Director of Policy and Impact, Scottish Learning Disabilities Observatory)  
Laura Hughes-McCormack<sup>1</sup> (Research Associate)  
Arlene McGarty<sup>1</sup> (Postdoctoral Research Associate)  
Ewelina Rydzewska<sup>1</sup>(Postdoctoral Research Associate)  
Gillian Smith<sup>1</sup> (Research Assistant)  
Joseph Symonds<sup>1</sup> (Honorary Clinical Lecturer)  
Bhautesh Jani<sup>1</sup> (Clinical Senior Lecturer/Honorary Consultant)  
Deborah Kinnear<sup>1</sup> (Senior lecturer of Intellectual Disabilities)

## Affiliations

<sup>1</sup> University of Glasgow, Institute of Health and Well-being, Glasgow, UK

## Address for correspondence

Dr Maria Truesdale  
Senior lecturer in Intellectual Disabilities  
College of Medical Veterinary and Life Sciences  
University of Glasgow  
Institute of Health and Well-being  
Mental Health and Well-being  
2<sup>nd</sup> floor Administration Building  
Gartnavel Royal Hospital  
1055 Great Western Road  
Glasgow  
G12 0 XH

Email: [maria.truesdale@glasgow.ac.uk](mailto:maria.truesdale@glasgow.ac.uk)

Tel: +44(0) 141 232 3926

Fax:+44 (0) 141 211 0356

Keywords: Respiratory disease, mortality, intellectual disability, systematic review, meta-analysis

Wordcount: 3893

## ABSTRACT

**Objective** To review and synthesise evidence on rates of respiratory-associated deaths and associated risk factors in the intellectual disability population.

**Design** Systematic review with meta-analysis

**Data sources** Embase, CINAHL, ISI Web of Science (all databases including Medline), and PsychINFO were searched for studies published between January 1985 to April 2020 and examined study and outcome quality. Reference lists and Google Scholar were also hand searched.

**Results** We identified 2,063 studies, 17 were included in the narrative synthesis and 10 studies (11 cohorts) in the meta-analysis. Data from 90,302 people with ID and 13,808 deaths from all causes in people with ID were extracted. Significantly higher rates of respiratory-associated deaths were found among people with ID (SMR 10·86 (95% CI 5·32, 22·18,  $p<0\cdot001$ ) compared to those in the general population, lesser rates for adults with intellectual disabilities (SMR 6·53 (95% CI 4·29, 9·96,  $p<0\cdot001$ ); and relatively high rates from pneumonia 26·65 (95% CI 5·63, 126·24,  $p<0\cdot001$ ). The overall statistical heterogeneity was  $I^2=99\cdot0\%$ .

**Conclusion** Premature deaths due to respiratory disorders are potentially avoidable with improved public health initiatives and equitable access to quality health care. Further research should focus on developing prognostic guidance and validated tools for clinical practice to mitigate risks of respiratory-associated deaths.

**PROSPERO registration number** CRD42020180479

### Article summary

#### Strengths and limitations of this study

- To our knowledge this is the first systematic review and meta-analysis on respiratory-associated deaths among people with intellectual disabilities.
- Included studies were limited by sample size
- There was no sufficient data and results provided by studies to investigate predictors or factors associated with respiratory-related deaths; meta-regression or stratification was not possible
- The meta-analysis included mortality ratios from ten observational studies covering 90,302 people with intellectual disabilities and 13,808 deaths from all causes in people with intellectual disabilities.

- A rigorous and systematic analysis process was undertaken which minimised the risk of bias, errors and omissions.

## Introduction

People with intellectual disabilities account for approximately 1-3% of the global population.[1,2] The World Health Organisation (1992)[3] defines intellectual disabilities as impairments in adaptive functioning, social functioning, and intellectual functioning, (IQ<70) requiring a need for daily support, with the onset in the developmental phase (<18 years). Whilst some heterogeneity is to be expected in the definition of intellectual disabilities across studies drawing on administrative datasets, the WHO definition can be applied to all studies included in this review. Life expectancy and mortality rates are important indicators of health inequality.[4] People with intellectual disabilities die up to 20 years earlier than the general population.[5-8] Respiratory disorders are a leading cause of death among people with intellectual disabilities.[6,9] The range of standardised mortality ratios (SMRs) due to respiratory disorders for people with intellectual disabilities are very high in some studies,[10-12] and much lower in others.[13-15]. Despite this, standardised mortality ratios (SMRs) due to respiratory disorders for people with intellectual disabilities differ widely across studies. Respiratory cause of mortality in people with intellectual disabilities has not been systematically examined. Previous studies have focused on either children and young people(4-19 years)[10] or older adults (55+years) on average[12]. This systematic review and meta-analysis aims to investigate and quantify the risk of, and factors associated with, respiratory-associated deaths in people with intellectual disabilities.

## Methods

The Preferred Reporting Items for Systematic Reviews and Meta-Analyses (PRISMA) checklist was followed.[16] This review was prospectively registered with the International Prospective Register of Systematic Reviews (PROSPERO, registration number: CRD42020180479).

## Eligibility

This systematic review included studies which analysed and presented data on people who were ascertained as having intellectual disabilities and a comparison group of individuals in the general population, with respiratory disorders included as a separate cause of death. For studies that included multiple disabilities, at least 70% of participants had to have intellectual

1  
2 disabilities, if results were not reported separately. Studies also had to be full-text, peer-  
3 reviewed, and published in English. To be included in the meta-analysis, studies had to report  
4 SMRs with 95% confidence intervals for respiratory associated deaths based on external  
5 comparison group or to have presented data allowing such outcomes to be derived. Studies were  
6 excluded if they focused on specific etiologies of intellectual disabilities, such as Down  
7 syndrome, as these are associated with a different health and mortality profiles compared to  
8 other people with intellectual disabilities. Studies were excluded if the full paper was not  
9 available in English. Studies focused on post-operative and post-treatment deaths were  
10 excluded as these are not representative of the wider population with intellectual disabilities.  
11 Studies with small samples (<20 participants) or case series designs were also excluded as these  
12 papers are less representative.  
13  
14  
15  
16  
17  
18  
19  
20  
21  
22

### 23 **Search strategy and selection criteria**

24 We searched Ovid Embase, ISI Web of Science (all databases), CINAHL, and PsycINFO from  
25 1<sup>st</sup> January 1985 to the 27<sup>th</sup> of April 2020, using comprehensive terms related to ‘intellectual  
26 disabilities’, ‘mortality’, and ‘respiratory disease’ (full search strategy in Appendix 1). In  
27 addition, a manual bibliography and citation search of included studies was conducted using  
28 Google Scholar and key researchers in the field of mortality in individuals with intellectual  
29 disabilities were emailed to identify any additional relevant papers. The aforementioned  
30 eligibility criteria were used. After duplicates were removed, all records were imported into  
31 Covidence software ([www.covidence.org](http://www.covidence.org)) for title and abstract and full text screening. All  
32 titles, abstracts (CM & AMcG) and full-texts (CM, AMcG, ER) were double-screened with  
33 inter-rater reliability (Cohen’s kappa) of  $\kappa = .57$  and  $\kappa = .58$ , respectively.  
34  
35  
36  
37  
38  
39  
40  
41  
42  
43

### 44 **Data Extraction**

45 Data extraction was conducted using a structured database created in Excel. Five researchers  
46 (GS, LHM, DK, KD, AMcG) each extracted data from 25% of the included studies and, to  
47 check reliability, one other researcher (CM) independently extracted data from 20% of included  
48 studies. Extracted data were compared in meetings and discrepancies resolved through  
49 consensus discussion. Researchers did not extract data on included papers where they were a  
50 listed author.  
51  
52  
53  
54  
55  
56

### 57 **Assessment of study and outcome quality**

1  
2  
3  
4  
5  
6  
7  
8  
9  
10  
11  
12  
13  
14  
15  
16  
17  
18  
19  
20  
21  
22  
23  
24  
25  
26  
27  
28  
29  
30  
31  
32  
33  
34  
35  
36  
37  
38  
39  
40  
41  
42  
43  
44  
45  
46  
47  
48  
49  
50  
51  
52  
53  
54  
55  
56  
57  
58  
59  
60

Study quality was appraised using the Standard Quality Assessment Criteria for Evaluating Primary Research Papers from a Variety of Fields.[17] Quality ratings were calculated in percentage form using the standard method[17] and categorised as weak (<55%), moderate (55-75%), or strong (>75%) quality. Each paper had quality appraisals completed by two researchers, who then agreed a consensus score for each item (Table 1).[17] Researchers did not evaluate quality of papers where they were a listed author. Risk of bias score was not used to exclude any studies from either the systematic review or meta-analysis. We evaluated the quality of our own systematic review using the Measurement Tool to Assess Systematic Reviews (AMSTAR) checklist.[18]

**Table 1: Characteristics of studies reporting mortality rates for respiratory disorders and pneumonia in people with intellectual disabilities**

| Author                               | Country   | Study design, setting and follow up                                                     | Data sources                                                                                                       | ID sample (N, % female, age, level of ID)                                                                                                     | Deaths in ID sample (N, % female, age at time of death, level of ID)           | Comparison sample (N, % female, age,) and deaths (n, % female, age)                                          | Respiratory disorder definition (e.g. ICD codes or other definitions) | Quality Percentage (assessment) |
|--------------------------------------|-----------|-----------------------------------------------------------------------------------------|--------------------------------------------------------------------------------------------------------------------|-----------------------------------------------------------------------------------------------------------------------------------------------|--------------------------------------------------------------------------------|--------------------------------------------------------------------------------------------------------------|-----------------------------------------------------------------------|---------------------------------|
| Brameld et al (2018) <sup>26</sup>   | Australia | Retrospective matched cohort study of adults 20 years old and over. Follow up 2009-2013 | Intellectual Disability Exploring Answers (IDEA) Database. Death certificate data                                  | Total sample characteristics not available                                                                                                    | N= 591; 43·8% female; mean age* and level of ID not available                  | Total sample characteristics not available. Number of deaths= 62, 917; 47·4% female; mean age not available  | ICD 10-chapter codes for respiratory disorders.                       | 95·45% (strong)                 |
| Cooper et al (2020) <sup>28</sup>    | UK        | Population-based cohort study. Follow up 2001-2018                                      | Primary care records and health check data; Death certificate data. Comparison data from Health Board statistics   | N= 962; 45·4% female; mean age= 44·1 years (range 16-83); ID Mild=382 (39·7%), Moderate=236 (24·5%), Severe=180 (18·7%), Profound=163 (17·0%) | N= 294/961 (30·6%); 47·5% female; mean age= 52·4 (SD 13·6)                     | Not available                                                                                                | ICD 10-chapter codes for respiratory disorders.                       | 86·36% (strong)                 |
| Dupont et al. (1987) <sup>40</sup>   | Denmark   | Population- based cohort study of adults with mild ID. Follow up 1976-1984              | Danish National Service for the Mentally Retarded. Death certificate data.                                         | N = 7134; gender, age and level of ID not available                                                                                           | N=446; 37·9% females; age and level of ID not available                        | Not available                                                                                                | Not described                                                         | 40·90% (weak)                   |
| Durvasula et al (2002) <sup>37</sup> | Australia | Population-based cohort study of children and adults. Follow up 1989 - 1999             | ID prevalence study. Death certificate data, medical records and post-mortem data. Australian Bureau of Statistics | N = 693; 44·6% female; mean age= N/A; ID 40% mild, 35% moderate, 25% severe/profound                                                          | N=40 (6%); 45% female; median age= 32 (range 10-59); level of ID not available | N= 125,848; 51% female; mean age not available. Number of deaths= 2154; 37·8% female; mean age not available | Not described                                                         | 90·91% (strong)                 |
| Forsgren et al (1996) <sup>15</sup>  | Sweden    | Population-based cohort study of adults with ID.                                        | Board for Provision and Services to the Mentally                                                                   | N = 1,478; 44·5% female; age and level of ID not available                                                                                    | N= 247; 42·1% female; Median age= 64 years (IQR 52-75 years); ID 39·7% Mild,   | Not available                                                                                                | ICD 9-chapter codes for respiratory disorders.                        | 81·82% (strong)                 |

1  
2  
3  
4  
5  
6  
7  
8  
9  
10  
11  
12  
13  
14  
15  
16  
17  
18  
19  
20  
21  
22  
23  
24  
25  
26  
27  
28  
29  
30  
31  
32  
33  
34  
35  
36  
37  
38  
39  
40  
41  
42  
43  
44  
45  
46

|                                    |        |                                                                                                                                |                                                                                                              |                                                                                            |                                                                                                                         |                                                                                                                        |                                                 |                 |
|------------------------------------|--------|--------------------------------------------------------------------------------------------------------------------------------|--------------------------------------------------------------------------------------------------------------|--------------------------------------------------------------------------------------------|-------------------------------------------------------------------------------------------------------------------------|------------------------------------------------------------------------------------------------------------------------|-------------------------------------------------|-----------------|
|                                    |        | Follow up 1986 – 1992                                                                                                          | Retarded. Death certificate data from Swedish National Bureau of Statistics                                  |                                                                                            | 31·2%, Moderate, 21·5% Severe 7·7% Profound                                                                             |                                                                                                                        |                                                 |                 |
| Glover et al (2017) <sup>8</sup>   | UK     | Population-based case control study in primary care. Follow up 2010-2014                                                       | Primary care records (CPRD). Death certificate data                                                          | Total sample characteristics not available                                                 | N = 664 deaths; 44·1% female                                                                                            | Total sample characteristics not available. N of deaths= 97, 379; 52·3% female; mean age not available                 | ICD 10-chapter codes for respiratory disorders. | 81·82% (strong) |
| Heslop et al (2014) <sup>5</sup>   | UK     | Population based audit of deaths of children and adults with intellectual disabilities aged 4 and over. Audit period 2010-2012 | Medical records Death certificate data from UK Office of National Statistics                                 | Total sample characteristics not available                                                 | N=247; 42·1% female; median age= 64 years (IQR 52-75 years); ID 39·7% mild, 31·2% moderate, 21·5% severe, 7·7% profound | Total sample characteristics not available. Number of deaths= 480, 467; 51·6% female; median age not available         |                                                 | 81·82% (strong) |
| Hollins et al (1998) <sup>11</sup> | UK     | Cohort study of adults on an ID register. Follow up 1982-1990                                                                  | Learning disability register. Death certificate data.                                                        | N = 2,026; gender, age and ID level not available                                          | N= 268 deaths; gender and age not available; 51·5% mild-moderate, 48·5% severe-profound                                 | Not available                                                                                                          | Not described                                   | 81·82% (strong) |
| Hosking et al (2016) <sup>24</sup> | UK     | Population-based case control study in primary care. Follow up 2009-2013                                                       | Primary care records (Clinical Practice Research Data linkage; CPRD). Death certificate data                 | N = 16,666; 58·1% female; mean age 39·9 (SD 16·2). 19·6% of sample had high support needs. | N=656 (3·9%); 55·6% female; age and level of ID not available                                                           | N= 113, 562; 58·1% female; mean age not available. Number of deaths= 1358 (1·2%); 60·4% female; mean age not available | ICD 10-chapter codes for respiratory disorders. | 90·91% (strong) |
| Janicki et al (1999) <sup>22</sup> | USA    | Cohort of adults with intellectual disabilities 40 years old and over. Follow up 1984-1993                                     | Data from state agency with responsibility for reviewing deaths of disabled persons. Health department data. | Total sample characteristics not available.                                                | N= 2752, 48·1% female; mean age- 65·1; ID 18%, 68% Moderate – profound (68%), 4% unspecified, 10% unknown               | Total sample characteristics not available. Number of deaths= 149, 980; gender not available, mean age= 70·0           | ICD 9-chapter codes for respiratory disorders.  | 77·27% (strong) |
| Ng et al (2017) <sup>12</sup>      | Sweden | Population-based case control study of adults with ID 55 years old and                                                         | National database of hospital admissions and outpatient care.                                                | N = 15, 289; 45·5% females; mean age not available; level of ID not available              | N= 4728; 44·9% female; age and ID level not available                                                                   | N= 74, 445; 45·5% females; mean age not available. Number of deaths= 8364                                              | ICD 10-chapter codes for respiratory disorders. | 95·45% (strong) |



1  
2  
3  
4  
5  
6  
7  
8  
9  
10  
11  
12  
13  
14  
15  
16  
17  
18  
19  
20  
21  
22  
23  
24  
25  
26  
27  
28  
29  
30  
31  
32  
33  
34  
35  
36  
37  
38  
39  
40  
41  
42  
43  
44  
45  
46

|                                     |             |                                                                                                                        |                                                                                                                                                    |                                                                                                                                                   |                                                                                                                                                                                            |                                                                                                                   |                                                 |                 |
|-------------------------------------|-------------|------------------------------------------------------------------------------------------------------------------------|----------------------------------------------------------------------------------------------------------------------------------------------------|---------------------------------------------------------------------------------------------------------------------------------------------------|--------------------------------------------------------------------------------------------------------------------------------------------------------------------------------------------|-------------------------------------------------------------------------------------------------------------------|-------------------------------------------------|-----------------|
|                                     |             | over. Follow up 2002-2015                                                                                              | National disability register. Swedish National Cause of Death register                                                                             |                                                                                                                                                   |                                                                                                                                                                                            |                                                                                                                   |                                                 |                 |
| Oppewal et al (2018) <sup>27</sup>  | Netherlands | Cohort study of adults with ID 50 years old and over living in three care organisations. Follow up Nov 2013-March 2018 | Medical case notes of participants with ID who died during study period. Cause specific mortality statistics for 50+ population in the Netherlands | N = 1050; 48.7% female; mean age= 61.6 (SD 8.0, range 50-94); ID level= 2.9% borderline, 21.2% mild, 48.2% moderate, 16.4% severe, 8.7% profound; | N=207 deaths (19.7%) but only 159 with cause of death available. 60.7% female; mean age not available; ID level= 5.7% borderline, 18.9% mild, 54.7% moderate, 13.2% severe, 7.5% profound; | Not available                                                                                                     | ICD 10-chapter codes for respiratory disorders. | 50.0% (weak)    |
| Patja et al (2001) <sup>14</sup>    | Finland     | Population based, nationwide cohort study. Follow up 1963-1997                                                         | Original 1962 population-based study (Amnell et al. 1964). Death certificate data                                                                  | N = 2,369, gender, age and level of ID not available                                                                                              | 1111 deaths with death certificates available for 1,095- 51.0% female, mean age= 57.7; ID 40.3% mild, 29.4% moderate, 11.5% severe, 18.0% profound, 0.7% unknown                           | Not available                                                                                                     | ICD 9-chapter codes for respiratory disorders.  | 81.82% (strong) |
| Raitasuo et al (1997) <sup>13</sup> | Finland     | Cohort study of adults living in an institution. Follow up 1972-1993                                                   | Medical case notes and death certificate data. General population mortality statistics for population in Finland.                                  | N ≈ 2000; gender, age and level of ID not available                                                                                               | 216 deaths- 42.6% female; mean age 26.7 (1-86 years); ID level 2.0% borderline, 15.0% mild, 18.0% moderate, 20.0% severe, 45.0% profound, 20.0% unknown                                    | Not available                                                                                                     | ICD 9-chapter codes for respiratory disorders.  | 54.55% (weak)   |
| Smith et al (2020) <sup>10</sup>    | UK          | Nationwide, population based cohort study of children aged 4-19. Follow up 2008-2015.                                  | Scottish pupils census: Death certificates data                                                                                                    | N= 18, 278; 35% female; mean age not available                                                                                                    | N= 106; mean age= 14.3 (95% CI 13.4 to 15.1); level of ID not available                                                                                                                    | N= 777,912; 50% female; mean age not available. number of deaths= 458; mean age= 16.1 years (95% CI 15.8 to 16.5) | ICD 10-chapter codes for respiratory disorders. | 100% (strong)   |
| Trollor et al (2017) <sup>25</sup>  | Australia   | Population based cohort study of adults 20 years old and above                                                         | Disability Services Minimal Dataset. Australian Bureau                                                                                             | N= 19,362; 44% female, mean age= 37 (range 27-48); ID not available                                                                               | N= 732 (4%); 41% female; median age = 54 (42-64), level of ID not available                                                                                                                | Total sample characteristics not available. Number of deaths= 305, 050; 49%                                       | ICD 10-chapter codes for respiratory disorders. | 95.45% (strong) |

1  
2  
3  
4  
5  
6  
7  
8  
9  
10  
11  
12  
13  
14  
15  
16  
17  
18  
19  
20  
21  
22  
23  
24  
25  
26  
27  
28  
29  
30  
31  
32  
33  
34  
35  
36  
37  
38  
39  
40  
41  
42  
43  
44  
45  
46

|                                          |    |                                                                                                           |                                                                                                     |                                                            |                                                  |                                                                       |                                                            |                   |
|------------------------------------------|----|-----------------------------------------------------------------------------------------------------------|-----------------------------------------------------------------------------------------------------|------------------------------------------------------------|--------------------------------------------------|-----------------------------------------------------------------------|------------------------------------------------------------|-------------------|
|                                          |    | registered with disability services. Follow up 2005-2011                                                  | of Statistics. Death records                                                                        |                                                            |                                                  | female; median age= 81 (70–92).                                       |                                                            |                   |
| Tyrer and McGrother (2009) <sup>23</sup> | UK | Population-based cohort study of individuals with moderate-profound ID on a register. Follow up 1993-2006 | Leicestershire learning disability register. Death certificate data. National Statistics 1993-2006. | N = 2,995; 41·9% female; Age and level of ID not available | N=503; gender, age and level of ID not available | Total sample characteristics not available. Number of deaths≈126, 000 | ICD 9 and ICD 10- chapter codes for respiratory disorders. | 72·73% (moderate) |

\*Individuals in the ID cohort died at a significantly younger age than the comparison cohort

## Summary of outcomes and statistical analysis

Findings of all included studies were combined in a narrative synthesis. The primary goal of the meta-analysis was to investigate if the SMRs of respiratory-associated deaths differ for individuals with and without intellectual disabilities. If SMRs were reported by specific respiratory causes, sex, age group, level of intellectual disability, socio-economic status or ethnicity, these were collected and presented for potential analysis (see table 2). Random effects meta-analysis was undertaken using RevMan. Included studies reported either:

- a SMR or hazard ratio (HR)

OR

- the observed number of deaths or expected deaths necessary to calculate a SMR. These were calculated using STATA (version 14) by dividing the observed number of deaths in a cohort study group by the expected mortality based on age and gender-specific death rates in the general population comparison group.

Random effects models were selected for all meta-analyses due to the different populations and measures in the included studies. Inverse of the variance method was used to calculate the weighted mean respiratory mortality log-SMR across studies, as well as for subgroup meta-analyses. As the SMR is a ratio, log transformation was needed to maintain symmetry in the analysis.[19] SMRs and HRs from each study were transformed to log values for computations and back transformed for presentation of the results. Weighted mean log-SMRs and their 95% confidence intervals were reported separately for individuals with and without intellectual disabilities. The magnitude of the back transformed ratio and associated confidence interval (CI) were also reported. Where data permitted, further subgroup analyses were conducted to examine sources of heterogeneity. Where more than two studies reported sub-group level data, or cause-specific results of causes of respiratory deaths (e.g. pneumonia) random effects models were considered for subgroup meta-analyses.

For the random effects meta-analysis, heterogeneity was expected in the pooled result. Therefore, the Chi-squared statistic  $I^2$  was chosen to measure level of heterogeneity across the studies, as it allows for interpretation of results regardless of the number of studies included in the meta-analysis, the type of outcome data, or effect measurement.[20] Heterogeneity was interpreted as not observed when  $I^2=0\%$ , low when  $I^2=25\%$ , medium when  $I^2=50\%$ , and high when  $I^2=75\%$ .[20]

### Sensitivity analysis

Sensitivity analysis was used to assess the impact of risk of bias for each study on the weighted mean SMR. Data were removed one-by-one from the meta-analysis for each study, beginning with the lowest ranked papers, to determine their effect and re-estimate the weighted mean SMR. Cumulative analysis, starting with larger studies and sequentially adding smaller studies, was used to investigate how the weighted mean SMR estimate changes as small studies are added.[21]

### Patient and public involvement

No patient and public involved.

### Results

Figure 1 summarises the systematic search, selection and reasons for exclusion. All 17 studies were included in the narrative synthesis and 10 were included in the meta-analysis (studies with relevant SMRs n=8 and HR n=2). A full list of studies excluded from full-text screening is available in Appendix 2.

**[Insert Figure 1: PRISMA flow diagram of systematic search and selection]**

Table 1 illustrates the characteristics of studies reporting mortality rates for respiratory disorders and pneumonia in people with intellectual disabilities and table 2 presents all-cause mortality and deaths from respiratory disorders in people with intellectual disabilities.

**Table 2: All-cause mortality and deaths from respiratory disorders in people with intellectual disabilities**

| Author                             | All-cause mortality                          | Deaths from respiratory disorders | Between group comparison of deaths from respiratory disorders | Deaths from individual respiratory disorders                                                                                                                                                                                                                                                                                                                                                                                                                                                                                                                                                                                                                                                                                                                                                  | Between group comparison of deaths from individual respiratory disorders                                                                                                                                                                                                                                                                                                                                            | Variables associated with risk of death from respiratory disorders                                                                                                                                                                                     |
|------------------------------------|----------------------------------------------|-----------------------------------|---------------------------------------------------------------|-----------------------------------------------------------------------------------------------------------------------------------------------------------------------------------------------------------------------------------------------------------------------------------------------------------------------------------------------------------------------------------------------------------------------------------------------------------------------------------------------------------------------------------------------------------------------------------------------------------------------------------------------------------------------------------------------------------------------------------------------------------------------------------------------|---------------------------------------------------------------------------------------------------------------------------------------------------------------------------------------------------------------------------------------------------------------------------------------------------------------------------------------------------------------------------------------------------------------------|--------------------------------------------------------------------------------------------------------------------------------------------------------------------------------------------------------------------------------------------------------|
| Brameld et al (2018) <sup>26</sup> | 591 had ID /63,508 out of all deaths (0.93%) | 62/591 (10.5%) deaths             | Not available                                                 | <p>Emergency Department presentations in the last year of life:</p> <p>Influenza and pneumonia RR=2.6 (95% CI 2.0-3.4 p&lt;0.001)</p> <p>Chronic obstructive pulmonary disease (COPD) RR=0.8 (95%CI 0.5-1.6, p=0.596)</p> <p>Asthma RR=4.7 (95%CI 2.1-10.4, p&lt;0.001)</p> <p>Ear, nose and throat infections RR=1.9 (95%CI 0.8-4.0, p=0.122)</p> <p>Pneumonitis due to solids/liquids RR=17.9 (95%CI 11.3-28.3 p&lt;0.001)</p> <p>Hospital admissions in the last year of life:</p> <p>Influenza and pneumonia RR=2.3 (1.0-5.3, p=0.044)</p> <p>COPD RR=1.4 (95%CI 0.9-2.4, p=0.164)</p> <p>Asthma RR=4.6 (95%CI 1.4-15.0, p=0.011)</p> <p>Ear, nose and throat infections RR=0.0 (95%CI 0.0-., p=0.972)</p> <p>Pneumonitis due to solids/liquids RR=17.6 (95%CI 11.7-26.5, p&lt;0.001)</p> | <p>Decedents with intellectual disability had increased odds of dying of (relative odds of having condition listed as underlying cause of death), adjusted for comorbidity:</p> <p>Influenza/pneumonia (OR=5.3, 95% CI 2.4-11.8)</p> <p>Pneumonitis due to solids or liquids (OR=9.9, 95% CI 5.1-19.3)</p> <p>Asthma (OR=2.3, 95% CI 1.0=5.2) (not significant)</p> <p>No difference for COPD as cause of death</p> | Decedents with intellectual disability had increased A&E attendance but received less hospital-based specialist palliative care. For those in hospitals, they were more likely to have hospital stays involving intensive care and ventilator support. |

1  
2  
3  
4  
5  
6  
7  
8  
9  
10  
11  
12  
13  
14  
15  
16  
17  
18  
19  
20  
21  
22  
23  
24  
25  
26  
27  
28  
29  
30  
31  
32  
33  
34  
35  
36  
37  
38  
39  
40  
41  
42  
43  
44  
45  
46

For peer review only

|                                         |                                                                           |                                                                                                                                               |                                                                                                                         |                                                                                                                                        |                                                                                                                                                                                                                                                                                                                                                                                                                                                                                                                                                                                                                                                                                                                                                                                                                                                                |                      |
|-----------------------------------------|---------------------------------------------------------------------------|-----------------------------------------------------------------------------------------------------------------------------------------------|-------------------------------------------------------------------------------------------------------------------------|----------------------------------------------------------------------------------------------------------------------------------------|----------------------------------------------------------------------------------------------------------------------------------------------------------------------------------------------------------------------------------------------------------------------------------------------------------------------------------------------------------------------------------------------------------------------------------------------------------------------------------------------------------------------------------------------------------------------------------------------------------------------------------------------------------------------------------------------------------------------------------------------------------------------------------------------------------------------------------------------------------------|----------------------|
| <p>Cooper et al (2020)<sup>28</sup></p> | <p>294/ 961 (30.6%) deaths<br/><b>SMR = 2.24 (95% CI; 1.98, 2.49)</b></p> | <p>Underlying cause of death: 57/ 262 (21.8%) deaths<br/><b>SMR= 6.78 (95% CI; 5.02, 8.54)</b><br/><br/><b>(adjusted for age and sex)</b></p> | <p>Underlying cause of death: Down syndrome: 8/ 57 (14.0%) deaths<br/>Without Down syndrome: 49/ 205 (23.9%) deaths</p> | <p>All-contributing factors in death:<br/><br/>Respiratory infection = 27.1% deaths<br/>Aspiration/ reflux/ choking = 19.8% deaths</p> | <p>Underlying cause of death:<br/>Down syndrome:<br/>Aspiration/ reflux/ choking = &lt;5/ 57 deaths<br/>Respiratory infection = &lt;5/ 57 deaths<br/>Other respiratory conditions = &lt;5/ 57 deaths<br/><br/>Without Down syndrome:<br/><br/>Aspiration/ reflux/ choking = 22/ 205 (10.8%) deaths<br/>Respiratory infection = 21/ 205 (10.3%) deaths<br/>Other respiratory conditions = 9/ 205 (4.4%) deaths<br/><br/>All-contributing factors in death:<br/><br/>Down syndrome:<br/>Respiratory infection = 22/ 57 (38.6%) deaths<br/>Aspiration/ reflux/ choking = 11/ 57 (19.3%) deaths<br/>Other respiratory conditions = &lt;5/ 57 deaths<br/><br/>Without Down syndrome:<br/><br/>Respiratory infection = 49/ 205 (23.9%) deaths<br/>Aspiration/ reflux/ choking = 41/ 205 (20.2%) deaths<br/>Other respiratory conditions = 31/ 205 (15.1%) deaths</p> | <p>Not available</p> |
|-----------------------------------------|---------------------------------------------------------------------------|-----------------------------------------------------------------------------------------------------------------------------------------------|-------------------------------------------------------------------------------------------------------------------------|----------------------------------------------------------------------------------------------------------------------------------------|----------------------------------------------------------------------------------------------------------------------------------------------------------------------------------------------------------------------------------------------------------------------------------------------------------------------------------------------------------------------------------------------------------------------------------------------------------------------------------------------------------------------------------------------------------------------------------------------------------------------------------------------------------------------------------------------------------------------------------------------------------------------------------------------------------------------------------------------------------------|----------------------|

1  
2  
3  
4  
5  
6  
7  
8  
9  
10  
11  
12  
13  
14  
15  
16  
17  
18  
19  
20  
21  
22  
23  
24  
25  
26  
27  
28  
29  
30  
31  
32  
33  
34  
35  
36  
37  
38  
39  
40  
41  
42  
43  
44  
45  
46

For peer review only

|                                     |                                                                                |                                                                                                                                                                                                                                  |                                                                                                                                                                                                                                                                                                                                                            |                                                                                                                                      |               |                                                      |
|-------------------------------------|--------------------------------------------------------------------------------|----------------------------------------------------------------------------------------------------------------------------------------------------------------------------------------------------------------------------------|------------------------------------------------------------------------------------------------------------------------------------------------------------------------------------------------------------------------------------------------------------------------------------------------------------------------------------------------------------|--------------------------------------------------------------------------------------------------------------------------------------|---------------|------------------------------------------------------|
| Dupont et al (1987) <sup>40</sup>   | N=446 deaths / 7134 (5.9%) people with mild ID<br>N=277 males<br>N=169 females | Respiratory deaths common cause of death in people with ID (all ages)<br>Tests of significance only; respiratory deaths were more common for males with ID (all ages), and females aged 35-64, versus population of Denmark 1977 | Not available                                                                                                                                                                                                                                                                                                                                              | Not available                                                                                                                        | Not available | Not available                                        |
| Durvasula (2002) <sup>29</sup>      | 40/693 (6%) deaths                                                             | 14/40 (35%) deaths                                                                                                                                                                                                               | For people under 40, respiratory and external deaths were most common, for people over 40, cancer and respiratory deaths were most common<br>Age: 7/14 deaths in under 25-year-olds and 6/14 deaths in 40+ year olds<br>Sex: 11/14 deaths in males<br>Conditions: 2/14 had Down syndrome & dementia, 1/14 had myelodysplastic syndrome, 1x Battens disease | Not available                                                                                                                        | Not available | Age, gender, Down syndrome, myelodysplastic syndrome |
| Forsgren et al (1996) <sup>15</sup> | N=124 / 1478 (8.4%) people with ID (all ages), over 9,992 person-years         | N=13 /124 (10%) deaths were respiratory disease for people with ID vs n=3.9 expected,                                                                                                                                            | Respiratory disease was common cause of death for people with ID and epilepsy but SMR was not possible due to small sample size                                                                                                                                                                                                                            | Pneumonia was most common cause of death, but rarely reported as underlying cause<br><br>Pneumonia was most common cause of death in | Not available | Epilepsy (active seizures)                           |

1  
2  
3  
4  
5  
6  
7  
8  
9  
10  
11  
12  
13  
14  
15  
16  
17  
18  
19  
20  
21  
22  
23  
24  
25  
26  
27  
28  
29  
30  
31  
32  
33  
34  
35  
36  
37  
38  
39  
40  
41  
42  
43  
44  
45  
46

|                                  |                                                                                                                                                                                                                                          |                                                                                                                                                   |               |                                                                                                                                                                                                                                                                                                                                                                                                                                                                                                                                            |               |               |
|----------------------------------|------------------------------------------------------------------------------------------------------------------------------------------------------------------------------------------------------------------------------------------|---------------------------------------------------------------------------------------------------------------------------------------------------|---------------|--------------------------------------------------------------------------------------------------------------------------------------------------------------------------------------------------------------------------------------------------------------------------------------------------------------------------------------------------------------------------------------------------------------------------------------------------------------------------------------------------------------------------------------------|---------------|---------------|
|                                  | <p><b>SMR 2.0 (95% CI 1.7, 2.3)</b><br/>Males 1.6 (95% CI 1.2, 2.0),<br/>Females 2.6 (95% CI 2.0, 3.3)<br/><i>Additional: SMRs for severity of ID, epilepsy and cerebral palsy are available in appendix</i></p>                         | <p><b>SMR 3.3 (95% CI 2.0, 5.5)</b><br/><br/>(adjusted for age and sex)</p>                                                                       |               | <p>people with both epilepsy and ID</p>                                                                                                                                                                                                                                                                                                                                                                                                                                                                                                    |               |               |
| Glover et al (2017) <sup>8</sup> | <p>N=664 deaths for people with ID (all ages) over 59,279.7 person-years<br/>Crude rate 11.2 (10.4, 12.1) per 1000 person-years<br/><b>SMR 3.18 (2.94, 3.43)</b><br/><b>Women 3.40 (3.02, 3.81)</b><br/><b>Men 3.03 (2.73, 3.35)</b></p> | <p>N=114 deaths from respiratory causes for people with ID vs 23.3 expected<br/><b>SMR 4.9 (4.0, 5.9)</b><br/><br/>(adjusted for age and sex)</p> | Not available | <p>N=57 / 114 (50%) of respiratory deaths (and 8.6% of all deaths) were from influenza and pneumonia, vs expected 7.4 deaths<br/><b>SMR 7.7 (5.8, 9.9)</b><br/>Vast majority of pneumonia were unspecified (organism) n=24 / 114 (21%) respiratory deaths (3.6% of all deaths) were due to pneumonitis due to solids / liquids vs expected 1.1 deaths<br/><b>SMR 21.8 (13.9, 32.4)</b></p> <p>N=12 (1.8%) of all deaths were due to respiratory and intrathoracic cancers vs expected 16.6 deaths<br/><b>SMR 0.7, 95% CI 0.4–1.3).</b></p> | Not available | Not available |



1  
2  
3  
4  
5  
6  
7  
8  
9  
10  
11  
12  
13  
14  
15  
16  
17  
18  
19  
20  
21  
22  
23  
24  
25  
26  
27  
28  
29  
30  
31  
32  
33  
34  
35  
36  
37  
38  
39  
40  
41  
42  
43  
44  
45  
46

For peer review only

|                                    |                                                                                                                                                                                                                                                                      |                                                                                                              |               |                                                                                                                                                                                                                                                                                                          |               |                                       |
|------------------------------------|----------------------------------------------------------------------------------------------------------------------------------------------------------------------------------------------------------------------------------------------------------------------|--------------------------------------------------------------------------------------------------------------|---------------|----------------------------------------------------------------------------------------------------------------------------------------------------------------------------------------------------------------------------------------------------------------------------------------------------------|---------------|---------------------------------------|
| Heslop et al (2014) <sup>6</sup>   | N= 247 deaths in people with ID aged 4+<br>Rate of death 16.2 per 1000 person years<br>Median age of death: 64 (52, 75).<br><i>Additional; all-cause mortality for sex, ID severity, amenable mortality, patient care, &amp; accommodation available in appendix</i> | n=37 (15%) deaths had underlying cause due to respiratory diseases, vs 14.0% England & Wales deaths (p=0.66) | Not available | Not available                                                                                                                                                                                                                                                                                            | Not available | Reduced smoking in ID group<br>p=0.02 |
| Hollins et al (1998) <sup>11</sup> | 270/2,026 (13.3%) deaths<br>116/1,081 (10.7%) deaths on Wandsworth register<br>154/945 (16.3%) deaths on Kensington register                                                                                                                                         | Not available                                                                                                | Not available | Bronchopneumonia: N=56 (48%) (Wandsworth)<br>N=69 (45%) (Kensington)<br>COPD Emphysema:<br>N=1 (Wandsworth)<br>N=1 (Kensington)<br>Asphyxia:<br>N=4 (Wandsworth)<br>N=1 (Kensington)<br>Respiratory other:<br>N=4 (Wandsworth)<br>N=4 (Kensington)<br><br>52% of all deaths had a diagnosis of pneumonia | Not available | Not available                         |

1  
2

|                                       |                                                                   |                                                                                                                                           |                                                                                                                                                                                                                                                                                                                                                                                                                                                                                                                                                                                                                                                   |                                                                                                                                                                                                                                                          |                                                                                                                 |               |
|---------------------------------------|-------------------------------------------------------------------|-------------------------------------------------------------------------------------------------------------------------------------------|---------------------------------------------------------------------------------------------------------------------------------------------------------------------------------------------------------------------------------------------------------------------------------------------------------------------------------------------------------------------------------------------------------------------------------------------------------------------------------------------------------------------------------------------------------------------------------------------------------------------------------------------------|----------------------------------------------------------------------------------------------------------------------------------------------------------------------------------------------------------------------------------------------------------|-----------------------------------------------------------------------------------------------------------------|---------------|
| 3 Hosking et al (2016) <sup>24</sup>  | 656/ 16666 (3.9%) deaths<br><b>HR = 3.62 (95% CI; 3.33, 3.93)</b> | 123/ 16666 (18.8%, rate= 24.8) deaths<br><b>HR = 6.68 (95% CI; 5.38, 8.29)</b><br><br><b>(adjusted for age, sex and general practice)</b> | Down syndrome = 24/ 1793 (20.3%) deaths.<br>General population: 135/ 113562 (rate= 3.9) deaths.                                                                                                                                                                                                                                                                                                                                                                                                                                                                                                                                                   | Pneumonia; n = 67/ 16666 (rate = 13.5)<br>Aspiration pneumonitis; n = 21/ 16666 (rate = 4.2)                                                                                                                                                             | General population:<br>Pneumonia; 39/ 113562 (rate = 1.1)<br>Aspiration pneumonitis; n = 6/ 113562 (rate = 0.2) | Not available |
| 14 Janicki et al (1999) <sup>22</sup> | 2,752 deaths in the group aged 40+/4,183 all-age deaths (66%)     | 40+ year olds: N=548 (20%), rate: 201 per 100,000                                                                                         | Increasing by age decade:<br>aged 40s: 343 per 100,000 (16% of those who died)<br>aged 50s: 793 per 100,000 (20%)<br>aged 60s 1660 per 100,000 (25%)<br>aged 70+: 3441 per 100,000<br>Males with ID rate of death: 257 per 100,000<br>Females with ID rate of death: 331 per 100,000<br>Respiratory causes did not vary over the 10-year study period. Deaths due to respiratory diseases increased, with increasing age.<br>Gender: breathing obstructions were more prevalent among males.<br>Gender x age: respiratory disease was increased in the oldest groups, for males particularly while respiratory disease remained static as a cause | Breathing obstructions – 2.7% average deaths per year across 10 years, N=75, rate=27.5 per 100,000<br>Respiratory disease types: pneumonia was the most prevalent type of respiratory cause of death, with 43% of respiratory disease deaths in ID group | Not available                                                                                                   | Age, gender   |

41  
42  
43  
44  
45  
46

1  
2  
3  
4  
5  
6  
7  
8  
9  
10  
11  
12  
13  
14  
15  
16  
17  
18  
19  
20  
21  
22  
23  
24  
25  
26  
27  
28  
29  
30  
31  
32  
33  
34  
35  
36  
37  
38  
39  
40  
41  
42  
43  
44  
45  
46

|                                    |                                              |                                                                                                                                                                                 |                                                                                                                                                                                                                                                               |                                                                                                                                                                                                                                                                                                                                                                                                                                     |               |               |
|------------------------------------|----------------------------------------------|---------------------------------------------------------------------------------------------------------------------------------------------------------------------------------|---------------------------------------------------------------------------------------------------------------------------------------------------------------------------------------------------------------------------------------------------------------|-------------------------------------------------------------------------------------------------------------------------------------------------------------------------------------------------------------------------------------------------------------------------------------------------------------------------------------------------------------------------------------------------------------------------------------|---------------|---------------|
|                                    |                                              |                                                                                                                                                                                 | of death for females across ages.                                                                                                                                                                                                                             |                                                                                                                                                                                                                                                                                                                                                                                                                                     |               |               |
| Ng et al. (2017) <sup>12</sup>     | 4,738/15,289 deaths in people aged 55+ (31%) | 807/4,738 (17%) respiratory deaths for those with ID<br><b>HR =12.5 (10.9, 14.2)</b><br><br><b>(adjusted for sex, year of birth and year of access to services)</b>             | ID rate: 423 per 100,000<br>DS rate: 3,187 per 1,000                                                                                                                                                                                                          | ID group (excludes DS)<br>Pneumonitis due to solids and liquids: 10%, rate 25 per 100,000<br>Pneumonia: 50%, rate 129 per 100,000<br>Other chronic obstructive pulmonary disease: 20%, 49 per 100,000<br>DS group<br>Pneumonitis due to solids and liquids 31.4%, 181 per 100,000<br>Pneumonia 20%, 113 per 100,000<br>Asthma 8%, 45 per 100,000<br>Bronchitis 8%, 45 per 100,000<br>Other respiratory disorders 8%, 45 per 100,000 | Not available | Not available |
| Oppewal et al (2018) <sup>27</sup> | 207/1050 ID=19.7%; 54/ 149 DS=26.1%          | 69/159 ID=44.3%; 33/45 DS only=73.3%; 36/114 ID with no DS=31.6%<br><br>Respiratory causes were the top primary causes of ID deaths.<br>Respiratory causes were the top primary | 5-year age bands:<br>50-54 ID=100% GP=3.3%; 55-59 ID=26.5% GP=4.7%; 60-64 ID=51.4% GP=6.0%; 65-69 ID=30.4% GP=6.7%; 70-74 ID=23.8% GP=8.6%; 75-79 ID=12.5% GP=9.4%; 80-84 ID=26.3% GP=9.4%; 85-90 ID=(0) GP=9.9%; 90-95 ID=40% GP=10.4%; 95+ ID=100% GP=10.9% | Pneumonia ID=80.4%; Chronic obstructive pulmonary diseases ID=17.6%                                                                                                                                                                                                                                                                                                                                                                 | Not available | Not available |

1  
2  
3  
4  
5  
6  
7  
8  
9  
10  
11  
12  
13  
14  
15  
16  
17  
18  
19  
20  
21  
22  
23  
24  
25  
26  
27  
28  
29  
30  
31  
32  
33  
34  
35  
36  
37  
38  
39  
40  
41  
42  
43  
44  
45  
46

|                                      |                      |                                                                                                                                                                                                                           |                                                                                                                                                                                                                                                                                                                                                                    |                                                                                            |                                                                                                                                                                                                                                                                                                                                                        |                                                               |
|--------------------------------------|----------------------|---------------------------------------------------------------------------------------------------------------------------------------------------------------------------------------------------------------------------|--------------------------------------------------------------------------------------------------------------------------------------------------------------------------------------------------------------------------------------------------------------------------------------------------------------------------------------------------------------------|--------------------------------------------------------------------------------------------|--------------------------------------------------------------------------------------------------------------------------------------------------------------------------------------------------------------------------------------------------------------------------------------------------------------------------------------------------------|---------------------------------------------------------------|
|                                      |                      | cause of DS deaths. General 50+ population, the three largest groups of primary causes of death were neoplasms (31%), circulatory diseases (28%) and respiratory diseases (9%). No SMR available.                         |                                                                                                                                                                                                                                                                                                                                                                    |                                                                                            |                                                                                                                                                                                                                                                                                                                                                        |                                                               |
| Patja et al (2001) <sup>14</sup>     | 1111/ 2369 ID =46.9% | <p>Immediate cause 322/1093 ID=29%;</p> <p>Primary cause 241/1095 ID=22%</p> <p>Respiratory diseases second largest cause of ID death</p> <p><b>SMR=3.76 (CI 3.31 to 4.27)*</b><br/><b>(adjusted for age and sex)</b></p> | <p>Male:<br/>age 2-19 <b>SMR=5.8 (4.4 – 15.6)</b>;<br/>age 20-39 <b>SMR=5.4 (2.9 – 8.0)</b>;<br/>age 40-59 <b>SMR=5.5 (3.5-7.5)</b>;<br/>age 60+ <b>SMR=2.7 (2.7 – 4.8)</b></p> <p>Female:<br/>age 2-19 <b>SMR=4.3 (0.3 – 4.7)</b>;<br/>age 20-39 <b>SMR=3.2 (1.1 – 5.1)</b>;<br/>age 40-59 <b>SMR=6.2 (4.1 – 8.2)</b>;<br/>age 60+ <b>SMR=3.3 (1.7 – 3.0)</b></p> | Pneumonia ID=83%;<br>Chronic obstructive pulmonary disease ID=11%.                         | <p>Pneumonia deaths (%):<br/>Profound ID=29%;<br/>Severe ID=13%;<br/>Moderate ID=33%;<br/>Mild ID=25%.</p> <p>Risk ratios compared to general population:<br/>Mild ID 2.6 times higher;<br/>Profound ID 5.8 times higher.<br/>ID men higher risk than women in younger age groups (&lt; 39 years), but at lower risk from 60 years of age onwards.</p> | Age, gender (all respiratory)<br>ID severity (with pneumonia) |
| Raitauso et gal (1997) <sup>13</sup> | 216 deaths           | Immediate cause of death 97/216 ID=45%                                                                                                                                                                                    | age 0-14 SMR=0.48;<br>age 15-44 SMR=3.46;<br>age 45-74 SMR=2.35;<br>age 75 SMR=0                                                                                                                                                                                                                                                                                   | Bronchopneumonia (immediate cause) ID=43%<br>Five patients had died of pneumonia caused by | Not available                                                                                                                                                                                                                                                                                                                                          | Age (all respiratory)                                         |

1  
2  
3  
4  
5  
6  
7  
8  
9  
10  
11  
12  
13  
14  
15  
16  
17  
18  
19  
20  
21  
22  
23  
24  
25  
26  
27  
28  
29  
30  
31  
32  
33  
34  
35  
36  
37  
38  
39  
40  
41  
42  
43  
44  
45  
46

For peer review only

|                                    |                                                                           |                                                                                                                                                                                                                                                  |                                                                                                                                                                                            |                                                                                                                                                                                                                                                                                                                                                          |                                                                                                  |               |
|------------------------------------|---------------------------------------------------------------------------|--------------------------------------------------------------------------------------------------------------------------------------------------------------------------------------------------------------------------------------------------|--------------------------------------------------------------------------------------------------------------------------------------------------------------------------------------------|----------------------------------------------------------------------------------------------------------------------------------------------------------------------------------------------------------------------------------------------------------------------------------------------------------------------------------------------------------|--------------------------------------------------------------------------------------------------|---------------|
|                                    |                                                                           | <p>Primary cause<br/>14/216 ID= 6%.</p> <p>Respiratory diseases were the dominant causes of ID death.</p> <p><b>SMR=2.15 (CI 1.18 – 3.61)</b></p> <p><b>(adjusted for age, and year of death)</b></p>                                            |                                                                                                                                                                                            | <p>aspiration. In one case fatal pneumonia had been caused by a fistula between the bronchus and the pleura. Besides pneumonia, two patients had acute laryngitis and one patient had hyperplasia of the lymph nodes of the lungs as the immediate cause of death. The latter had trisomy of chromosome 13 (Patau’s syndrome) as the basic disorder.</p> |                                                                                                  |               |
| Smith et al (2020) <sup>10</sup>   | <p>N = 106 (0.6%) deaths</p> <p><b>SMR = 11.6 (95% CI; 9.6, 14.0)</b></p> | <p>Underlying cause of death: N = 8/ 106 (8%) deaths</p> <p>All-contributing factors in death: <b>n = 55. CMR = 81.7 (95% CI; 62.7, 106.4) deaths</b></p> <p><b>SMR = 55.3 (95% CI; 42.5, 72.1)</b></p> <p><b>(adjusted for age and sex)</b></p> | <p>Underlying cause of death: General population: 17/ 458 (4%) deaths</p> <p>All-contributing factors in death: General population: n = 51. <b>CMR = 1.4 (95% CI; 1.1, 1.8) deaths</b></p> | <p>Underlying cause of death: Pneumonia including influenza; &lt;5/ 106</p> <p>All-contributing factors in death: Pneumonia= 27/ 106 (25.5%) deaths</p> <p>Respiratory failure; 17/ 106 (16.0%) deaths</p> <p>Respiratory disorders = 15/ 106 (14.2%) deaths</p> <p>Pneumonitis associated with food and vomit = 9/ 106 (8.5%) deaths</p>                | <p>General populations: All-contributing factors in death: Pneumonia = 21/ 458 (4.6%) deaths</p> | Not available |
| Trollor et al (2017) <sup>25</sup> | <p>732 / 19362 ID=4%</p> <p><b>SMR=1.3 (1.2 to 1.5)</b></p>               | <p>632/732 ID=86.3% had cause of death information</p> <p>78 ID=12% 4<sup>th</sup> top cause using the ID ABI conversion</p>                                                                                                                     | Not available                                                                                                                                                                              | Not available                                                                                                                                                                                                                                                                                                                                            | Not available                                                                                    | Not available |

|    |                                        |                                                           |                                                         |               |                                                                                                                              |                                                                                                            |        |
|----|----------------------------------------|-----------------------------------------------------------|---------------------------------------------------------|---------------|------------------------------------------------------------------------------------------------------------------------------|------------------------------------------------------------------------------------------------------------|--------|
| 1  |                                        |                                                           |                                                         |               |                                                                                                                              |                                                                                                            |        |
| 2  |                                        |                                                           |                                                         |               |                                                                                                                              |                                                                                                            |        |
| 3  |                                        | 130 ID=20% 1st top using the ID revised version           |                                                         |               |                                                                                                                              |                                                                                                            |        |
| 4  |                                        | 16 ID=3% of respiratory deaths were considered avoidable. |                                                         |               |                                                                                                                              |                                                                                                            |        |
| 5  |                                        | 26242 GP=9% 3rd top underling cause                       |                                                         |               |                                                                                                                              |                                                                                                            |        |
| 6  |                                        |                                                           |                                                         |               |                                                                                                                              |                                                                                                            |        |
| 7  |                                        |                                                           |                                                         |               |                                                                                                                              |                                                                                                            |        |
| 8  |                                        |                                                           |                                                         |               |                                                                                                                              |                                                                                                            |        |
| 9  |                                        |                                                           |                                                         |               |                                                                                                                              |                                                                                                            |        |
| 10 |                                        |                                                           |                                                         |               |                                                                                                                              |                                                                                                            |        |
| 11 |                                        |                                                           |                                                         |               |                                                                                                                              |                                                                                                            |        |
| 12 |                                        |                                                           |                                                         |               |                                                                                                                              |                                                                                                            |        |
| 13 |                                        |                                                           |                                                         |               |                                                                                                                              |                                                                                                            |        |
| 14 |                                        |                                                           |                                                         |               |                                                                                                                              |                                                                                                            |        |
| 15 |                                        |                                                           |                                                         |               |                                                                                                                              |                                                                                                            |        |
| 16 |                                        |                                                           |                                                         |               |                                                                                                                              |                                                                                                            |        |
| 17 | Tyrer & McGrother (2009) <sup>23</sup> | 503/ 2995 (17%) deaths<br>SMR=2.77 (95% CI 2.53, 3.03).   | SMR=5.46 (95% CI 4.58, 6.46) (adjusted for age and sex) | Not available | Bronchopneumonia; SMR=6.47 (95% CI 5.00 8.23), O=66, E=10.2.<br>Other respiratory; SMR=4.64 (CI 3.58 to 5.91). O=65, E=14.0. | Male; SMR=2.28 (95% CI; 2.02-2.56) O=278, E=121.8.<br>Female; SMR=3.24 (95% CI; 2.83-3.69). O=225, E=69.4. | Gender |
| 18 |                                        |                                                           |                                                         |               |                                                                                                                              |                                                                                                            |        |
| 19 |                                        |                                                           |                                                         |               |                                                                                                                              |                                                                                                            |        |
| 20 |                                        |                                                           |                                                         |               |                                                                                                                              |                                                                                                            |        |
| 21 |                                        |                                                           |                                                         |               |                                                                                                                              |                                                                                                            |        |
| 22 |                                        |                                                           |                                                         |               |                                                                                                                              |                                                                                                            |        |

\*only where adjusted specifically for respiratory mortality

SMR=standardised mortality ratio/ CI=confidence interval/ RR=rate ratio/ HR=hazard ratio/CMF=comparative mortality figure/ OR=odds ratio/ O=observed deaths/ E=expected death\* calculated by authors using data from the study

## Study characteristics

Key features of all studies identified for inclusion in the review were tabulated (Table 1). These were cohort studies (n=12), case control studies (n=4) and one population-based audit of deaths in adults and children. These studies report data on 90,302 people with intellectual disabilities and 27,394 deaths. The average study size was 9,250 people. These studies were from the Netherlands (n = 1), Finland (n = 2), Australia (n = 3), the United Kingdom (n = 7), the United States of America (n = 1), Sweden (n = 2) and Denmark (n = 1).

## Definition of respiratory disorder

Thirteen out of 17 (76%) studies defined the respiratory disorder using ICD 9 -chapter codes[13-15,22,23] and ICD 10 – chapter codes for respiratory disorders.[8,10,12,23-26] The remaining four studies included in the systematic review did not define respiratory disorders.

## Causes of death from respiratory disorders

Thirteen papers reported on cause of deaths from respiratory disorders.[8,10-15,22-24,26-28] Pneumonia was reported as a cause of death in 12 studies.[8,10-15,22,23,26,27], five studies reported deaths from pneumonitis related to aspiration[8,10,12,14,24], five studies reported on chronic obstructive pulmonary disease (COPD)[11,12,14,26,27], one study reported on asthma<sup>31</sup> and one reported respiratory cancer deaths.[8]

## Evidence synthesis

### Respiratory-associated mortality

Five papers reported that respiratory disorders were the dominant cause of death in people with intellectual disabilities.[11,13,27,28,29] A further three studies found that deaths from respiratory disorders were the second most common cause of death.[12,14,24] Respiratory-associated deaths were in the top five main causes of deaths for a further four papers.[9,10,22,25] Comparative results (intellectual disabilities vs general population) for deaths due to respiratory disorders were reported in 10/17 (59%) of the studies.[5,8-10,12,22,24-26] In the majority of these studies rates of death from respiratory disorders were higher for people with intellectual disabilities than for people in the general population. However, Troller et al. (2017)[25] reported that respiratory-associated deaths in the general population were (9%) similar to the population with intellectual disabilities (12%). Hollins et al. (1998)[11] also reported that respiratory disorders were the most commonly cited cause of death for both groups.

### **Individual respiratory disorders and mortality**

Pneumonia was reported as the most common cause of respiratory death in people with intellectual disabilities.[8,10-15,22-24,26,27] Contributors to pneumonia deaths included influenza and injury from inhalation and aspiration events.[10,14] Pneumonitis featured as an underlying or contributing cause for between eight and 21% of respiratory-associated deaths in people with intellectual disabilities.[8,10,12] Crude comparison data showed people with intellectual disabilities were much more likely (between 10 and 20 times) to die from pneumonitis.[24,26] COPD was found to be a common cause of death in two studies focussing on older adults.[12,27]

### **Factors associated with respiratory-associated deaths experienced by people with intellectual disabilities**

Age, gender and severity of intellectual disability have been found to be associated with risk of respiratory cause of death. Only four out of 17 (23.5%) papers directly reported on factors associated with the risk of respiratory-associated deaths[14,22,23,29] (see Table 2). Two reported SMRs separately for males and females[14,23], while two reported proportions of respiratory deaths between males and females. None directly compared males versus females or reported tests of significance. While one study reported higher respiratory SMRs among females[23], another study reported separate SMRs for different age-bands which varied widely[14]. Group-level analysis was not possible. Level of intellectual disabilities was only reported as associated with respiratory related deaths in one study with 35 year follow up using relative risk but failed to report confidence or p-values.[14] This study found that, when compared to the general population, the relative risk of respiratory related deaths was 2.6 times higher for people with mild intellectual disabilities and 5.8 times higher for people with profound and multiple intellectual disabilities.

### **Respiratory mortality among children and young people**

Respiratory deaths amongst children and young people with intellectual disabilities were reported in five studies and found to be a common cause of death across all studies.[10,13,15,29,30] Four studies included comparison with the general population for respiratory causes of death, while one included the national population without intellectual disabilities[10]. All analyses were limited by the small numbers of death. Raitasuo et al. (1997) reported only one death.[13] Patja et al. (2001) reported higher SMR for males aged 2-19 years



1  
2 but not females.[30] Smith et al. reported 8% deaths had respiratory disease as the underlying  
3 cause but the SMR for underlying cause was not reported.[10]  
4

### 5 **Meta-analytical outcomes**

6  
7 Ten studies[8,10-15,23,24,28] reported the necessary data to calculate (SMR, hazard ratio, or  
8 data necessary to calculate these) and were included in the meta-analysis of respiratory  
9 mortality of people with intellectual disabilities and the general population. As Hollins (1998)  
10 reported the SMR of two separate cohorts, these are displayed separately in the relevant forest  
11 plots.[11] The pooled SMRs for respiratory mortality between people with intellectual  
12 disabilities and the general population was 10.86 (95% CI 5.32, 22.18). The results indicate  
13 that respiratory mortality occurs ten times more frequently in the intellectual disabilities group  
14 than in the general population group. At the individual study level, this was adjusted for age in  
15 all studies and for sex in all studies except for two of these studies[11,13], where this was not  
16 clear. There was evidence of considerable statistical heterogeneity between studies in the meta-  
17 analyses, with  $I^2=99.0\%$ . Results are displayed in Figure 2.  
18  
19  
20  
21  
22  
23  
24  
25  
26  
27

### 28 **Insert Figure 2: Forest plot of respiratory associated mortality**

29  
30  
31 As five studies (12, 15, 23, 24, 28) focussed on adults only, one study (10) focussed on children  
32 only, and six (8, 11-15) included people of all ages, a sub-analysis was conducted of studies  
33 which reported data on an adult only population. The results of this sub-analysis are displayed  
34 in Figure 3. The pooled SMR reduced slightly from 10.86 (95% CI 5.32,22.18) to 6.53 (95%  
35 CI 4.29,9.96), after one study with a sample of primarily children was excluded.[10] Studies  
36 which included both adults and children in their sample[8,11-15] were next removed one at a  
37 time. First, both cohorts from Hollins (1998) were removed and the pooled SMR was reduced  
38 by around half, from 9.15 to 4.80[11]. The further removal of studies by Glover (2017)[8],  
39 Patja (2001)[14] and Raitasuo (1997)[13] resulted in a final pooled SMR for adults of 5.85  
40 (95% CI 4.73,7.22,  $p<0.001$ ). Heterogeneity between studies was also reduced from  $I^2=99\%$   
41 to  $I^2=56\%$  by the exclusion of samples which included children.  
42  
43  
44  
45  
46  
47  
48  
49  
50  
51

### 52 **Insert figure 3: Forest plot for adults only**

53  
54  
55 A sub-analysis was conducted of studies which reported an SMR for pneumonia.[8,11,23] The  
56 pooled SMR for pneumonia mortality for people with intellectual disabilities compared to the  
57 general population was 26.65 (95% CI 5.63, 126.24,  $p<0.001$ ). These results, displayed in  
58  
59  
60

1  
2  
3  
4  
5  
6  
7  
8  
9  
10  
11  
12  
13  
14  
15  
16  
17  
18  
19  
20  
21  
22  
23  
24  
25  
26  
27  
28  
29  
30  
31  
32  
33  
34  
35  
36  
37  
38  
39  
40  
41  
42  
43  
44  
45  
46  
47  
48  
49  
50  
51  
52  
53  
54  
55  
56  
57  
58  
59  
60

Figure 4, indicate that pneumonia related mortality occurs much more frequently in people with intellectual disabilities than in the general population group. Evidence of considerable statistical heterogeneity between studies was also present in this sub-analysis with  $I^2= 99.0\%$ . SMRs were recalculated excluding the only study to include an adult only sample, Tyrer & McGrother (2009)[23] resulting in a substantial increase in pooled SMR (95% CI from 26.65 to 42.70).

#### **Insert figure 4: Forest plot for pneumonia related mortality**

#### **Sensitivity analysis**

Sensitivity analysis in relation to quality assessment was run for the ten studies included in the meta-analysis (Appendix 3). Studies which were rated as weak[13] or moderate[23] were removed from the analysis. The pooled SMR for mortality ratios changed slightly as Raitasuo (1997)[13] (from 10.81 to 12.67)[27] and then Tyrer and McGrother (2009) (from 12.67 to 13.94)[23] were removed from the analysis. As the change in SMR was small, this suggests that inclusion of weaker studies did not significantly change the results.

#### **Discussion**

This systematic review and meta-analysis highlights that people with intellectual disabilities experience excess respiratory-associated deaths, with a respiratory mortality ten times greater than for the general population. Respiratory mortality was more prevalent among studies which include children, and pneumonia was a major contributor to the higher respiratory mortality reported in this study. Clinical guidelines have contributed to a reduction in mortality from community-acquired pneumonia.[31] We believe the evidence presented here highlights the need for clinical guideline development groups to make recommendations on reducing the risks of premature death due to community-acquired pneumonia amongst people with intellectual disabilities. Vaccination programmes for influenza can help to reduce respiratory mortality in children[32] and adults.[33] Although there is a relatively low uptake of influenza vaccine amongst people with intellectual disabilities, annual health-checks for people with intellectual disabilities have been reported to increase uptake of influenza immunisation.[34] People with intellectual disabilities should be identified as a high-risk group and immunisation providers should prioritise the improvement of vaccine uptake, for example through the roll-out of health checks. People with intellectual disabilities are at increased risk of recurrent chest infections which are secondary to dysphagia[35,36] with a high proportion of aspiration pneumonia-related deaths occurring among individuals with severe and profound intellectual

1  
2 disabilities.[5,22,35,37,38] Increased recognition of the link between dysphagia and respiratory  
3 disorders among caregivers and practitioners is critical to ensuring the early identification of  
4 individuals with respiratory disorders.  
5  
6  
7  
8

9 The higher risk of death from respiratory disorders, such as pneumonia, for people with  
10 intellectual disabilities is a significant concern in relation to the rapidly developing COVID-19  
11 pandemic[39,40]. Urgent action to disaggregate data on deaths from COVID-19 for people  
12 with intellectual disabilities and to investigate factors associated with COVID-19 related  
13 mortality for people with intellectual disabilities is vital to ensure that clinical guidelines are  
14 based on consideration of the specific risks faced by people with intellectual disabilities.  
15 Research is urgently required to investigate the risk factors associated with COVID-19 for  
16 people with intellectual disabilities to ensure carers and clinicians have access to the best  
17 evidence to reduce the risk of infection in those most vulnerable and to inform the clinical  
18 management of those who contract COVID-19. Carers and clinical staff must be given training  
19 to ensure they understand the human rights and health care needs of people with intellectual  
20 disabilities to ensure that existing stark disparities in the health of people with intellectual  
21 disabilities are not widened during this crisis.  
22  
23  
24  
25  
26  
27  
28  
29  
30  
31  
32

33 Interventions should focus on the pediatric age group. Among the studies included in this meta-  
34 analysis we found a relationship between inclusion of children and SMRs from respiratory  
35 causes, with those studies including children reporting higher SMRs. This is consistent with  
36 studies that have reported higher SMRs in children compared with adults in epilepsy[15] and  
37 cerebral palsy.[41] Overall, mortality in childhood is very low relative to adulthood, and in the  
38 pediatric age group chronic disabling conditions such as intellectual disability, epilepsy and  
39 cerebral palsy all have a marked impact on SMR. Co-morbidity with epilepsy and cerebral palsy  
40 are likely to be significant modifiers of the relationship between intellectual disability and  
41 respiratory mortality. Children with more severe intellectual disability are more likely to have  
42 epilepsy and cerebral palsy, both of which are independent risk factors for respiratory mortality.  
43  
44  
45  
46  
47  
48  
49  
50  
51

### 52 **Study strengths and limitations**

53 Our study has several strengths. The meta-analysis included mortality ratios from ten  
54 observational studies covering 1,844 respiratory deaths in people with intellectual disabilities,  
55 which has improved the power and precision to answer this important research question. A  
56 rigorous and systematic analysis process was undertaken, and we minimised the risk of bias,  
57  
58  
59  
60

1  
2 errors and omissions by having two or more reviewers conduct comprehensive searches, assess  
3 study quality and extract descriptive data. Due to the low prevalence (~1%) of intellectual  
4 disabilities among the general population, low sample size was a considerable limitation,  
5 relative to other patient groups. However, our meta-analysis included two national [10,12], and  
6 five regional intellectual populations in their respective countries [11,15,23,28]. While  
7 heterogeneity was found, due to methodological and clinical diversity including study design,  
8 age and study nationality, this is common in meta-analyses and statistical heterogeneity was  
9 inevitable.[20] We have not included assessment of non-reporting or publication bias. Most of  
10 the research was conducted in Western countries, thus limiting the extent to which the findings  
11 may generalise to non-Western countries. Furthermore, ethnicity was not reported widely which  
12 prevented further analysis. There was variation among studies on how mortality was examined  
13 and how deaths were reported. There is a general lack of evidence on factors associated with  
14 the increased risk of respiratory related deaths in people with intellectual disabilities. As a  
15 consequence, we were not able to perform meta-regression on predictors or factors reported in  
16 studies which increase SMRs for respiratory deaths (age, sex, place of death, or severity of  
17 intellectual disabilities). This should be a priority for future research in order to inform the  
18 development of targeted interventions to prevent respiratory related deaths. Although the meta-  
19 analysis enables synthesis of data from a large sample, many of the individual studies reported  
20 on small samples and are at increased risk of bias. It is encouraging that there have been several  
21 larger studies in recent years and future research should focus on reporting respiratory mortality  
22 in representative, population-based samples. Furthermore, the majority of the studies included  
23 for review relied on death certificate data. One the most reported causes on the death certificate  
24 of people with intellectual disabilities is the intellectual disability itself. Given that this problem  
25 only exists within this population, true causes of death remain under-estimated.[42,43] As  
26 reporting has improved over the years, and many counties implemented automated coding  
27 systems, it is likely that older paper have more bias than more recent studies.

28  
29  
30  
31  
32  
33  
34  
35  
36  
37  
38  
39  
40  
41  
42  
43  
44  
45  
46  
47  
48  
49 These findings signify the urgent need to develop and implement evidence-informed strategies  
50 to reduce premature mortality among people with intellectual disabilities. Respiratory disorders  
51 are a major cause of death for people with intellectual disabilities, many of which are avoidable  
52 with improved public health initiatives and access to good quality health and social care.  
53 However, further research is required to understand both the multifactorial causes of this  
54 heightened risk as well as the most effective approaches for the multi-professional clinical  
55 management of these risks.  
56  
57  
58  
59  
60

1  
2  
3  
4 **Contributors:** MT, CM, AM, ER, LHM, DK, KD, GSS, AH & FB had full access to all the  
5 data, contributed to the systematic review and meta-analysis of studies, interpretation of  
6 results and the manuscript. JS and BJ helped interpret the result of the study and contributed  
7 to the manuscript. MT is study guarantor. All authors reviewed the final manuscript and  
8 agreed to be accountable for all aspects of the work and approved the final manuscript for  
9 submission. The corresponding author attests that all listed authors meet the authorship  
10 criteria and that no others meeting the criteria have been omitted.  
11  
12  
13  
14  
15  
16

17  
18 **Funding** This work was supported by The Scottish Government grant number (HSCD  
19 169698)  
20  
21  
22

23 **Competing interests** None declared.  
24  
25

26 **Patient consent for publication** Not required  
27  
28

29  
30 **Ethics** Not required as this systematic review and meta-analysis was based on published data  
31  
32

33 **Provenance and peer review:** Not commissioned; externally peer reviewed  
34  
35

36  
37 **Data availability statement:** All data relevant to the study are included in the article or  
38 uploaded as supplementary information.  
39  
40

#### 41 **ORCID IDs**

42 Maria Truesdale 0000-0003-3081-7858  
43 Craig Melville 0000-0001-7234-2382  
44 Kirsty Dunn 0000-0003-1701-2190  
45 Angela Henderson 0000-0002-6146-3477  
46 Laura Hughes-McCormack 0000-0001-9498-8045  
47 Arlene McGarty 0000-0003-4937-0574  
48 Ewelina Rydzewska 0000-0002-9749-3133  
49 Gillian Smith 0000-0001-7241-695  
50 Joseph Symonds 0000-0002-2141-4216  
51 Bhautesh Jani 0000-0001-7348-514x  
52 Deborah Kinnear 0000-0002-2626-1554  
53  
54  
55  
56  
57  
58  
59  
60

## Figure captions

Figure 1: PRISMA flow diagram of systematic search and selection. A total of 2286 records were retrieved through a search of Embase, ISI Web of Science (all databases), CINAHL, and PsycINFO with an additional 9 records identified through other sources. After removing 241 duplicates, 2025 records were excluded due to ineligible types., the remaining 29 were retrieved as full-texts. From these 17 were included in the narrative review and 10 included in the meta-analysis.

Figure 2: Forest plot of respiratory associated mortality. The pooled SMRs for respiratory mortality between people with intellectual disabilities and the general population was 10·86 (95% CI 5·32, 22·18). There was considerable statistical heterogeneity between studies in the meta-analyses, with  $I^2=99\cdot0\%$ .

Figure 3: Forest plot for adults only. The pooled SMR for adults only was 5·85 (95% CI 4·73,7·22,  $p<0\cdot001$ ). Heterogeneity between studies was also reduced from  $I^2=99\%$  to  $I^2=56\%$  by the exclusion of samples which included children.

Figure 4: Forest plot for pneumonia related mortality. The pooled SMR for pneumonia mortality for people with intellectual disabilities compared to the general population was 26·65 (95% CI 5·63, 126·24,  $p<0\cdot001$ ). Evidence of considerable statistical heterogeneity between studies was also present in this sub-analysis with  $I^2=99\cdot0\%$ .

## References

- 1 Harris JC. Intellectual disability: Understanding its development, causes, classification, evaluation, and treatment. Oxford: Oxford University Press, 2006.
- 2 Maulik PK, Mascarenhas MN, Mathers CD, Dua T, Saxena S. Prevalence of intellectual disability: a meta-analysis of population-based studies. *Res Dev Disabil* 2011; **32(2)**: 419-36
- 3 Organisation W. The ICD-10 classification of mental and behavioural disorders. Clinical descriptions and diagnostic guidelines. Geneva: World Health Organisation, 1992.
- 4 World Health Organization. World health statistics 2015. Geneva: World Health Organization, 2015.
- 5 Heslop P, Blair P, Fleming P, Hoghton M, Marriott A, Russ L. Confidential Inquiry into premature deaths of people with learning disabilities (CIPOLD) Final Report <http://www.bristol.ac.uk/cipold/fullfinalreport.pdf> (2013) (accessed June 25, 2020).
- 6 Heslop P, Blair PS, Fleming P, Hoghton M, Marriott A, Russ L. The Confidential Inquiry into premature deaths of people with intellectual disabilities in the UK: a population-based study. *Lancet* 2014; **383(9920)**: 889-95.
- 7 O'Leary L, Cooper SA, Hughes-McCormack L. Early death and causes of death of people with intellectual disabilities: a systematic review. *J Appl Res Intellect Disabil* 2018; **31(3)**: 325-42.
- 8 Glover G, Williams R, Heslop P, Oyinlola J, Grey J. Mortality in people with intellectual disabilities in England. *J Intellect Disabil Res* 2017; **61(1)**: 62-74.
- 9 Tyrer F, Smith LK, McGrother CW. Mortality in adults with moderate to profound intellectual disability: a population-based study. *J Intellect Disabil Res* 2007; **51(7)**: 520-7.
- 10 Smith GS, Fleming M, Kinnear D, Henderson A, Pell JP, Melville C, Cooper S-A. Rates and causes of mortality among children and young people with and without intellectual disabilities in Scotland: a record linkage cohort study of 796,190 schoolchildren. *BMJ Open* 2020 (Accepted for Publication) DOI:10.1136/bmjopen-2019-034077.
- 11 Hollins S, Attard MT, Fraunhofer Nv, McGuigan S, Sedgwick. Mortality in people with learning disability: risks, causes, and death certification findings in London. *Dev Med Child Neurol* 1998; **40(1)**: 50-6.
- 12 Ng N, Wallén EF, Ahlström G. Mortality patterns and risk among older men and women with intellectual disability: a Swedish national retrospective cohort study. *BMC Geriatr* 2017; **17(1)**: 269.

- 13 Raitasuo J, Mölsä P, Raitasuo S, Mattila K. Deaths among the intellectually disabled: A retrospective study. *J Appl Res Intellect Disabil* 1997; **10(4)**: 280-8.
- 14 Patja K, Mölsä P, Iivanainen M. Cause-specific mortality of people with intellectual disability in a population-based, 35-year follow-up study. *J Intellect Disabil Res* 2001; **45(1)**: 30-40.
- 15 Forsgren L, Edvinsson SO, Nyström L, Blomquist HK. Influence of epilepsy on mortality in mental retardation: an epidemiologic study. *Epilepsia* 1996; **37(10)**: 956-63.
- 16 Moher D, Liberati A, Tetzlaff J, Altman DG. Preferred reporting items for systematic reviews and meta-analyses: the PRISMA statement. *Int J Surg* 2010; **8(5)**: 336-41.
- 17 Kmet LM, Cook LS, Lee RC. Standard quality assessment criteria for evaluating primary research papers from a variety of fields. HTA Initiative #13. Edmonton: Alberta Heritage Foundation for Medical Research, 2004.
- 18 Shea BJ, Bouter LM, Peterson J, Boers M, Andersson N, Ortiz Z, et al. External validation of a measurement tool to assess systematic reviews (AMSTAR). *PLoS One* 2007; **2(12)**: e1350. DOI:10.1371/journal.pone.0001350.
- 19 Borenstein M, Higgins JP, Hedges LV, Rothstein HR. Basics of meta-analysis:  $I^2$  is not an absolute measure of heterogeneity. *Res Synth Methods* 2017; **8(1)**: 5-18.
- 20 Higgins JP, Thompson SG, Deeks JJ, Altman DG. Measuring inconsistency in meta-analyses. *BMJ* 2003; **327(7414)**: 557-60.
- 21 Borenstein M. Common mistakes in meta-analysis and how to avoid them. New Jersey: Biostat. Inc, 2019: 388.
- 22 Janicki MP, Dalton AJ, Henderson CM, Davidson PW. Mortality and morbidity among older adults with intellectual disability: health services considerations. *Disabil Rehabil* 1999; **21(5-6)**: 284-94.
- 23 Tyrer F, McGrother C. Cause-specific mortality and death certificate reporting in adults with moderate to profound intellectual disability. *J Intellect Disabil Res* 2009; **53(11)**: 898-904.
- 24 Hosking FJ, Carey IM, Shah SM, Harris T, DeWilde S, Beighton C, et al. Mortality among adults with intellectual disability in England: comparisons with the general population. *Am J Public Health* 2016; **106(8)**: 1483-90.
- 25 Trollor J, Srasuebku P, Xu H, Howlett S. Cause of death and potentially avoidable deaths in Australian adults with intellectual disability using retrospective linked data. *BMJ Open* 2017; **7(2)**: e013489. DOI:10.1136/bmjopen-2016-013489.



- 1  
2  
3  
4  
5  
6  
7  
8  
9  
10  
11  
12  
13  
14  
15  
16  
17  
18  
19  
20  
21  
22  
23  
24  
25  
26  
27  
28  
29  
30  
31  
32  
33  
34  
35  
36  
37  
38  
39  
40  
41  
42  
43  
44  
45  
46  
47  
48  
49  
50  
51  
52  
53  
54  
55  
56  
57  
58  
59  
60
- 26 Brameld K, Spilsbury K, Rosenwax L, Leonard H, Semmens J. Use of health services in the last year of life and cause of death in people with intellectual disability: a retrospective matched cohort study. *BMJ Open* 2018; 8(2):e020268. DOI:10.1136/bmjopen-2017-020268.
- 27 Oppewal A, Schoufour JD, van der Maarl HJ, Evenhuis HM, Hilgenkamp TI, Festen DA. Causes of mortality in older people with intellectual disability: results from the HA-ID study. *Am J Intellect Dev Disabil* 2018; **123(1)**: 61-71.
- 28 Cooper S-A, Allan L, Greenlaw N, McSkimming, P, Jasilek A, Henderson et al. Rates, causes, place and predictors of mortality in adults with intellectual disabilities with and without Down syndrome: cohort study with record linkage. *BMJ Open* 2020 (Accepted for Publication).
- 29 Durvasula S, Beange H, Baker W. Mortality of people with intellectual disability in northern Sydney. *J Intellect Dev Disabil* 2002; **27(4)**: 255-64.
- 30 Patja K, Iivanainen M, Vesala H, Oksanen H, Ruoppila I. Life expectancy of people with intellectual disability: a 35-year follow-up study. *J Intellect Disabil Res* 2000; **44(5)**: 591-9.
- 31 Mandell LA, Wunderink RG, Anzueto A, Bartlett JG, Campbell GD, Dean NC et al. Infectious Diseases Society of America/ American Thoracic Society consensus guidelines on the management of community-acquired pneumonia in adults. *Clin Infect Dis* 2007; **44 (Suppl 2)**: S27-72.
- 32 Flannery B, Reynolds SB, Blanton L, Santibanez TA, O'Halloran A, Lu PJ, et al. Influenza vaccine effectiveness against pediatric deaths: 2010–2014. *Pediatrics* 2017; **139(5)**: e20164244. DOI:10.1542/peds.2016-4244
- 33 Backer JA, Wallinga J, Meijer A, Donker GA, Van der Hoek W, Van Boven M. The impact of influenza vaccination on infection, hospitalisation and mortality in the Netherlands between 2003 and 2015. *Epidemics* 2019 Mar 1;26:77-85.
- 34 Robertson J, Hatton C, Emerson E, Baines S. The impact of health checks for people with intellectual disabilities: an updated systematic review of evidence. *Res Dev Disabil* 2014; **35(10)**: 2450-62.
- 35 Chadwick DD, Jolliffe J. A descriptive investigation of dysphagia in adults with intellectual disabilities. *J Intellect Disabil Res* 2009; **53(1)**: 29-43.
- 36 Robertson J, Chadwick D, Baines S, Emerson E, Hatton C. Prevalence of dysphagia in people with intellectual disability: a systematic review. *Intellect Dev Disabil* 2017; **55(6)**: 377-91.

- 1  
2  
3 37 Durvasula, S, Beange H, Baker, W. Mortality of people with intellectual disability in  
4 northern Sydney. *J Intellect Dev Disabil* 2002; **27(4)**: 255-264.  
5  
6 DOI:10.1080/1366825021000029311  
7  
8 38 Glover G, Ayub M. How people with learning disabilities die. Improving Health and Lives  
9 Learning Disabilities Observatory. Durham, 2010.  
10  
11 39 Landes SD, Turk MA, Formica MK, McDonald KE, Stevens JD. COVID\_19 outcomes  
12 among people with intellectual and developmental disability living in residential group  
13 homes in New York State. *Disability and Health Journal*, 2020 Oct 1;13(4): 100969  
14  
15 40 Cuypers M, Schalk BW, Koks-Leensen MC, Nägele ME, Bakker-van Gijssel EJ,  
16 Naaldenberg J, Leusink GL. Mortality of people with intellectual disabilities during the  
17 2017/2018 influenza epidemic in the Netherlands: potential implications for the  
18 COVID-19 pandemic. *Journal of Intellectual Disability Research*. 2020 May 26.  
19  
20 41 Blair E, Langdon K, McIntyre S, Lawrence D, Watson L. Survival and mortality in cerebral  
21 palsy: observations to the sixth decade from a data linkage study of a total population  
22 register and National Death Index. *BMC Neurol* 2019; **19(1)**: 111  
23  
24 42 Landes SD, Peek CW. Death by mental retardation? The influence of ambiguity on death  
25 certificate coding error for adults with intellectual disability. *Journal of Intellectual*  
26 *Disability Research*. 2013 Dec;57(12):1183-90.  
27  
28 43 Dunwoodie Stirton F, Heslop P. Medical certificates of cause of death for people with  
29 intellectual disabilities: a systematic literature review. *Journal of Applied Research in*  
30 *Intellectual Disabilities*. 2018 Sep;31(5):659-68.  
31  
32  
33  
34  
35  
36  
37  
38  
39  
40  
41  
42  
43  
44  
45  
46  
47  
48  
49  
50  
51  
52  
53  
54  
55  
56  
57  
58  
59  
60

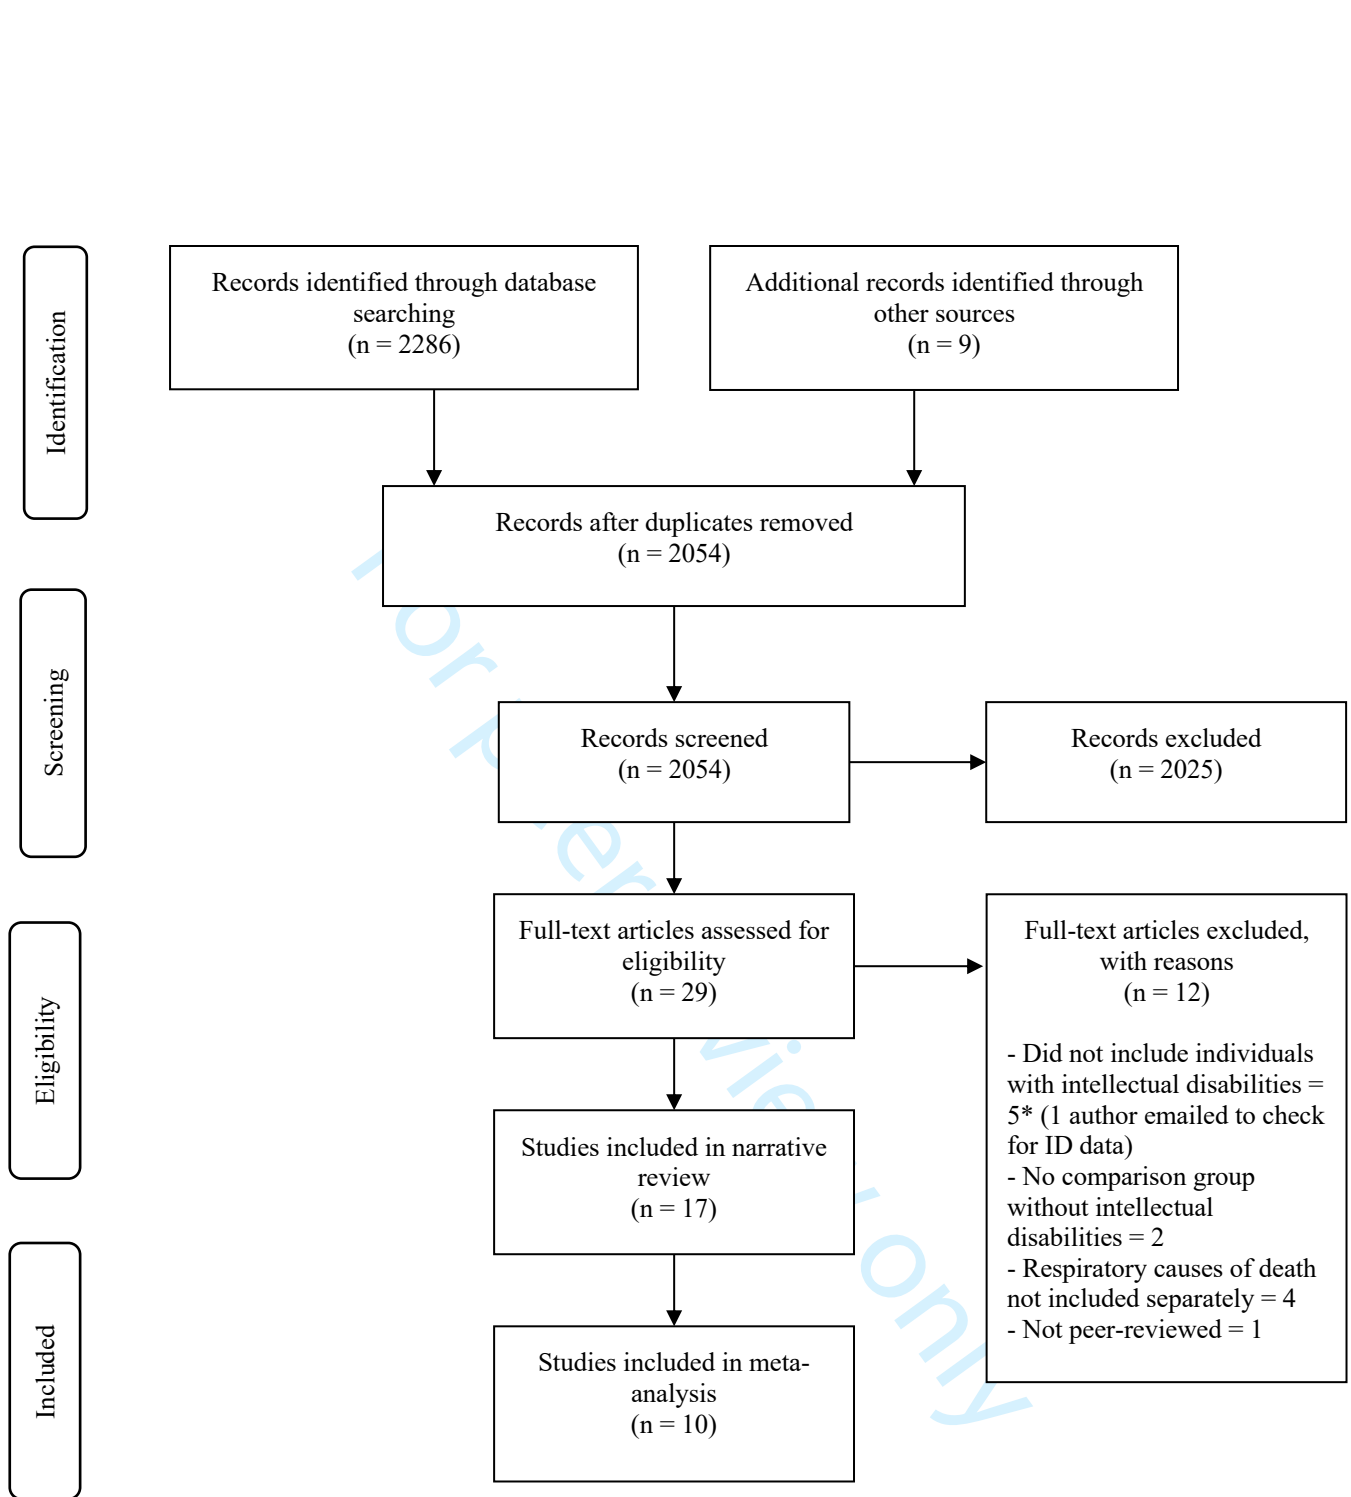

Figure 2: Forest plot of respiratory associated mortality

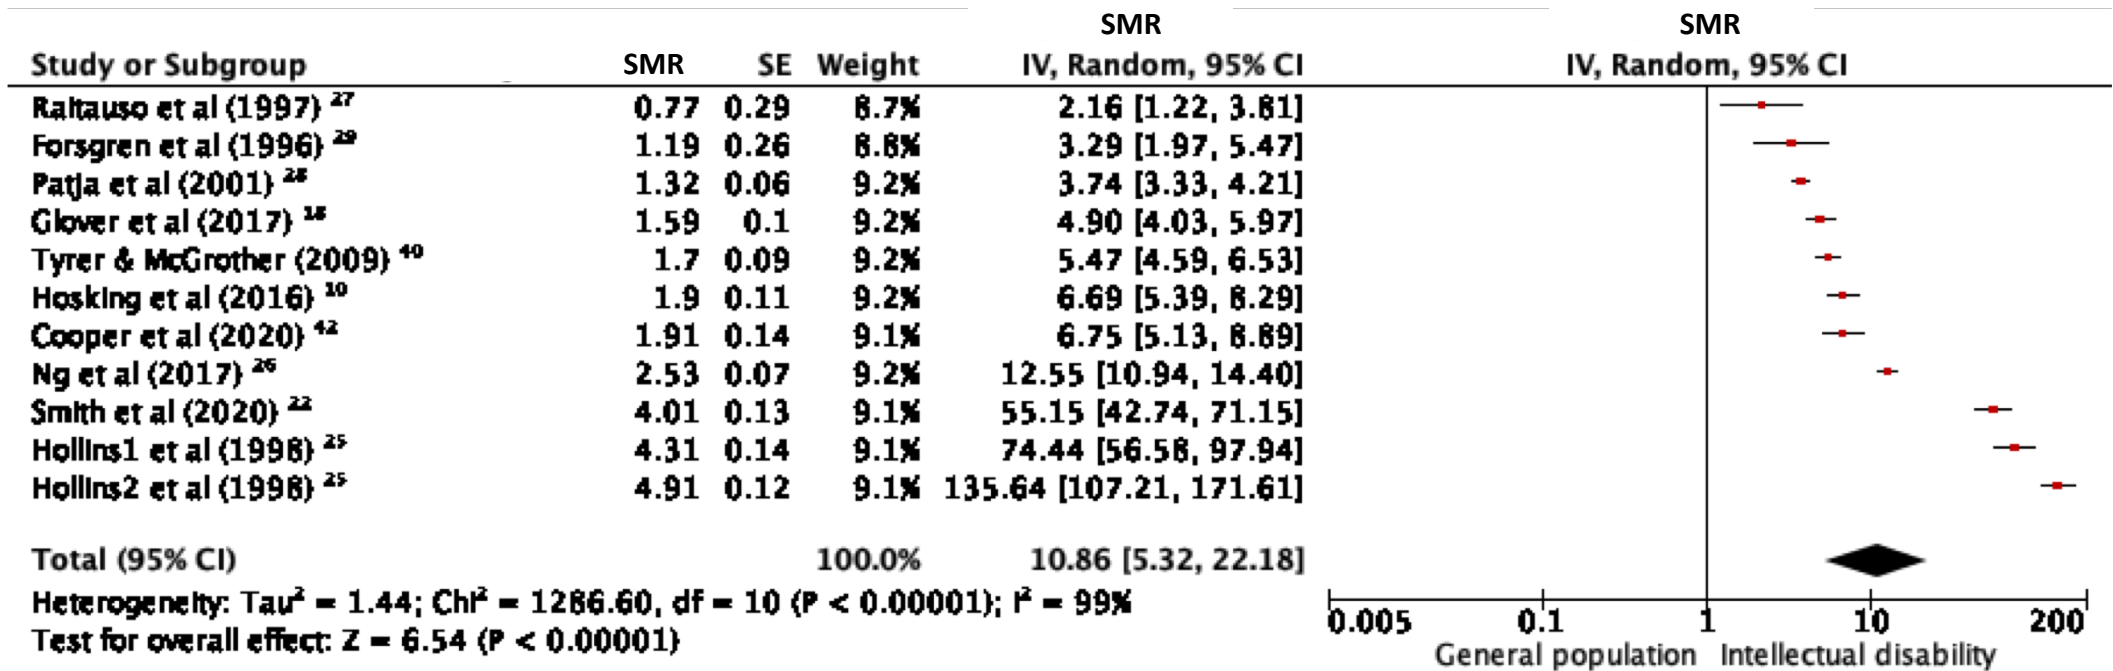

Figure 3: Forest plot for adults only

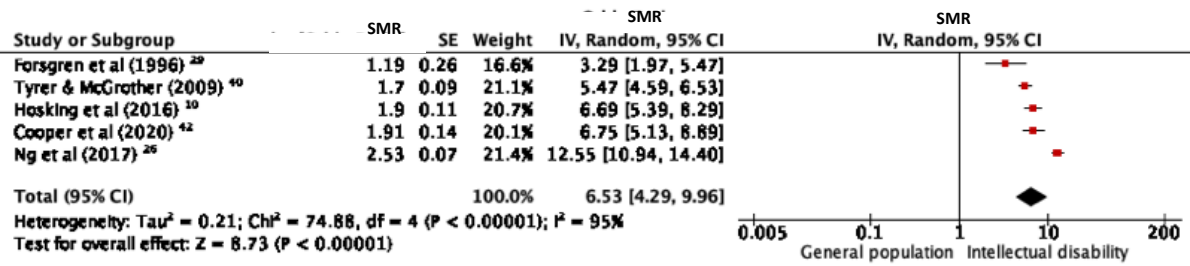

For peer review only

Figure 4: Forest plot pneumonia related mortality

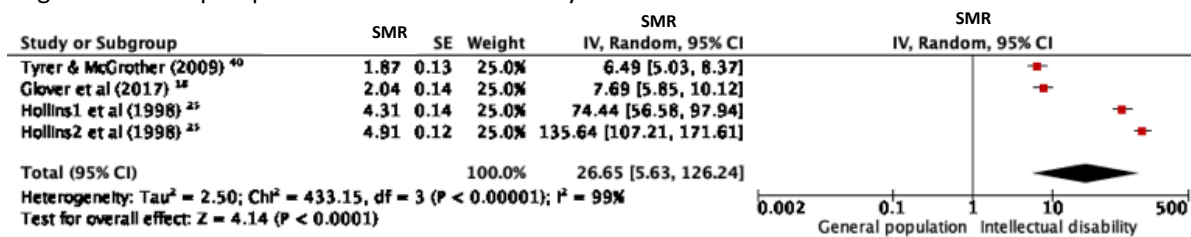

For peer review only

## Appendix 1: Search strategy

### Embase- Ovid, 2016-

| Search Terms |                                                                                                                                                                                                                                                                                                                                                                                                                                                                                                                                                                                                                                                                                                                                                                                                                                                                                                                                                                                                   |
|--------------|---------------------------------------------------------------------------------------------------------------------------------------------------------------------------------------------------------------------------------------------------------------------------------------------------------------------------------------------------------------------------------------------------------------------------------------------------------------------------------------------------------------------------------------------------------------------------------------------------------------------------------------------------------------------------------------------------------------------------------------------------------------------------------------------------------------------------------------------------------------------------------------------------------------------------------------------------------------------------------------------------|
| 1.           | developmental disorder/ or intellectual impairment/ or developmental disabilities/ or intellectual disability/ or mentally disabled persons/ or intellectual development disorder/ or "intellectual development disorder (attitudes toward)"/                                                                                                                                                                                                                                                                                                                                                                                                                                                                                                                                                                                                                                                                                                                                                     |
| 2.           | ((intellect\$ adj3 (deficien\$ or difficult\$ or disab\$ or disorder\$ or impair\$ or handicap\$ or incapacit\$ or handicap\$ or sub?average or sub?norm\$)) or (low\$2 adj2 intellect\$)).tw.                                                                                                                                                                                                                                                                                                                                                                                                                                                                                                                                                                                                                                                                                                                                                                                                    |
| 3.           | (learning adj3 (deficien\$ or difficult\$ or disab\$ or disorder\$ or handicap\$ or impair\$ or incapacit\$ or handicap\$ or sub?average or sub?norm\$)).tw.                                                                                                                                                                                                                                                                                                                                                                                                                                                                                                                                                                                                                                                                                                                                                                                                                                      |
| 4.           | (mental\$ adj3 (deficien\$ or disab\$ or handicap\$ or impair\$ or handicap\$ or incapacit\$ or retard\$ or sub?average or sub?norm\$)).tw.                                                                                                                                                                                                                                                                                                                                                                                                                                                                                                                                                                                                                                                                                                                                                                                                                                                       |
| 5.           | ((subaverage or sub\$1 average or subnormal or sub\$1 normal\$) adj3 (cognit\$ or intel\$)).tw.                                                                                                                                                                                                                                                                                                                                                                                                                                                                                                                                                                                                                                                                                                                                                                                                                                                                                                   |
| 6.           | ((development\$ or neurodevelopment\$) adj disab\$).tw.                                                                                                                                                                                                                                                                                                                                                                                                                                                                                                                                                                                                                                                                                                                                                                                                                                                                                                                                           |
| 7.           | (education\$ adj5 sub?norm\$).tw.                                                                                                                                                                                                                                                                                                                                                                                                                                                                                                                                                                                                                                                                                                                                                                                                                                                                                                                                                                 |
| 8.           | (cretin\$ or feeble minded\$ or imbecil\$ or moron\$).tw.                                                                                                                                                                                                                                                                                                                                                                                                                                                                                                                                                                                                                                                                                                                                                                                                                                                                                                                                         |
| 9.           | Or/ 1-9                                                                                                                                                                                                                                                                                                                                                                                                                                                                                                                                                                                                                                                                                                                                                                                                                                                                                                                                                                                           |
| 10.          | cause of death/ OR mortality/ OR fatal outcome/ OR death/ OR hospital mortality/ OR mortality.ti,ab OR fatal.ti,ab OR death.ti,ab                                                                                                                                                                                                                                                                                                                                                                                                                                                                                                                                                                                                                                                                                                                                                                                                                                                                 |
| 11.          | asthma/ OR asthma.ti,ab OR bronchial asthma.ti,ab OR asthma, bronchial.ti,ab OR pneumonia/ OR pneumonia.ti,ab OR lobar pneumonia.ti,ab OR lobar pneumonia.ti,ab OR pneumonia, lobar.ti,ab OR bacterial pneumonia/ OR pneumonia, bacterial.ti,ab OR viral pneumonia/ OR pneumonia, viral.ti,ab OR viral pneumonia.ti,ab OR bronchopneumonia/ OR bronchopneumonia.ti,ab OR bronchial pneumonia.ti,ab OR pneumonia, bronchial.ti,ab OR lung disease/ OR disease, lung.ti,ab OR pulmonary disease.ti,ab OR disease, pulmonary.ti,ab OR respiratory disease.ti,ab OR disease, respiratory.ti,ab OR chronic obstructive lung disease/ OR lung disease, obstructive.ti,ab OR obstructive lung disease.ti,ab OR obstructive lung diseases.ti,ab OR obstructive pulmonary diseases.ti,ab OR aspiration pneumonia/ OR aspiration pneumonia.ti,ab OR bronchiectasis/ OR bronchiectasis.ti,ab OR respiratory failure/ OR respiratory failure.ti,ab OR interstitial pneumonia/ Or interstitial pneumonia.ti,ab |
| 12.          | 9 and 10 and 11                                                                                                                                                                                                                                                                                                                                                                                                                                                                                                                                                                                                                                                                                                                                                                                                                                                                                                                                                                                   |

**Cinahl and APA PsychINFO - Ebscohost, 2016-**

| Search Terms |                                                                                                                                                                                                                                                                                                                                                                                                                                 |
|--------------|---------------------------------------------------------------------------------------------------------------------------------------------------------------------------------------------------------------------------------------------------------------------------------------------------------------------------------------------------------------------------------------------------------------------------------|
| 1.           | MH Intellectual disability                                                                                                                                                                                                                                                                                                                                                                                                      |
| 2.           | (MH "Mentally Disabled Persons")                                                                                                                                                                                                                                                                                                                                                                                                |
| 3.           | TX (intellectual* N3 (disab* or disorder* or handicap* or impair* or deficien* or subnorm*))                                                                                                                                                                                                                                                                                                                                    |
| 4.           | TX (learning N3 (disab* or disorder* or impair* or difficllt*))                                                                                                                                                                                                                                                                                                                                                                 |
| 5.           | TX (development* N3 (disab* or disorder* or handicap* or impair* or delay*))                                                                                                                                                                                                                                                                                                                                                    |
| 6.           | TX (Mental* N3 (disab* or disorder* or handicap* or impair* or deficien* or subnorm* or retard*))                                                                                                                                                                                                                                                                                                                               |
| 7.           | ((development\$ or neurodevelopment\$) N disab\$).tw.                                                                                                                                                                                                                                                                                                                                                                           |
| 8.           | (education\$ N5 su?bnorm\$).tw.                                                                                                                                                                                                                                                                                                                                                                                                 |
| 9.           | (cretin\$ or feeble minded\$ or imbecil\$ or moron\$).tw.                                                                                                                                                                                                                                                                                                                                                                       |
| 10.          | S1 OR S2 OR S3 OR S4 OR S5 OR S6 OR S7 OR S8 OR S9 OR S10                                                                                                                                                                                                                                                                                                                                                                       |
| 11.          | cause of death/                                                                                                                                                                                                                                                                                                                                                                                                                 |
| 12.          | mortality/                                                                                                                                                                                                                                                                                                                                                                                                                      |
| 13.          | fatal outcome/                                                                                                                                                                                                                                                                                                                                                                                                                  |
| 14.          | death/                                                                                                                                                                                                                                                                                                                                                                                                                          |
| 15.          | hospital mortality/                                                                                                                                                                                                                                                                                                                                                                                                             |
| 16.          | mortality.ti.ab                                                                                                                                                                                                                                                                                                                                                                                                                 |
| 17.          | fatal.ti.ab                                                                                                                                                                                                                                                                                                                                                                                                                     |
| 18.          | death.ti.ab                                                                                                                                                                                                                                                                                                                                                                                                                     |
| 19.          | Or/ 11-18                                                                                                                                                                                                                                                                                                                                                                                                                       |
| 20.          | "pulmonary disease" or "airway disease" or "broncho-pulmonary disease" or "respiratory disease" or "lung disease" or "lung disorder" or "pulmonary disorder" or "respiratory disorder" or "pneumonia" or "bronchopneumonia" or "lung infection" or pulmonary infection" or respiratory infection" or "asthma" or "chronic obstructive pulmonary disease" or "aspiration pneumonia" or "bronchiectasis" or "respiratory failure" |
| 21.          | 10 and 19 and 20                                                                                                                                                                                                                                                                                                                                                                                                                |

Web of Science (All databases, including MEDLINE) 2016-current

TS= mortality OR death OR cause of death OR cause of mortality OR dead OR died  
AND

TS= intellectual disab\* or intellectual impair\* or developmental disab\* or learning disab\* or mental retard\* or mental handicap\*

AND

TS=asthma\* or bronchial asthma or pneumoni\* or lobar pneumoni\* or lobar pneumoni\* or bacterial pneumoni\* or viral pneumoni\* or bronchopneumonia\* or bronchial pneumoni\* or lung disease\* or lung disorder\* or lung infect\* or pulmonary disease\* or pulmonary disorder or pulmonary infect\* or respiratory disease\* or respiratory disorder or respiratory infect\* or obstructive lung disease\* or obstructive pulmonary disease\* or aspiration pneumoni\* or bronchiecstasi



1  
2  
3  
4  
5  
6  
7  
8  
9  
10  
11  
12  
13  
14  
15  
16  
17  
18  
19  
20  
21  
22  
23  
24  
25  
26  
27  
28  
29  
30  
31  
32  
33  
34  
35  
36  
37  
38  
39  
40  
41  
42  
43  
44  
45  
46  
47  
48  
49  
50  
51  
52  
53  
54  
55  
56  
57  
58  
59  
60

For peer review only

## Appendix 2: Excluded papers – References and reasons for exclusion

|    | Reference                                                                                                                                                                                                                                                     | Reason                                                      |
|----|---------------------------------------------------------------------------------------------------------------------------------------------------------------------------------------------------------------------------------------------------------------|-------------------------------------------------------------|
| 1  | Bilder D, Botts EL, Smith KR, Pimentel R, Farley M, Viskochil J. Excess mortality and causes of death in autism spectrum disorders: A follow up of the 1980s Utah/ UCLA autism epidemiologic study. <i>J Autism Dev Disord</i> 2013; <b>43(5)</b> : 1196-1204 | Did not include individuals with intellectual disabilities. |
| 2  | Decoufle P, Autry A. Increased mortality in children and adolescents with developmental disabilities. <i>Paediatr Perinat Epidemiol</i> 2002; <b>16(4)</b> : 375-382                                                                                          | No general population comparison group.                     |
| 3  | Florio T, Trollor J. Mortality among a cohort of persons with an intellectual disability in New South Wales, Australia. <i>J Appl Res Intellect Disabil</i> 2015; <b>28(5)</b> : 383-393.                                                                     | Respiratory causes of death not included separately.        |
| 4  | Glover G, Ayub M. How people with learning disabilities die. Improving Health and Lives Learning Disabilities Observatory. Durham, 2010.                                                                                                                      | Not peer-reviewed.                                          |
| 5  | Jahan I, Karim T, Das MC, Muhit M, McIntyre S, Smithers-Sheedy H, et al. Mortality in children with cerebral palsy in rural Bangladesh: a population-based surveillance study. <i>Dev Med Child Neurol</i> 2019; <b>61(11)</b> : 1336-1343                    | Did not include individuals with intellectual disabilities. |
| 6  | McCarron M, Carroll R, Kelly C, McCallion P. Mortality rates in the general Irish population compared to those with an intellectual disability from 2003 to 2012. <i>J Appl Res Intellect Disabil</i> 2015; <b>28(5)</b> : 406-413.                           | Respiratory causes of death not included separately.        |
| 7  | Perez CM, Ball SL, Wagner AP, Clare ICH, Holland AJ, Redley M. The incidence of healthcare use, ill health and mortality in adults with intellectual disabilities and mealtime support needs. <i>J Intellect Disabil Res</i> 2015; <b>59(7)</b> : 638-652     | No general population comparison group.                     |
| 8  | Reid, SM, Carlin JB, Reddihough DS. Survival of individuals with cerebral palsy born in Victoria, Australia, between 1970 and 2004. <i>Dev Med Child Neurol</i> 2012; <b>54(4)</b> : 353-360                                                                  | Did not include individuals with intellectual disabilities. |
| 9  | Shavelle, Robert M.; Strauss, David J.; Pickett, Jane Causes of death in autism. <i>J Autism Dev Disord</i> 2001; <b>31(6)</b> : 569-576                                                                                                                      | Did not include individuals with intellectual disabilities. |
| 10 | Similä S, Von Wendt L, Rantakallio P. Mortality of mentally retarded children to 17 years of age assessed in a prospective one-year birth cohort. <i>J Ment Defic Res</i> 1986; <b>30</b> : 401-5                                                             | Respiratory causes of death not included separately.        |

|                                                                                                                                                                                                                                                                                  |    |                                                                                                                                                                                                                                |                                                                                                                                                                                         |
|----------------------------------------------------------------------------------------------------------------------------------------------------------------------------------------------------------------------------------------------------------------------------------|----|--------------------------------------------------------------------------------------------------------------------------------------------------------------------------------------------------------------------------------|-----------------------------------------------------------------------------------------------------------------------------------------------------------------------------------------|
| 1<br>2<br>3<br>4<br>5<br>6<br>7<br>8<br>9<br>10<br>11<br>12<br>13<br>14                                                                                                                                                                                                          | 11 | Stankiewicz E, Ouellette-Kuntz H, McIsaac M, Shoostari S, Balogh R. Patterns of mortality among adults with intellectual and developmental disabilities in Ontario. <i>Can J Public Health</i> 2018; <b>109(5-6)</b> : 866-872 | <70%* of participants had intellectual disabilities.<br>*We emailed this author to check if >70% of sample had ID – they replied but didn't have the data to check, so it was excluded. |
| 15<br>16<br>17<br>18<br>19<br>20<br>21<br>22<br>23<br>24<br>25<br>26<br>27<br>28<br>29<br>30<br>31<br>32<br>33<br>34<br>35<br>36<br>37<br>38<br>39<br>40<br>41<br>42<br>43<br>44<br>45<br>46<br>47<br>48<br>49<br>50<br>51<br>52<br>53<br>54<br>55<br>56<br>57<br>58<br>59<br>60 | 12 | Tyrer F, Smith LK, McGrother CW. Mortality in adults with moderate to profound intellectual disability: a population-based study. <i>J Intellect Disabil Res</i> , 2007; <b>51(7)</b> : 520-527.                               | Respiratory causes of death not included separately.                                                                                                                                    |

Sensitivity A- minus Raitasuo

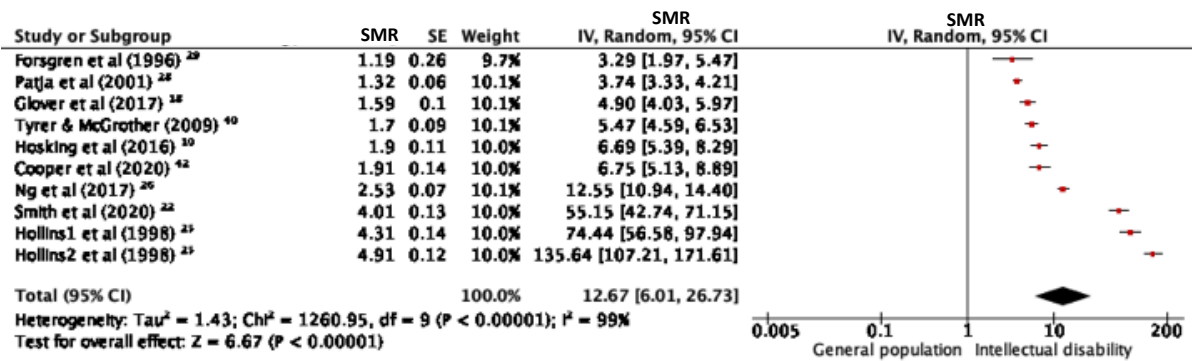

Sensitivity B- minus Raitasuo and Tyrer

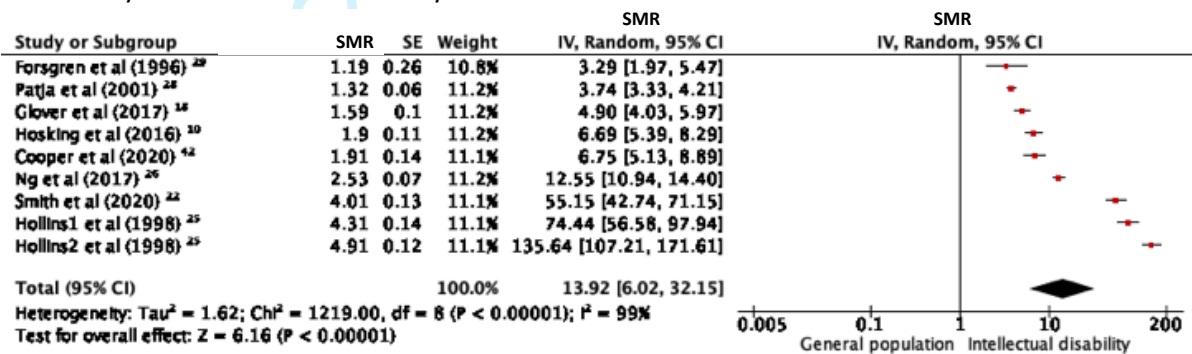



# PRISMA 2009 Checklist

| Section/topic                      | #  | Checklist item                                                                                                                                                                                                                                                                                              | Reported on page #     |
|------------------------------------|----|-------------------------------------------------------------------------------------------------------------------------------------------------------------------------------------------------------------------------------------------------------------------------------------------------------------|------------------------|
| <b>TITLE</b>                       |    |                                                                                                                                                                                                                                                                                                             |                        |
| Title                              | 1  | Identify the report as a systematic review, meta-analysis, or both.                                                                                                                                                                                                                                         | 2                      |
| <b>ABSTRACT</b>                    |    |                                                                                                                                                                                                                                                                                                             |                        |
| Structured summary                 | 2  | Provide a structured summary including, as applicable: background; objectives; data sources; study eligibility criteria, participants, and interventions; study appraisal and synthesis methods; results; limitations; conclusions and implications of key findings; systematic review registration number. | 3                      |
| <b>INTRODUCTION</b>                |    |                                                                                                                                                                                                                                                                                                             |                        |
| Rationale                          | 3  | Describe the rationale for the review in the context of what is already known.                                                                                                                                                                                                                              | 4                      |
| Objectives                         | 4  | Provide an explicit statement of questions being addressed with reference to participants, interventions, comparisons, outcomes, and study design (PICOS).                                                                                                                                                  | 4                      |
| <b>METHODS</b>                     |    |                                                                                                                                                                                                                                                                                                             |                        |
| Protocol and registration          | 5  | Indicate if a review protocol exists, if and where it can be accessed (e.g., Web address), and, if available, provide registration information including registration number.                                                                                                                               | 3                      |
| Eligibility criteria               | 6  | Specify study characteristics (e.g., PICOS, length of follow-up) and report characteristics (e.g., years considered, language, publication status) used as criteria for eligibility, giving rationale.                                                                                                      | 4/5                    |
| Information sources                | 7  | Describe all information sources (e.g., databases with dates of coverage, contact with study authors to identify additional studies) in the search and date last searched.                                                                                                                                  | 5                      |
| Search                             | 8  | Present full electronic search strategy for at least one database, including any limits used, such that it could be repeated.                                                                                                                                                                               | 5 and Appx 1 pgs 35-36 |
| Study selection                    | 9  | State the process for selecting studies (i.e., screening, eligibility, included in systematic review, and, if applicable, included in the meta-analysis).                                                                                                                                                   | 5                      |
| Data collection process            | 10 | Describe method of data extraction from reports (e.g., piloted forms, independently, in duplicate) and any processes for obtaining and confirming data from investigators.                                                                                                                                  | 5                      |
| Data items                         | 11 | List and define all variables for which data were sought (e.g., PICOS, funding sources) and any assumptions and simplifications made.                                                                                                                                                                       | 5                      |
| Risk of bias in individual studies | 12 | Describe methods used for assessing risk of bias of individual studies (including specification of whether this was done at the study or outcome level), and how this information is to be used in any data synthesis.                                                                                      | 6                      |
| Summary measures                   | 13 | State the principal summary measures (e.g., risk ratio, difference in means).                                                                                                                                                                                                                               | 11                     |

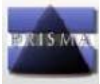

# PRISMA 2009 Checklist

|                      |    |                                                                                                                                                           |    |
|----------------------|----|-----------------------------------------------------------------------------------------------------------------------------------------------------------|----|
| Synthesis of results | 14 | Describe the methods of handling data and combining results of studies, if done, including measures of consistency (e.g., $I^2$ ) for each meta-analysis. | 11 |
|----------------------|----|-----------------------------------------------------------------------------------------------------------------------------------------------------------|----|

Page 1 of 2

| Section/topic                 | #  | Checklist item                                                                                                                                                                                           | Reported on page #          |
|-------------------------------|----|----------------------------------------------------------------------------------------------------------------------------------------------------------------------------------------------------------|-----------------------------|
| Risk of bias across studies   | 15 | Specify any assessment of risk of bias that may affect the cumulative evidence (e.g., publication bias, selective reporting within studies).                                                             | 12                          |
| Additional analyses           | 16 | Describe methods of additional analyses (e.g., sensitivity or subgroup analyses, meta-regression), if done, indicating which were pre-specified.                                                         | 12                          |
| <b>RESULTS</b>                |    |                                                                                                                                                                                                          |                             |
| Study selection               | 17 | Give numbers of studies screened, assessed for eligibility, and included in the review, with reasons for exclusions at each stage, ideally with a flow diagram.                                          | 12, 39                      |
| Study characteristics         | 18 | For each study, present characteristics for which data were extracted (e.g., study size, PICOS, follow-up period) and provide the citations.                                                             | 12-23                       |
| Risk of bias within studies   | 19 | Present data on risk of bias of each study and, if available, any outcome level assessment (see item 12).                                                                                                | -                           |
| Results of individual studies | 20 | For all outcomes considered (benefits or harms), present, for each study: (a) simple summary data for each intervention group (b) effect estimates and confidence intervals, ideally with a forest plot. | 25,26<br>Appx.3<br>pg 40-42 |
| Synthesis of results          | 21 | Present results of each meta-analysis done, including confidence intervals and measures of consistency.                                                                                                  | 25                          |
| Risk of bias across studies   | 22 | Present results of any assessment of risk of bias across studies (see Item 15).                                                                                                                          | -                           |
| Additional analysis           | 23 | Give results of additional analyses, if done (e.g., sensitivity or subgroup analyses, meta-regression [see Item 16]).                                                                                    | 26                          |
| <b>DISCUSSION</b>             |    |                                                                                                                                                                                                          |                             |
| Summary of evidence           | 24 | Summarize the main findings including the strength of evidence for each main outcome; consider their relevance to key groups (e.g., healthcare providers, users, and policy makers).                     | 26                          |
| Limitations                   | 25 | Discuss limitations at study and outcome level (e.g., risk of bias), and at review-level (e.g., incomplete retrieval of identified research, reporting bias).                                            | 27                          |
| Conclusions                   | 26 | Provide a general interpretation of the results in the context of other evidence, and implications for future research.                                                                                  | 28                          |
| <b>FUNDING</b>                |    |                                                                                                                                                                                                          |                             |
| Funding                       | 27 | Describe sources of funding for the systematic review and other support (e.g., supply of data); role of funders for the systematic review.                                                               | 29                          |

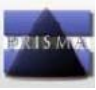

# PRISMA 2009 Checklist

1  
2  
3  
4  
5  
6  
7  
8  
9  
10  
11  
12  
13  
14  
15  
16  
17  
18  
19  
20  
21  
22  
23  
24  
25  
26  
27  
28  
29  
30  
31  
32  
33  
34  
35  
36  
37  
38  
39  
40  
41  
42  
43  
44  
45  
46  
47

From: Moher D, Liberati A, Tetzlaff J, Altman DG, The PRISMA Group (2009). Preferred Reporting Items for Systematic Reviews and Meta-Analyses: The PRISMA Statement. PLoS Med 6(7): e1000097. doi:10.1371/journal.pmed1000097

For more information, visit: [www.prisma-statement.org](http://www.prisma-statement.org).

Page 2 of 2

For peer review only
