# Supplementary material for: Respiratory-associated deaths in people with intellectual disabilities: a systematic review and meta-analysis
Source: PubMed Central journal article supplement — BMJ Open. 2021 Jul 14;11(7):e043658. doi: 10.1136/bmjopen-2020-043658 (PMC8280912; doi:10.1136/bmjopen-2020-043658), 2021-07-14
Supplement: bmjopen-2020-043658supp001.pdf [file bmjopen-2020-043658supp001.pdf]

## Appendix 1: Search strategy

### Embase- Ovid, 2016-

| Search Terms |                                                                                                                                                                                                                                                                                                                                                                                                                                                                                                                                                                                                                                                                                                                                                                                                                                                                                                                                                                                                   |
|--------------|---------------------------------------------------------------------------------------------------------------------------------------------------------------------------------------------------------------------------------------------------------------------------------------------------------------------------------------------------------------------------------------------------------------------------------------------------------------------------------------------------------------------------------------------------------------------------------------------------------------------------------------------------------------------------------------------------------------------------------------------------------------------------------------------------------------------------------------------------------------------------------------------------------------------------------------------------------------------------------------------------|
| 1.           | developmental disorder/ or intellectual impairment/ or developmental disabilities/ or intellectual disability/ or mentally disabled persons/ or intellectual development disorder/ or "intellectual development disorder (attitudes toward)"/                                                                                                                                                                                                                                                                                                                                                                                                                                                                                                                                                                                                                                                                                                                                                     |
| 2.           | ((intellect\$ adj3 (deficien\$ or difficult\$ or disab\$ or disorder\$ or impair\$ or handicap\$ or incapacit\$ or handicap\$ or sub?average or sub?norm\$)) or (low\$2 adj2 intellect\$)).tw.                                                                                                                                                                                                                                                                                                                                                                                                                                                                                                                                                                                                                                                                                                                                                                                                    |
| 3.           | (learning\$ adj3 (deficien\$ or difficult\$ or disab\$ or disorder\$ or handicap\$ or impair\$ or incapacit\$ or handicap\$ or sub?average or sub?norm\$)).tw.                                                                                                                                                                                                                                                                                                                                                                                                                                                                                                                                                                                                                                                                                                                                                                                                                                    |
| 4.           | (mental\$ adj3 (deficien\$ or disab\$ or handicap\$ or impair\$ or handicap\$ or incapacit\$ or retard\$ or sub?average or sub?norm\$)).tw.                                                                                                                                                                                                                                                                                                                                                                                                                                                                                                                                                                                                                                                                                                                                                                                                                                                       |
| 5.           | ((subaverage or sub\$1 average or subnormal or sub\$1 normal\$) adj3 (cognit\$ or intel\$)).tw.                                                                                                                                                                                                                                                                                                                                                                                                                                                                                                                                                                                                                                                                                                                                                                                                                                                                                                   |
| 6.           | ((development\$ or neurodevelopment\$) adj disab\$).tw.                                                                                                                                                                                                                                                                                                                                                                                                                                                                                                                                                                                                                                                                                                                                                                                                                                                                                                                                           |
| 7.           | (education\$ adj5 sub?norm\$).tw.                                                                                                                                                                                                                                                                                                                                                                                                                                                                                                                                                                                                                                                                                                                                                                                                                                                                                                                                                                 |
| 8.           | (cretin\$ or feeble minded\$ or imbecil\$ or moron\$).tw.                                                                                                                                                                                                                                                                                                                                                                                                                                                                                                                                                                                                                                                                                                                                                                                                                                                                                                                                         |
| 9.           | Or/ 1-9                                                                                                                                                                                                                                                                                                                                                                                                                                                                                                                                                                                                                                                                                                                                                                                                                                                                                                                                                                                           |
| 10.          | cause of death/ OR mortality/ OR fatal outcome/ OR death/ OR hospital mortality/ OR mortality.ti,ab OR fatal.ti,ab OR death.ti,ab                                                                                                                                                                                                                                                                                                                                                                                                                                                                                                                                                                                                                                                                                                                                                                                                                                                                 |
| 11.          | asthma/ OR asthma.ti,ab OR bronchial asthma.ti,ab OR asthma, bronchial.ti,ab OR pneumonia/ OR pneumonia.ti,ab OR lobar pneumonia.ti,ab OR lobar pneumonia.ti,ab OR pneumonia, lobar.ti,ab OR bacterial pneumonia/ OR pneumonia, bacterial.ti,ab OR viral pneumonia/ OR pneumonia, viral.ti,ab OR viral pneumonia.ti,ab OR bronchopneumonia/ OR bronchopneumonia.ti,ab OR bronchial pneumonia.ti,ab OR pneumonia, bronchial.ti,ab OR lung disease/ OR disease, lung.ti,ab OR pulmonary disease.ti,ab OR disease, pulmonary.ti,ab OR respiratory disease.ti,ab OR disease, respiratory.ti,ab OR chronic obstructive lung disease/ OR lung disease, obstructive.ti,ab OR obstructive lung disease.ti,ab OR obstructive lung diseases.ti,ab OR obstructive pulmonary diseases.ti,ab OR aspiration pneumonia/ OR aspiration pneumonia.ti,ab OR bronchiectasis/ OR bronchiectasis.ti,ab OR respiratory failure/ OR respiratory failure.ti,ab OR interstitial pneumonia/ Or interstitial pneumonia.ti,ab |
| 12.          | 9 and 10 and 11                                                                                                                                                                                                                                                                                                                                                                                                                                                                                                                                                                                                                                                                                                                                                                                                                                                                                                                                                                                   |

**Cinahl and APA PsychINFO - Ebscohost, 2016-**

| Search Terms |                                                                                                                                                                                                                                                                                                                                                                                                                                 |
|--------------|---------------------------------------------------------------------------------------------------------------------------------------------------------------------------------------------------------------------------------------------------------------------------------------------------------------------------------------------------------------------------------------------------------------------------------|
| 1.           | MH Intellectual disability                                                                                                                                                                                                                                                                                                                                                                                                      |
| 2.           | (MH "Mentally Disabled Persons")                                                                                                                                                                                                                                                                                                                                                                                                |
| 3.           | TX (intellectual* N3 (disab* or disorder* or handicap* or impair* or deficien* or subnorm*))                                                                                                                                                                                                                                                                                                                                    |
| 4.           | TX (learning N3 (disab* or disorder* or impair* or difficult*))                                                                                                                                                                                                                                                                                                                                                                 |
| 5.           | TX (development* N3 (disab* or disorder* or handicap* or impair* or delay*))                                                                                                                                                                                                                                                                                                                                                    |
| 6.           | TX (Mental* N3 (disab* or disorder* or handicap* or impair* or deficien* or subnorm* or retard*))                                                                                                                                                                                                                                                                                                                               |
| 7.           | ((development\$ or neurodevelopment\$) N disab\$).tw.                                                                                                                                                                                                                                                                                                                                                                           |
| 8.           | (education\$ N5 su?bnorm\$).tw.                                                                                                                                                                                                                                                                                                                                                                                                 |
| 9.           | (cretin\$ or feeble minded\$ or imbecil\$ or moron\$).tw.                                                                                                                                                                                                                                                                                                                                                                       |
| 10.          | S1 OR S2 OR S3 OR S4 OR S5 OR S6 OR S7 OR S8 OR S9 OR S10                                                                                                                                                                                                                                                                                                                                                                       |
| 11.          | cause of death/                                                                                                                                                                                                                                                                                                                                                                                                                 |
| 12.          | mortality/                                                                                                                                                                                                                                                                                                                                                                                                                      |
| 13.          | fatal outcome/                                                                                                                                                                                                                                                                                                                                                                                                                  |
| 14.          | death/                                                                                                                                                                                                                                                                                                                                                                                                                          |
| 15.          | hospital mortality/                                                                                                                                                                                                                                                                                                                                                                                                             |
| 16.          | mortality.ti.ab                                                                                                                                                                                                                                                                                                                                                                                                                 |
| 17.          | fatal.ti.ab                                                                                                                                                                                                                                                                                                                                                                                                                     |
| 18.          | death.ti.ab                                                                                                                                                                                                                                                                                                                                                                                                                     |
| 19.          | Or/ 11-18                                                                                                                                                                                                                                                                                                                                                                                                                       |
| 20.          | "pulmonary disease" or "airway disease" or "broncho-pulmonary disease" or "respiratory disease" or "lung disease" or "lung disorder" or "pulmonary disorder" or "respiratory disorder" or "pneumonia" or "bronchopneumonia" or "lung infection" or pulmonary infection" or respiratory infection" or "asthma" or "chronic obstructive pulmonary disease" or "aspiration pneumonia" or "bronchiectasis" or "respiratory failure" |
| 21.          | 10 and 19 and 20                                                                                                                                                                                                                                                                                                                                                                                                                |

Web of Science (All databases, including MEDLINE) 2016-current

TS= mortality OR death OR cause of death OR cause of mortality OR dead OR died  
AND

TS= intellectual disab\* or intellectual impair\* or developmental disab\* or learning disab\* or mental retard\* or mental handicap\*

AND

TS=asthma\* or bronchial asthma or pneumoni\* or lobar pneumoni\* or lobar pneumoni\* or bacterial pneumoni\* or viral pneumoni\* or bronchopneumonia\* or bronchial pneumoni\* or lung disease\* or lung disorder\* or lung infect\* or pulmonary disease\* or pulmonary disorder or pulmonary infect\* or respiratory disease\* or respiratory disorder or respiratory infect\* or obstructive lung disease\* or obstructive pulmonary disease\* or aspiration pneumoni\* or bronchiectasi
