# Supplementary material for: Respiratory-associated deaths in people with intellectual disabilities: a systematic review and meta-analysis
Source: PubMed Central journal article supplement — BMJ Open. 2021 Jul 14;11(7):e043658. doi: 10.1136/bmjopen-2020-043658 (PMC8280912; doi:10.1136/bmjopen-2020-043658), 2021-07-14
Supplement: bmjopen-2020-043658supp002.pdf [file bmjopen-2020-043658supp002.pdf]

**Appendix 2: Excluded papers – References and reasons for exclusion**

|    | <b>Reference</b>                                                                                                                                                                                                                                              | <b>Reason</b>                                               |
|----|---------------------------------------------------------------------------------------------------------------------------------------------------------------------------------------------------------------------------------------------------------------|-------------------------------------------------------------|
| 1  | Bilder D, Botts EL, Smith KR, Pimentel R, Farley M, Viskochil J. Excess mortality and causes of death in autism spectrum disorders: A follow up of the 1980s Utah/ UCLA autism epidemiologic study. <i>J Autism Dev Disord</i> 2013; <b>43(5)</b> : 1196-1204 | Did not include individuals with intellectual disabilities. |
| 2  | Decoufle P, Autry A. Increased mortality in children and adolescents with developmental disabilities. <i>Paediatr Perinat Epidemiol</i> 2002; <b>16(4)</b> : 375-382                                                                                          | No general population comparison group.                     |
| 3  | Florio T, Trollor J. Mortality among a cohort of persons with an intellectual disability in New South Wales, Australia. <i>J Appl Res Intellect Disabil</i> 2015; <b>28(5)</b> : 383-393.                                                                     | Respiratory causes of death not included separately.        |
| 4  | Glover G, Ayub M. How people with learning disabilities die. Improving Health and Lives Learning Disabilities Observatory. Durham, 2010.                                                                                                                      | Not peer-reviewed.                                          |
| 5  | Jahan I, Karim T, Das MC, Muhit M, McIntyre S, Smithers-Sheedy H, et al. Mortality in children with cerebral palsy in rural Bangladesh: a population-based surveillance study. <i>Dev Med Child Neurol</i> 2019; <b>61(11)</b> : 1336-1343                    | Did not include individuals with intellectual disabilities. |
| 6  | McCarron M, Carroll R, Kelly C, McCallion P. Mortality rates in the general Irish population compared to those with an intellectual disability from 2003 to 2012. <i>J Appl Res Intellect Disabil</i> 2015; <b>28(5)</b> : 406-413.                           | Respiratory causes of death not included separately.        |
| 7  | Perez CM, Ball SL, Wagner AP, Clare ICH, Holland AJ, Redley M. The incidence of healthcare use, ill health and mortality in adults with intellectual disabilities and mealtime support needs. <i>J Intellect Disabil Res</i> 2015; <b>59(7)</b> : 638-652     | No general population comparison group.                     |
| 8  | Reid, SM, Carlin JB, Reddihough DS. Survival of individuals with cerebral palsy born in Victoria, Australia, between 1970 and 2004. <i>Dev Med Child Neurol</i> 2012; <b>54(4)</b> : 353-360                                                                  | Did not include individuals with intellectual disabilities. |
| 9  | Shavelle, Robert M.; Strauss, David J.; Pickett, Jane Causes of death in autism. <i>J Autism Dev Disord</i> 2001; <b>31(6)</b> : 569-576                                                                                                                      | Did not include individuals with intellectual disabilities. |
| 10 | Similä S, Von Wendt L, Rantakallio P. Mortality of mentally retarded children to 17 years of age assessed in a prospective one-year birth cohort. <i>J Ment Defic Res</i> 1986; <b>30</b> : 401-5                                                             | Respiratory causes of death not included separately.        |

|    |                                                                                                                                                                                                                                |                                                                                                                                                                                         |
|----|--------------------------------------------------------------------------------------------------------------------------------------------------------------------------------------------------------------------------------|-----------------------------------------------------------------------------------------------------------------------------------------------------------------------------------------|
| 11 | Stankiewicz E, Ouellette-Kuntz H, McIsaac M, Shoostari S, Balogh R. Patterns of mortality among adults with intellectual and developmental disabilities in Ontario. <i>Can J Public Health</i> 2018; <b>109(5-6)</b> : 866-872 | <70%* of participants had intellectual disabilities.<br>*We emailed this author to check if >70% of sample had ID – they replied but didn't have the data to check, so it was excluded. |
| 12 | Tyrer F, Smith LK, McGrother CW. Mortality in adults with moderate to profound intellectual disability: a population-based study. <i>J Intellect Disabil Res</i> , 2007; <b>51(7)</b> : 520-527.                               | Respiratory causes of death not included separately.                                                                                                                                    |
