# Supplementary figures and images for: Respiratory-associated deaths in people with intellectual disabilities: a systematic review and meta-analysis
Source: PubMed Central journal article supplement — BMJ Open. 2021 Jul 14;11(7):e043658. doi: 10.1136/bmjopen-2020-043658 (PMC8280912; doi:10.1136/bmjopen-2020-043658), 2021-07-14

## Sensitivity A – minus Raitasuo

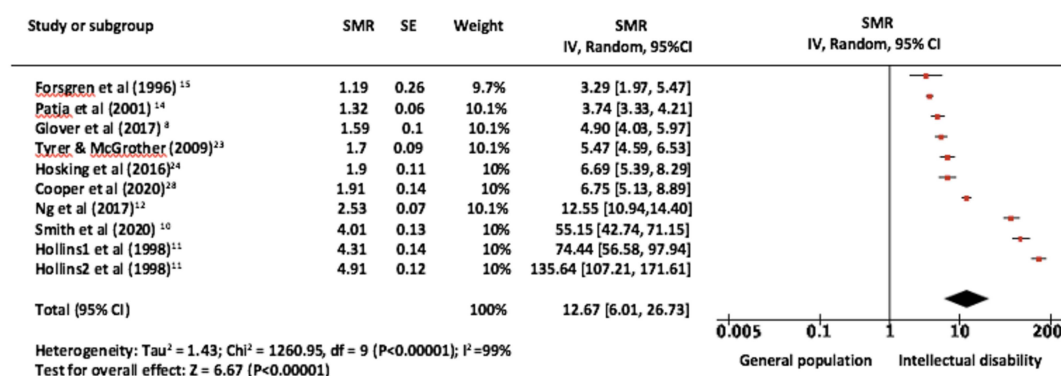

## Sensitivity B – minus Raitasuo and Tyrer

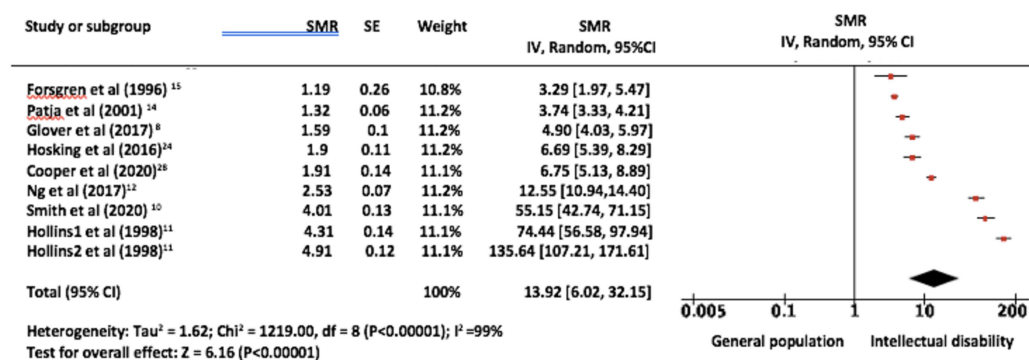

Supplement: bmjopen-2020-043658supp003.pdf [file bmjopen-2020-043658supp003.pdf]
